# Supplementary material for: Diagnostic value of triglyceride–glucose index and related parameters in metabolism-associated fatty liver disease in a Chinese population: a cross-sectional study
Source: PubMed Central journal article supplement — BMJ Open. 2023 Sep 29;13(9):e075413. doi: 10.1136/bmjopen-2023-075413 (PMC10546149; doi:10.1136/bmjopen-2023-075413), 2023-09-29
Supplement: bmjopen-2023-075413.draft_revisions.pdf [file bmjopen-2023-075413.draft_revisions.pdf]

# BMJ Open

BMJ Open is committed to open peer review. As part of this commitment we make the peer review history of every article we publish publicly available.

When an article is published we post the peer reviewers' comments and the authors' responses online. We also post the versions of the paper that were used during peer review. These are the versions that the peer review comments apply to.

The versions of the paper that follow are the versions that were submitted during the peer review process. They are not the versions of record or the final published versions. They should not be cited or distributed as the published version of this manuscript.

BMJ Open is an open access journal and the full, final, typeset and author-corrected version of record of the manuscript is available on our site with no access controls, subscription charges or pay-per-view fees (<http://bmjopen.bmj.com>).

If you have any questions on BMJ Open's open peer review process please email [info.bmjopen@bmj.com](mailto:info.bmjopen@bmj.com)

# BMJ Open

## The Application of Triglyceride-Glucose Index and Related Parameters in Diagnosing MAFLD in a Chinese population

|                               |                                                                                                                                                                                                                                                                                                                                                                                                                                                                                                      |
|-------------------------------|------------------------------------------------------------------------------------------------------------------------------------------------------------------------------------------------------------------------------------------------------------------------------------------------------------------------------------------------------------------------------------------------------------------------------------------------------------------------------------------------------|
| Journal:                      | <i>BMJ Open</i>                                                                                                                                                                                                                                                                                                                                                                                                                                                                                      |
| Manuscript ID                 | bmjopen-2023-075413                                                                                                                                                                                                                                                                                                                                                                                                                                                                                  |
| Article Type:                 | Original research                                                                                                                                                                                                                                                                                                                                                                                                                                                                                    |
| Date Submitted by the Author: | 09-May-2023                                                                                                                                                                                                                                                                                                                                                                                                                                                                                          |
| Complete List of Authors:     | Yu, Rong; Fujian Medical University, Department of Epidemiology and Health Statistics<br>Peng, Hwei; Fujian Medical University, Department of Epidemiology and Health Statistics<br>Lu, Lili; General Administration of Customs of the People's Republic of China, Xiamen Customs, People's Republic of China<br>Yin, Shuo; Fujian Medical University, Department of Epidemiology and Health Statistics<br>Peng, Xian-E; Fujian Medical University, Department of Epidemiology and Health Statistics |
| Keywords:                     | EPIDEMIOLOGY, Hepatology < INTERNAL MEDICINE, Lipid disorders < DIABETES & ENDOCRINOLOGY                                                                                                                                                                                                                                                                                                                                                                                                             |
|                               |                                                                                                                                                                                                                                                                                                                                                                                                                                                                                                      |

SCHOLARONE™  
Manuscripts

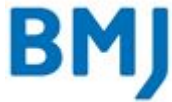

I, the Submitting Author has the right to grant and does grant on behalf of all authors of the Work (as defined in the below author licence), an exclusive licence and/or a non-exclusive licence for contributions from authors who are: i) UK Crown employees; ii) where BMJ has agreed a CC-BY licence shall apply, and/or iii) in accordance with the terms applicable for US Federal Government officers or employees acting as part of their official duties; on a worldwide, perpetual, irrevocable, royalty-free basis to BMJ Publishing Group Ltd ("BMJ") its licensees and where the relevant Journal is co-owned by BMJ to the co-owners of the Journal, to publish the Work in this journal and any other BMJ products and to exploit all rights, as set out in our [licence](#).

The Submitting Author accepts and understands that any supply made under these terms is made by BMJ to the Submitting Author unless you are acting as an employee on behalf of your employer or a postgraduate student of an affiliated institution which is paying any applicable article publishing charge ("APC") for Open Access articles. Where the Submitting Author wishes to make the Work available on an Open Access basis (and intends to pay the relevant APC), the terms of reuse of such Open Access shall be governed by a Creative Commons licence – details of these licences and which [Creative Commons](#) licence will apply to this Work are set out in our licence referred to above.

Other than as permitted in any relevant BMJ Author's Self Archiving Policies, I confirm this Work has not been accepted for publication elsewhere, is not being considered for publication elsewhere and does not duplicate material already published. I confirm all authors consent to publication of this Work and authorise the granting of this licence.

1  
2  
3 **The Application of Triglyceride-Glucose Index and Related**  
4  
5  
6 **Parameters in Diagnosing MAFLD in a Chinese population**  
7

8 Rong Yu<sup>1†</sup>, Hewei Peng<sup>1†</sup>, Lili Lu<sup>2</sup>, Weijiang Xie<sup>1</sup>, Shuo Yin<sup>1</sup> and Xian-E Peng<sup>1,3\*</sup>  
9

10  
11 \* Corresponding author  
12

13 Xian-E Peng  
14

15 Mail address: Department of Epidemiology and Health Statistics, Xuefu North Road  
16  
17 1st, Shangjie Town, Minhou Country, Fuzhou, Fujian, 350108, China.  
18  
19

20 Tel and Fax: +86-591-22862648  
21

22 Email: [fmuxe@163.com](mailto:fmuxe@163.com)  
23

24  
25 1 Department of Epidemiology and Health Statistics, Fujian Provincial Key Laboratory  
26  
27 of Environment Factors and Cancer, School of Public Health, Fujian Medical  
28  
29 University, Fuzhou, 350122, People's Republic of China  
30

31 2 Xiamen Customs, People's Republic of China, Xiamen 361006, China  
32

33  
34 3 Key Laboratory of Ministry of Education for Gastrointestinal Cancer, Fujian Medical  
35  
36 University, Fuzhou 350108, China  
37

38  
39  
40  
41  
42  
43  
44  
45  
46  
47  
48 Word count: 2356  
49  
50  
51  
52  
53  
54  
55  
56  
57  
58  
59  
60

## Abstract

**Objective** To explore the diagnostic value of TyG and its related parameters in MAFLD.

**Design** A cross-sectional study of local residents who attended medical checkups at the First Hospital of Nanping City, Fujian Medical University, between 2015 and 2017.

**Setting** One participation center.

**Participants** 2605 subjects met the inclusion exclusion criteria. Subjects were grouped according to whether they had MAFLD or not.

**Results** The TyG index and its related parameters are risk factors for the development of MAFLD ( $P<0.001$ ). Restriction cube spline (RCS) analysis showed a significant dose-response relationship between the TyG index and MAFLD. The risk of developing MAFLD increases significantly with increasing levels of TyG. After adjusting for confounders, this relationship remains ( $OR: 4.89, 95\%CI: 3.98-6.00$ ). The areas under the ROC curves (AUC) of the TyG index for MAFLD detection were 0.793 (0.774-0.812). The AUCs of TyG-related parameters were improved, among which TyG-waist circumference (TyG-WC) showed the largest AUC for MAFLD detection (0.873,  $95\%CI: 0.860-0.887$ ). In addition, the best cut-off value of the TyG-WC was 716.743 with a sensitivity and specificity of 88.7% and 71.4%, respectively.

**Conclusion** The TyG index is effective in identifying MAFLD, and the TyG-related parameters improved the identification and prediction of MAFLD, suggesting that TyG-related parameters, especially TyG-WC may be a useful marker for identifying MAFLD.

**Keywords:** Metabolic-associated Fatty Liver Disease; TyG; TyG Index-Related Parameters

### Strengths and limitations of this study

We combined metabolic-related indices with TyG index to predict MFALD with a

1  
2  
3 comprehensive index.

4  
5 In this study, the latest diagnostic criteria were used for the diagnosis of MAFLD.

6  
7 Measurement error in self-reported dietary habits and other data in this study is  
8  
9 unavoidable.

## 10 11 12 **Introduction**

13  
14  
15 Non-alcoholic fatty liver disease (NAFLD), with hepatic steatosis as the main  
16  
17 pathological manifestation, can progress to cirrhosis and hepatocellular  
18  
19 carcinoma(HCC)(1, 2), affecting approximately one-quarter of the adult population  
20  
21 worldwide(3). In recent years, there has been increasing recognition of the inherent  
22  
23 flaws in the term "non-alcoholic". It overemphasizes the presence or absence of alcohol  
24  
25 use disorders and ignores the importance of metabolic risk for NAFLD progression. As  
26  
27 such, an international panel of experts renamed NAFLD to metabolism-associated fatty  
28  
29 liver disease (MAFLD) in 2020(4). MAFLD is used as a more appropriate disease  
30  
31 designation to describe liver diseases associated with metabolic dysfunction(5). Due to  
32  
33 its high global prevalence, it poses a serious threat to human health and a huge economic  
34  
35 burden to society(6). Steatosis is a reversible condition in its early stages and can be  
36  
37 addressed through behavioral changes(7, 8). For example, increasing physical activity  
38  
39 and controlling energy intake are particularly effective interventions in the early stages  
40  
41 of the disease(9, 10). However, the aggressive form of steatohepatitis can progress to  
42  
43 fibrosis and eventually cirrhosis, which is irreversible damage(11). Due to the high  
44  
45 prevalence of MAFLD and its progressive nature, the early detection of MAFLD is of  
46  
47 great significance to enable the provision of early intervention, thus avoiding the  
48  
49 progression of MAFLD(12).

50  
51  
52 Although the gold standard for identifying fatty liver disease (FLD) is still liver  
53  
54 biopsy, it is unsuitable for large-scale epidemiological surveys because of its  
55  
56  
57  
58  
59  
60

1  
2  
3 invasiveness, poor acceptability, cost, and sampling variability(12). Thus, it is  
4 necessary to develop a simple tool to identify MAFLD. Significant progress has been  
5 made in the noninvasive assessment of FLD in recent years, including fatty liver index  
6 (FLI) and hepatic steatosis index (HSI)(13). The FLI is a prevalent biomarker panel  
7 consisting of body mass index (BMI), waist circumference, triglycerides, and gamma-  
8 glutamyl transferase ( $FLI = e^{0.953 \cdot \ln(TG) + 0.139 \cdot BMI + 0.718 \cdot \ln(GGT) + 0.053 \cdot WC - 15.745} /$   
9  $(1 + e^{0.953 \cdot \ln(TG) + 0.139 \cdot BMI + 0.718 \cdot \ln(GGT) + 0.053 \cdot WC - 15.745}) \times 100$ )(14). The HSI is a biomarker  
10 panel consisting of BMI, diabetes, and the alanine transaminase(ALT)/aspartate  
11 transaminase(AST) ratio ( $HSI = 8 \cdot ALT/AST + BMI (+2 \text{ if type 2 diabetes, } +2 \text{ if}$   
12  $\text{female})$ )(15). However, the calculation process of both indices is more complicated and  
13 involves more traits and indicators. An ideal non-invasive test should be simple, easily  
14 accessible, cost-effective, and efficient, and allow easy visualization to detect and  
15 identify people at high risk of MAFLD(16). With such a test, large-scale population-  
16 wide screening and preventive programs in large populations would be possible. Prior  
17 studies have confirmed that insulin resistance (IR) is an important pathogenic  
18 mechanism in MAFLD(17). Homeostasis model assessment of insulin resistance  
19 (HOMA-IR) is the gold standard diagnostic method of IR and has an excellent  
20 diagnostic effect on MAFLD(18). However, HOMA-IR is costly, time-consuming, and  
21 complex, which limits its widespread implementation in large epidemiological  
22 investigations(19). TyG, a non-invasive index, calculated from fasting glucose and  
23 triglycerides, has been proposed as a reliable marker for IR in clinical practice(20).  
24 Since MAFLD is associated with IR and dyslipidemia, the TyG index is also considered  
25 a useful predictive marker for MAFLD(21). However, the results from epidemiological  
26 studies remained controversial(22). The longitudinal association between baseline TyG  
27 index and the risk of MAFLD was assessed in a cohort study conducted in Jiangsu,  
28  
29  
30  
31  
32  
33  
34  
35  
36  
37  
38  
39  
40  
41  
42  
43  
44  
45  
46  
47  
48  
49  
50  
51  
52  
53  
54  
55  
56  
57  
58  
59  
60

1  
2  
3 China, which included 2056 subjects(21). The results showed that the TyG index was  
4 independently associated with the risk of developing MAFLD (*HR*: 1.784, 95%*CI*:  
5 1.383-2.302, *P*< 0.001)(21). A cross-sectional study in US adults also showed a positive  
6 association between the TyG index and the risk of MAFLD/NAFLD, as for MAFLD,  
7 TyG-WC presented the highest *OR* (*OR*: 28.435, 95%*CI*: 12.121-66.705)(23). However,  
8 the sample sizes of these studies were small, and more large prospective studies are  
9 needed to further validate the association between the two.  
10  
11  
12  
13  
14  
15  
16  
17  
18

19 The present study aimed to investigate the association of the TyG index and its  
20 related parameters with MAFLD in a Chinese population and to assess their predictive  
21 efficacy for MAFLD.  
22  
23  
24  
25

## 26 **Material and Methods**

### 27 **Study subjects and design**

28  
29  
30 This cross-sectional study included 2605 subjects who underwent a physical  
31 examination and completed an abdominal ultrasound examination at Nanping First  
32 Hospital, Fujian Medical University (Nanping, China) between April 2015 and August  
33 2017. The study protocol conformed to the ethical guidelines of the 1,975 Declaration  
34 of Helsinki (6th revision, 2008) and was approved by the Ethics Committee of Fujian  
35 Medical University(ethical approval number 2014096). All the participants provided  
36 their informed consent before the study started.  
37  
38  
39  
40  
41  
42  
43  
44  
45  
46

47 The inclusion criteria for participants in the current study were permanent  
48 residency in Nanping and age between 18 and 75 years and completed ultrasonography  
49 examination. The diagnosis of fatty liver disease (FLD) in this cohort was primarily  
50 based on ultrasonographic findings rather than a liver biopsy(24). This is because recent  
51 standardized criteria have significantly improved the diagnostic accuracy of  
52 ultrasonography so that even minor degrees of steatosis can be detected.  
53  
54  
55  
56  
57  
58  
59  
60



## Data collection and measure

Data on MAFLD risk factors were obtained through direct interviews with the help of a structured medical questionnaire. The risk factors included were age, gender, marital status, income, educational level, smoking, drinking, lifestyle, dietary habits, medical history, and family history of MAFLD. All subjects underwent a complete physical examination in the morning after an overnight fast. The clinical variables collected were height, weight, waist circumference (WC), hip circumference (HC), Waist-to-Hip Ratio (WHR), diastolic blood pressure (DBP), and systolic blood pressure (SBP), serum triglyceride (TG), total cholesterol (TC), low-density lipoprotein (LDL), and high-density lipoprotein (HDL), fasting plasma glucose (FPG), Gamma-glutamyltransferase (GGT) alanine transaminase (ALT), and aspartate aminotransferase (AST). All these variables were assessed using standard procedures (triglyceride: 1mmol/L=88.5mg/dL; fasting blood glucose: 1mmol/L=18mg/dL). Body mass index (BMI) was calculated as body weight/(height)<sup>2</sup>. Food consumption was assessed with the help of a food frequency questionnaire, and total consumption was calculated by multiplying the frequency of food consumption by the amount of food consumed each time. Hypertension was defined as systolic blood pressure  $\geq 140$  mmHg and/or diastolic blood pressure  $\geq 90$  mmHg, or the current use of anti-hypertensive medication. Diabetes was defined as fasting plasma glucose  $\geq 7.0$  mmol/L or the current use of hypoglycemic agents.

### Triglyceride-Glucose Index and Related Parameters

The TyG index and its related parameters were calculated according to the previous studies(20, 24). The specific calculation formulas were as follows:

- (1)  $TyG = (\ln[\text{triglyceride}(\text{mg/dL}) \times \text{glucose}(\text{mg/dL})/2])$ ;
- (2)  $TyG-WC = TyG \times WC$ ;

1  
2  
3 (3)  $TyG-BMI = TyG \times BMI$ ;  
4

5 (4)  $TyG-WHR = TyG \times WHR$ ;  
6  
7

## 8 **Diagnosis of MAFLD**

9

10 MAFLD is diagnosed by ultrasound showing hepatic steatosis and having one of  
11 the following three criteria(3): (1) overweight or obesity ( $BMI \geq 23.0\text{kg/m}^2$ ); (2) type  
12 2 diabetes mellitus (T2DM); and (3) metabolic dysregulation among non-overweight  
13 individuals ( $BMI < 23.0\text{kg/m}^2$ ). Metabolic disorders include abnormalities in WC,  
14 blood pressure (BP), TG, HDL, prediabetes, HOMA-IR, and C-reactive protein (CRP).  
15 Non-overweight individuals meeting any two and more of the metabolic disorders are  
16 diagnosed as MAFLD.  
17  
18  
19  
20  
21  
22  
23  
24  
25

## 26 **Statistical Analyses**

27

28 The baseline characteristics of subjects were analyzed using the Nonparametric  
29 Kruskal-Wallis test for non-normal continuous variables and the Chi-Square test for  
30 nominal variables. Continuous variables were expressed as median (interquartile range,  
31 IQR). Univariate and multivariate logistic regression methods were used to analyze the  
32 association of TyG and its related parameters with MAFLD risk. The restricted cubic  
33 spline (RCS) was used to explore the dose-response relationship between TyG and its  
34 related parameters and the risk of MAFLD. The predictive value of TyG and related  
35 parameters were compared using the area under receiver operating characteristic  
36 (AUROC).  
37  
38  
39  
40  
41  
42  
43  
44  
45  
46  
47  
48

49 All analyses were performed in R (version 4.2.1, R Foundation) software or  
50 Statistical Product and Service Solutions (SPSS) 26.0 software. All *P* values were based  
51 on the two-sided test, and  $P < 0.05$  was considered statistically significant.  
52  
53  
54  
55

## 56 **Results**

57

### 58 **Baseline characteristics**

59  
60

Demographic and lifestyle habits and clinical characteristics were detailed in Supplementary Tables 1 and 2. Of the 2605 participants, 726 were MAFLD patients, and the prevalence of MAFLD was 27.9%. The mean age of the participants was 45 years, and 56.5% of the subjects were male. Compared to those without MAFLD, subjects with MAFLD were more likely to be male, older, married, smokers, drinkers, tea drinkers, and have a history of diabetes or hypertension (all  $P<0.05$ ). In addition, the subjects in both groups were different in terms of clinical detection indicators (SBP, DBP, TG, FPG, TC, GGT, HDL, BMI, WC, WHR, FLI, and HSI) (all  $P<0.001$ ).

### **Association of MAFLD with TyG and its related parameters**

The associations between MAFLD and TyG and its related parameters were mainly analyzed using the logistic regression model. In the crude model, TyG and its related parameters were positively correlated with MAFLD risk (Table 1). The positive correlations of TyG and its related parameters with MAFLD remained unchanged after adjusting for gender, age, marital status, and educational level in model 1 (each  $P<0.001$ ). Model 2 further adjusted for variables such as smoking, drinking, and tea drinking based on model 1. The results remained unchanged (each  $P<0.001$ ). Adding adjustments to some disease history indicators in model 3, the results remained similar.

The restricted cubic spline analyses were applied to interpret the dose-response relationships of TyG and its related parameters with MAFLD risk (Figure 1). The *ORs* of MAFLD increased with increasing TyG levels. the *ORs* of MAFLD also rose with the increasing TyG-BMI, TyG-WC, and TyG-WHR.

### **Assessment of the accuracy of TyG and its related parameters for the diagnosis of MAFLD**

The ROC curve for the ability of TyG and its related parameters and traditional indicators to predict the risk of MAFLD were shown in Figure 2. And the performance

of these models was detailed in Table 2. The AUROCs of TyG and its related parameters were greater than that of traditional indicators, including the HSI. The TyG-WC performed the highest AUROC (0.873, 95%CI: 0.860-0.887,  $P<0.001$ ), compared with TyG-BMI (0.862, 95%CI: 0.847-0.876,  $P<0.001$ ), TyG-WHR (0.836, 95%CI: 0.820-0.852,  $P<0.001$ ). Compared with TyG, the accuracy of TyG-WC, TyG-BMI, and TyG-WHR were improved by 26.4%, 18.7%, and 12.5% (each  $P<0.001$ ), respectively. The IDI values of TyG and its parameters were greater than 0. The detailed results were shown in Supplementary Table 3.

## Discussion

In this cross-sectional study, different parameters were tested to predict the presence of MAFLD. A positive association was observed between the TyG index and its associated parameters with the risk of MAFLD. After adjusting for various confounding factors, the TyG index and its related parameters remained independent predictors of MAFLD. Advanced results from ROC curve analyses indicated that TyG-BMI, TyG-WC, and TyG-WHR, especially TyG-WC, had better diagnostic values than the TyG index alone for predicting MAFLD. More detailed discussions of those observations are presented below.

The diagnosis of MAFLD is based on histological (liver biopsy), imaging, and blood biomarker evidence of hepatic fat accumulation (hepatocellular steatosis) in combination with one of the following three conditions: overweight/obesity, type 2 diabetes mellitus, and metabolic dysfunction(25). Currently, abdominal ultrasonography is the primary method for diagnosing hepatic steatosis(26). However, the sensitivity of using ultrasound to diagnose fatty liver is limited. In subjects with BMI > 40 kg/cm<sup>2</sup>, the performance of ultrasound detection is not high(27). Magnetic resonance spectroscopy (MRS) allows quantitative assessment of liver fat content, but

1  
2  
3 it is expensive and requires special software, making it difficult to use widely in large  
4 epidemiological surveys. Many attempts were targeted at finding an appropriate marker  
5 for MAFLD. As a major metabolic organ, the liver plays a crucial role in regulating  
6 glucose and lipid metabolism(28). IR is one of the important pathogenic mechanisms  
7 of MAFLD(23). There is a strong association between IR and the risk of MAFLD(29).  
8 Many traditional metrics that respond to IR, such as TG/HDL-C and HOMA-IR, are  
9 complex and expensive to operate, and difficult to use widely in the general  
10 population(30). TyG index, calculated from fasting glucose and triglyceride levels is a  
11 favorable marker for IR(19). BMI, WC, and WHR are indices for assessing obesity and  
12 are associated with the increased risk of IR, and other metabolic diseases(31). The new  
13 parameters TyG-BMI, TyG-WC, and TyG-WHR combine the above indices and appear  
14 to be more reflective of IR status in MAFLD. Therefore, the parameters above were  
15 introduced in our research for a further comprehensive assessment.

16  
17 We assessed and compared the diagnostic accuracy of the four parameters (TyG  
18 index, TyG-WC, TyG-BMI, and TyG-WHR). Consistent with previous research results,  
19 all the parameters could identify MAFLD in our study(21, 22). RCS analysis revealed  
20 a significant dose-response relationship between the TyG index and MAFLD. The best  
21 cut-off value of TyG for the diagnosis of MAFLD was 8.738 (sensitivity: 72.2%,  
22 specificity: 75.0%). Additionally, TyG-WC, TyG-BMI, and TyG-WHR showed better  
23 discrimination of MAFLD compared with the TyG index. The AUROCs of TyG-related  
24 parameters for the diagnosis of MAFLD were larger and the sensitivity was higher. In  
25 previous studies, FLI and HSI have been shown to have robust diagnostic power for  
26 MAFLD(32, 33). In the present study, the area under the ROC curve of the TyG-WC  
27 index for MAFLD diagnosis was larger than that of the FLI and HSI, and the diagnostic  
28 performance was better. MAFLD is a typical metabolic disease, and consideration of  
29  
30  
31  
32  
33  
34  
35  
36  
37  
38  
39  
40  
41  
42  
43  
44  
45  
46  
47  
48  
49  
50  
51  
52  
53  
54  
55  
56  
57  
58  
59  
60

1  
2  
3 body composition may be critical. Among TyG-related parameters, the AUC of TyG-  
4 WC was the largest at 0.873 (sensitivity: 88.7%, specificity: 71.4%). Norbert Stefan et  
5 al.(34) found that hepatic steatosis correlated with BMI, but more strongly with visceral  
6 fat (measured as WC) because visceral adipose tissue (VAT) is more lipid active than  
7 subcutaneous fat on a per unit weight basis. Khamseh et al.(35) findings agreed with  
8 our study. The AUROCs of the TyG index, TyG-BMI, and TyG-WC were 0.676, 0.675,  
9 and 0.693, respectively, all of which were lower than the AUROCs produced in our  
10 study. This difference may be due to the small number of overweight/obese participants  
11 in their study.  
12  
13  
14  
15  
16  
17  
18  
19  
20  
21  
22  
23

24 However, this study has several limitations. Firstly, this is a cross-sectional study,  
25 and a causative relationship cannot be established. Secondly, measurement error in self-  
26 reported dietary habits and other data is inevitable. Nonetheless, because all participants  
27 and researchers in this study were blinded to the results of abdominal ultrasonography  
28 and blood tests, the absence of differential reporting bias may simply have weakened  
29 our observed associations. Thirdly, although we considered a comprehensive set of  
30 confounders, the presence of unmeasured confounders is possible as an observational  
31 study.  
32  
33  
34  
35  
36  
37  
38  
39  
40  
41

## 42 **Conclusions**

43  
44  
45 Our study demonstrated that the TyG index is effective in identifying MAFLD,  
46 and the TyG-related parameters improved the identification and prediction of MAFLD.  
47 TyG and its related parameters have a certain value in the diagnosis of MAFLD. As an  
48 inexpensive and convenient index, TyG and its related parameters, especially TyG-WC  
49 may be a useful marker for identifying MAFLD.  
50  
51  
52  
53  
54  
55  
56  
57  
58  
59  
60

## Acknowledgements

We would like to express their gratitude to all participants for their cooperation and to all staffs for recruiting subjects and their technical assistance.

## Author Contributions

PXE designed the study. YR, PHW, LLL, XWJ, and YS collected the data. YR analyzed the data. YR, PHW, and LLL contributed to the interpretation of results. YR, PHW, LLL, drafted the manuscript. PXE revised the manuscript. All authors have discussed the results and commented on the manuscript. All authors read and approved the final manuscript.

## Funding

This work was supported by the National Natural Science Foundation of China (No. 81473047), the Natural Science Foundation of Fujian Province (No. 2019J01316).

## Abbreviations

NAFLD: Non-alcoholic fatty liver disease; MAFLD: metabolism-associated fatty liver disease; FLI fatty: liver index; HSI: hepatic steatosis index; BMI: body mass index; ALT: alanine transaminase; AST: aspartate transaminase; IR: insulin resistance; HOMA-IR: Homeostasis model assessment of insulin resistance; TyG: Triglyceride glucose index; TG: triglyceride; TC: total cholesterol; LDL-C: low-density lipoprotein cholesterol; HDL-C: high-density lipoprotein cholesterol; FPG: fasting plasma-glucose; WC: Waist circumference; IQR: interquartile range; RCS: restricted cubic spline; AUC: Area under curve; AUROC: area under receiver operating characteristic; NRI: Net Reclassification Index; IDI: Integrated Discrimination Improvement; UA: uric acid; VAT: visceral adipose tissue

## Availability of data and materials

The datasets used can be available from the corresponding author on reason-able

1  
2  
3 request.  
4

5  
6 **Ethics approval and consent to participate**  
7

8 The current study was carried out in compliance with the Declaration of Helsinki, and  
9  
10 the Ethics Committee of Fujian Medical University approved the study protocol (ethics  
11  
12 number 2014096). All subjects provided their informed consent prior to participating  
13  
14 in this study.  
15

16  
17 **Competing interests**  
18

19 The authors declare that they have no competing interests.  
20

21  
22 **Consent for publication**  
23

24 Not applicable.  
25  
26  
27  
28  
29  
30  
31  
32  
33  
34  
35  
36  
37  
38  
39  
40  
41  
42  
43  
44  
45  
46  
47  
48  
49  
50  
51  
52  
53  
54  
55  
56  
57  
58  
59  
60



## References

1. Eslam M, Valenti L, Romeo S. Genetics and epigenetics of NAFLD and NASH: Clinical impact. *J Hepatol.* 2018;68(2):268-79.
2. Papatheodoridi M, Cholongitas E. Diagnosis of Non-alcoholic Fatty Liver Disease (NAFLD): Current Concepts. *Curr Pharm Des.* 2018;24(38):4574-86.
3. Eslam M, Newsome PN, Sarin SK, Anstee QM, Targher G, Romero-Gomez M, et al. A new definition for metabolic dysfunction-associated fatty liver disease: An international expert consensus statement. *J Hepatol.* 2020;73(1):202-9.
4. Liao X, Ma Q, Wu T, Shao C, Lin Y, Sun Y, et al. Lipid-Lowering Responses to Dyslipidemia Determine the Efficacy on Liver Enzymes in Metabolic Dysfunction-Associated Fatty Liver Disease with Hepatic Injuries: A Prospective Cohort Study. *Diabetes Metab Syndr Obes.* 2022;15:1173-84.
5. Su W, Chen M, Xiao L, Du S, Xue L, Feng R, et al. Association of metabolic dysfunction-associated fatty liver disease, type 2 diabetes mellitus, and metabolic goal achievement with risk of chronic kidney disease. *Front Public Health.* 2022;10:1047794.
6. Wang X, Liu X, He P, Guan K, Yang Y, Lei Y, et al. The Imbalance of Mitochondrial Homeostasis of Peripheral Blood-Derived Macrophages Mediated by MAFLD May Impair the Walking Ability of Elderly Patients with Osteopenia. *Oxid Med Cell Longev.* 2022;2022:5210870.
7. Foghsgaard S, Andreasen C, Vedtofte L, Andersen ES, Bahne E, Strandberg C, et al. Nonalcoholic Fatty Liver Disease Is Prevalent in Women With Prior Gestational Diabetes

1  
2  
3 Mellitus and Independently Associated With Insulin Resistance and Waist Circumference.

4  
5  
6 Diabetes Care. 2017;40(1):109-16.

7  
8  
9 8. Sasso M, Miette V, Sandrin L, Beaugrand M. The controlled attenuation parameter (CAP):

10  
11 a novel tool for the non-invasive evaluation of steatosis using Fibroscan. Clin Res Hepatol

12  
13 Gastroenterol. 2012;36(1):13-20.

14  
15  
16  
17 9. Rinella ME, Sanyal AJ. Management of NAFLD: a stage-based approach. Nat Rev

18  
19 Gastroenterol Hepatol. 2016;13(4):196-205.

20  
21  
22 10. El-Agroudy NN, Kurzbach A, Rodionov RN, O'Sullivan J, Roden M, Birkenfeld AL, et al.

23  
24 Are Lifestyle Therapies Effective for NAFLD Treatment? Trends Endocrinol Metab.

25  
26  
27 2019;30(10):701-9.

28  
29  
30 11. Yong HY, Larrouy-Maumus G, Zloh M, Smyth R, Ataya R, Benton CM, et al. Early detection

31  
32 of metabolic changes in drug-induced steatosis using metabolomics approaches. RSC Adv.

33  
34 2020;10(67):41047-57.

35  
36  
37 12. Castera L, Friedrich-Rust M, Loomba R. Noninvasive Assessment of Liver Disease in

38  
39 Patients With Nonalcoholic Fatty Liver Disease. Gastroenterology. 2019;156(5):1264-81.e4.

40  
41  
42 13. Zhou JH, Cai JJ, She ZG, Li HL. Noninvasive evaluation of nonalcoholic fatty liver disease:

43  
44 Current evidence and practice. World J Gastroenterol. 2019;25(11):1307-26.

45  
46  
47 14. Wang J, Qi Y, Xin Z, Huo Y, Wan Q, Qin Y, et al. Isotemporal substitution of different

48  
49 behaviour patterns with the presence of MAFLD in Chinese adults. Liver Int. 2022;42(12):2683-

50  
51  
52 95.

- 1  
2  
3 15. Li H, Zhang Y, Luo H, Lin R. The lipid accumulation product is a powerful tool to diagnose  
4  
5  
6 metabolic dysfunction-associated fatty liver disease in the United States adults. *Front*  
7  
8  
9 *Endocrinol (Lausanne)*. 2022;13:977625.  
10  
11  
12 16. Pan X, Xie X, Peng H, Cai X, Li H, Hong Q, et al. Risk Prediction for Non-alcoholic Fatty  
13  
14  
15 Liver Disease Based on Biochemical and Dietary Variables in a Chinese Han Population. *Front*  
16  
17  
18 *Public Health*. 2020;8:220.  
19  
20  
21 17. Ding YS, Guo SX, Ma RL, Li SG, Guo H, Zhang JY, et al. Association of Metabolic  
22  
23  
24 Syndrome with the Adiponectin to Homeostasis Model Assessment of Insulin Resistance Ratio.  
25  
26  
27 *Mediators Inflamm*. 2015;2015:607364.  
28  
29  
30 18. Han M, Wang H, Yang S, Zhu S, Zhao G, Shi H, et al. Triglyceride glucose index and  
31  
32  
33 Atherogenic index of plasma for predicting colorectal neoplasms in patients without  
34  
35  
36 cardiovascular diseases. *Front Oncol*. 2022;12:1031259.  
37  
38  
39 19. Luo E, Wang D, Yan G, Qiao Y, Liu B, Hou J, et al. High triglyceride-glucose index is  
40  
41  
42 associated with poor prognosis in patients with acute ST-elevation myocardial infarction after  
43  
44  
45 percutaneous coronary intervention. *Cardiovasc Diabetol*. 2019;18(1):150.  
46  
47  
48 20. Alizargar J, Bai CH, Hsieh NC, Wu SV. Use of the triglyceride-glucose index (TyG) in  
49  
50  
51 cardiovascular disease patients. *Cardiovasc Diabetol*. 2020;19(1):8.  
52  
53  
54 21. Zhang R, Guan Q, Zhang M, Ding Y, Tang Z, Wang H, et al. Association Between  
55  
56  
57 Triglyceride-Glucose Index and Risk of Metabolic Dysfunction-Associated Fatty Liver Disease:  
58  
59  
60 A Cohort Study. *Diabetes Metab Syndr Obes*. 2022;15:3167-79.

- 1  
2  
3  
4  
5  
6  
7  
8  
9  
10  
11  
12  
13  
14  
15  
16  
17  
18  
19  
20  
21  
22  
23  
24  
25  
26  
27  
28  
29  
30  
31  
32  
33  
34  
35  
36  
37  
38  
39  
40  
41  
42  
43  
44  
45  
46  
47  
48  
49  
50  
51  
52  
53  
54  
55  
56  
57  
58  
59  
60
22. Wang J, Yan S, Cui Y, Chen F, Piao M, Cui W. The Diagnostic and Prognostic Value of the Triglyceride-Glucose Index in Metabolic Dysfunction-Associated Fatty Liver Disease (MAFLD): A Systematic Review and Meta-Analysis. *Nutrients*. 2022;14(23).
23. Peng H, Pan L, Ran S, Wang M, Huang S, Zhao M, et al. Prediction of MAFLD and NAFLD using different screening indexes: A cross-sectional study in U.S. adults. *Front Endocrinol (Lausanne)*. 2023;14:1083032.
24. Er LK, Wu S, Chou HH, Hsu LA, Teng MS, Sun YC, et al. Triglyceride Glucose-Body Mass Index Is a Simple and Clinically Useful Surrogate Marker for Insulin Resistance in Nondiabetic Individuals. *PLoS One*. 2016;11(3):e0149731.
25. Eslam M, Sarin SK, Wong VW, Fan JG, Kawaguchi T, Ahn SH, et al. The Asian Pacific Association for the Study of the Liver clinical practice guidelines for the diagnosis and management of metabolic associated fatty liver disease. *Hepatology Int*. 2020;14(6):889-919.
26. Cai C, Lin Y, Yu C. Circulating miRNAs as Novel Diagnostic Biomarkers in Nonalcoholic Fatty Liver Disease: A Systematic Review and Meta-Analysis. *Can J Gastroenterol Hepatol*. 2019;2019:2096161.
27. Guan C, Fu S, Zhen D, Yang K, An J, Wang Y, et al. Metabolic (Dysfunction)-Associated Fatty Liver Disease in Chinese Patients with Type 2 Diabetes from a Subcenter of the National Metabolic Management Center. *J Diabetes Res*. 2022;2022:8429847.
28. Watt MJ, Miotto PM, De Nardo W, Montgomery MK. The Liver as an Endocrine Organ- Linking NAFLD and Insulin Resistance. *Endocr Rev*. 2019;40(5):1367-93.

- 1  
2  
3  
4 29. Oses M, Medrano M, Margareto Sanchez J, Portillo MP, Aguilera CM, Altmäe S, et al.  
5  
6 Peripheral blood mononuclear cells-expressed miRNA profiles derived from children with  
7  
8 metabolic-associated fatty liver disease and insulin resistance. *Pediatr Obes.*  
9  
10 2022;17(12):e12966.  
11  
12  
13  
14  
15 30. Park SY, Gautier JF, Chon S. Assessment of Insulin Secretion and Insulin Resistance in  
16  
17 Human. *Diabetes Metab J.* 2021;45(5):641-54.  
18  
19  
20  
21 31. Xue Y, Xu J, Li M, Gao Y. Potential screening indicators for early diagnosis of  
22  
23 NAFLD/MAFLD and liver fibrosis: Triglyceride glucose index-related parameters. *Front*  
24  
25 *Endocrinol (Lausanne).* 2022;13:951689.  
26  
27  
28  
29 32. Bourgonje AR, van den Berg EH, Kieneker LM, Nilsen T, Hidden C, Bakker SJL, et al.  
30  
31 Plasma Calprotectin Levels Associate with Suspected Metabolic-Associated Fatty Liver  
32  
33 Disease and All-Cause Mortality in the General Population. *Int J Mol Sci.* 2022;23(24).  
34  
35  
36  
37  
38 33. Okada A, Yamada G, Kimura T, Hagiwara Y, Yamaguchi S, Kurakawa KI, et al. Diagnostic  
39  
40 ability using fatty liver and metabolic markers for metabolic-associated fatty liver disease  
41  
42 stratified by metabolic/glycemic abnormalities. *J Diabetes Investig.* 2023;14(3):463-78.  
43  
44  
45  
46  
47 34. Milić S, Lulić D, Štimac D. Non-alcoholic fatty liver disease and obesity: biochemical,  
48  
49 metabolic and clinical presentations. *World J Gastroenterol.* 2014;20(28):9330-7.  
50  
51  
52  
53 35. Khamseh ME, Malek M, Abbasi R, Taheri H, Lahouti M, Alaei-Shahmiri F. Triglyceride  
54  
55 Glucose Index and Related Parameters (Triglyceride Glucose-Body Mass Index and  
56  
57 Triglyceride Glucose-Waist Circumference) Identify Nonalcoholic Fatty Liver and Liver Fibrosis  
58  
59  
60

1  
2  
3 in Individuals with Overweight/Obesity. *Metab Syndr Relat Disord.* 2021;19(3):167-73.  
4  
5  
6  
7  
8  
9  
10  
11  
12  
13  
14  
15  
16  
17  
18  
19  
20  
21  
22  
23  
24  
25  
26  
27  
28  
29  
30  
31  
32  
33  
34  
35  
36  
37  
38  
39  
40  
41  
42  
43  
44  
45  
46  
47  
48  
49  
50  
51  
52  
53  
54  
55  
56  
57  
58  
59  
60

For peer review only

**Figure legends**

**Figure 1** Restrictive cubic spline modeling of the association between NAFLD and TyG and its related parameters. Red area, 95% confidence interval. Each model was adjusted for gender, age, marital status, educational level, smoking, drinking, tea drinking, history of diabetes, and history of hypertension

**Figure 2** ROC curves of TyG and its related parameters and biochemical indexes

For peer review only

**Table 1** Univariate and multivariate logistic analysis of TyG and related parameters and MAFLD

| Variables | Crude model                |                 | Model 1 <sup>a</sup>       |                 | Model 2 <sup>b</sup>       |                 | Model 3 <sup>c</sup>       |                 |
|-----------|----------------------------|-----------------|----------------------------|-----------------|----------------------------|-----------------|----------------------------|-----------------|
|           | <i>OR</i> (95% <i>CI</i> ) | <i>P</i> -value |
| TyG       | 6.33 (5.27, 7.60)          | <0.001          | 4.96 (4.09, 6.01)          | <0.001          | 5.15 (4.23, 6.27)          | <0.001          | 4.89 (3.98, 6.00)          | <0.001          |
| TyG-WC    | 1.02 (1.01, 1.02)          | <0.001          | 1.01 (1.01, 1.02)          | <0.001          | 1.02 (1.01, 1.02)          | <0.001          | 1.01 (1.01, 1.02)          | <0.001          |
| TyG-BMI   | 1.05 (1.05, 1.05)          | <0.001          | 1.05 (1.04, 1.05)          | <0.001          | 1.05 (1.04, 1.05)          | <0.001          | 1.05 (1.04, 1.05)          | <0.001          |
| TyG-WHR   | 4.44 (3.89, 5.08)          | <0.001          | 4.18 (3.60, 4.87)          | <0.001          | 4.32 (3.70, 5.04)          | <0.001          | 4.08 (3.48, 4.78)          | <0.001          |

<sup>a</sup>: Adjusted for gender, age, marital status, and educational level;

<sup>b</sup>: Adjusted for gender, age, marital status, educational level, smoking, drinking, and tea drinking;

<sup>c</sup>: Adjusted for gender, age, marital status, educational level, smoking, drinking, tea drinking, history of diabetes, and history of hypertension.



**Table 2** Area under curve (AUC) analysis

| Variables               | AUC (95%CI)          | AIC    | Sensitivity% | Specificity% | optimal cut-off | P -value |
|-------------------------|----------------------|--------|--------------|--------------|-----------------|----------|
| TC(mmol/L)              | 0.588 (0.564, 0.613) | 3206.9 | 58.3%        | 58.6%        | 5.045           | <0.001   |
| GGT(mmol/L)             | 0.761 (0.742, 0.781) | 2982.7 | 74.8%        | 65.6%        | 24.500          | <0.001   |
| HDL(mmol/L)             | 0.711 (0.689, 0.732) | 3214.3 | 69.1%        | 63.4%        | 1.285           | 1.000    |
| TG(mg/dL)               | 0.784 (0.764, 0.803) | 3057.6 | 68.2%        | 78.0%        | 137.618         | <0.001   |
| FPG(mg/dL)              | 0.653 (0.629, 0.677) | 3085.7 | 55.1%        | 69.7%        | 95.67           | <0.001   |
| WC(cm)                  | 0.846 (0.830, 0.861) | 2378.3 | 80.2%        | 74.9%        | 84.500          | <0.001   |
| BMI(kg/m <sup>2</sup> ) | 0.822 (0.804, 0.839) | 2486.4 | 78.9%        | 72.5%        | 23.525          | <0.001   |
| FLI                     | 0.872 (0.859, 0.886) | 2809.1 | 87.5%        | 72.1%        | 0.419           | <0.001   |
| HSI                     | 0.821 (0.803, 0.838) | 2554.0 | 77.1%        | 73.3%        | 32.715          | <0.001   |
| TyG                     | 0.793 (0.774, 0.812) | 2676.8 | 72.2%        | 75.0%        | 8.738           | <0.001   |
| TyG-WC                  | 0.873 (0.860, 0.887) | 2199.6 | 88.7%        | 71.4%        | 716.743         | <0.001   |
| TyG-BMI                 | 0.862 (0.847, 0.876) | 2239.1 | 85.3%        | 73.3%        | 203.154         | <0.001   |
| TyG-WHR                 | 0.836 (0.820, 0.852) | 2448.0 | 84.6%        | 67.7%        | 7.444           | <0.001   |

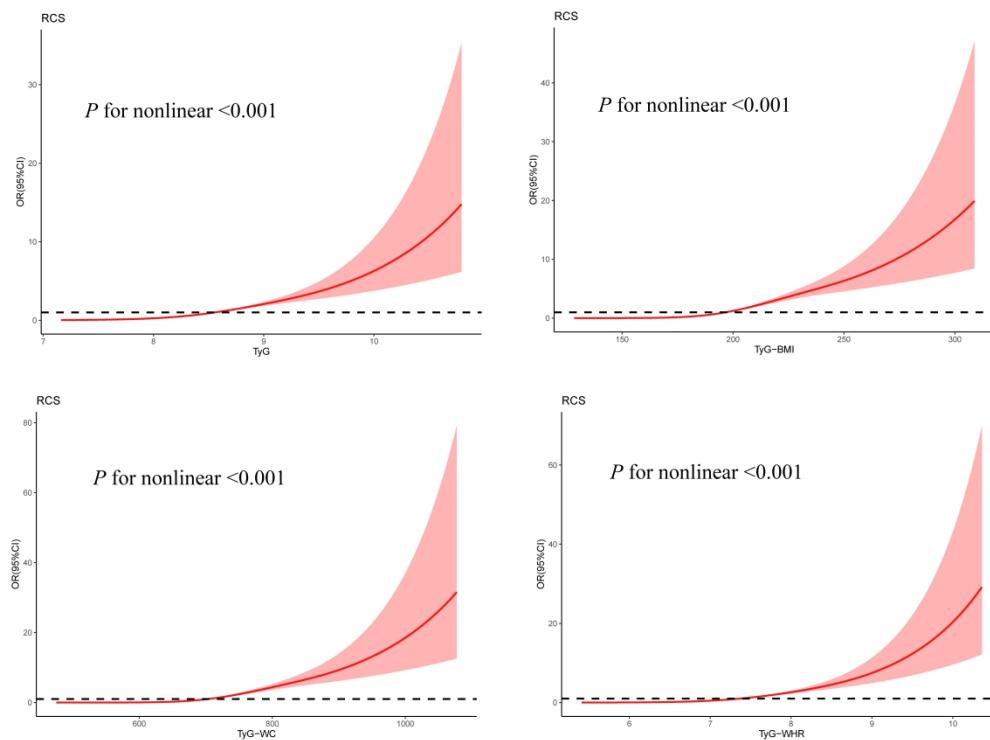

Figure 1 Restrictive cubic spline modeling of the association between NAFLD and TyG and its related parameters. Red area, 95% confidence interval. Each model was adjusted for gender, age, marital status, educational level, smoking, drinking, tea drinking, history of diabetes, and history of hypertension

400x294mm (300 x 300 DPI)

1  
2  
3  
4  
5  
6  
7  
8  
9  
10  
11  
12  
13  
14  
15  
16  
17  
18  
19  
20  
21  
22  
23  
24  
25  
26  
27  
28  
29  
30  
31  
32  
33  
34  
35  
36  
37  
38  
39  
40  
41  
42  
43  
44  
45  
46  
47  
48  
49  
50  
51  
52  
53  
54  
55  
56  
57  
58  
59  
60

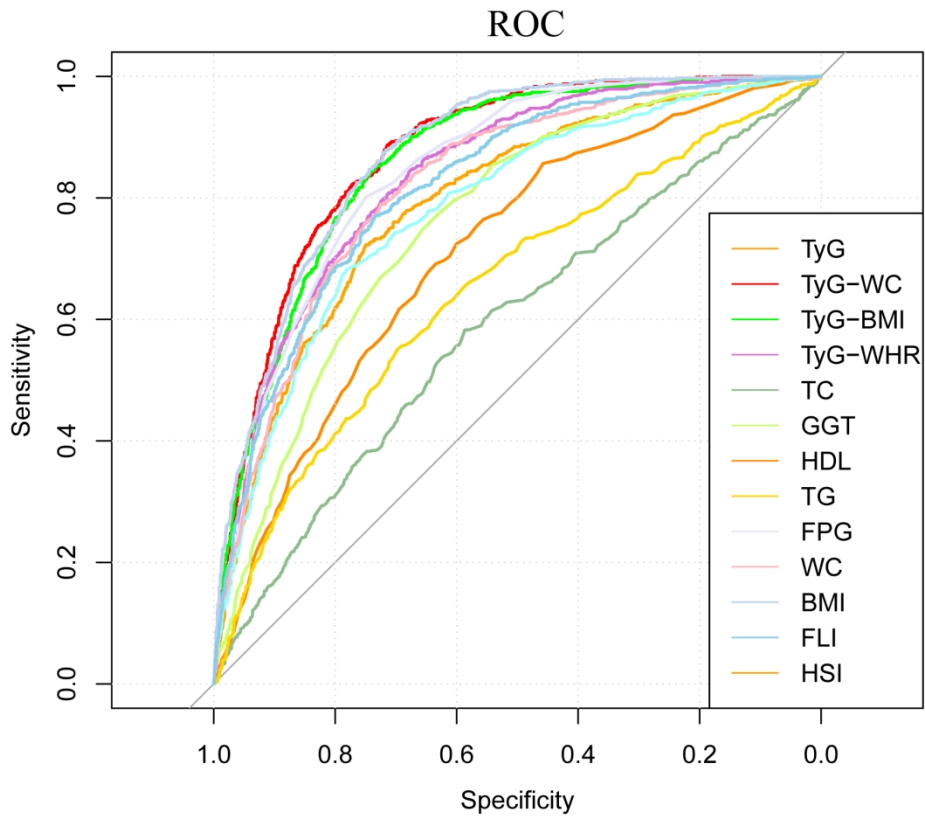

Figure 2 ROC curves of TyG and its related parameters and biochemical indexes

166x141mm (300 x 300 DPI)

**Supplementary Table 1** Comparison of general characteristics

| Variables                 | Overall<br>(n=2605) | With MAFLD<br>(n=726) | Without MAFLD<br>(n=1879) | P-value* |
|---------------------------|---------------------|-----------------------|---------------------------|----------|
| Age(years), M (IQR)       | 45 (33, 52)         | 43 (31, 51)           | 48 (38, 54)               | <0.001   |
| Gender, n (%)             |                     |                       |                           | <0.001   |
| Males                     | 1471 (56.5)         | 584 (80.4)            | 887 (47.2)                |          |
| Females                   | 1134 (43.5)         | 142 (19.6)            | 992 (52.8)                |          |
| Marital Status, n (%)     |                     |                       |                           | <0.001   |
| Single                    | 378 (14.5)          | 68 (9.4)              | 310 (16.5)                |          |
| Married                   | 2209 (84.8)         | 652 (89.8)            | 1557 (82.9)               |          |
| Divorced                  | 9 (0.4)             | 2 (0.3)               | 7 (0.4)                   |          |
| Widowed                   | 9 (0.4)             | 4 (0.6)               | 5 (0.3)                   |          |
| Educational level, n (%)  |                     |                       |                           | 0.032    |
| Bachelor degree or above  | 913 (35.1)          | 228 (31.4)            | 685 (36.5)                |          |
| Junior college            | 603 (23.2)          | 172 (23.7)            | 431 (22.9)                |          |
| Senior high school        | 593 (22.8)          | 189 (26.0)            | 404 (21.5)                |          |
| Junior high school        | 319 (12.3)          | 87 (12.0)             | 232 (12.3)                |          |
| Primary school            | 140 (5.4)           | 35 (4.8)              | 105 (5.6)                 |          |
| Illiteracy                | 37 (1.4)            | 15 (2.1)              | 22 (1.2)                  |          |
| Income(yuan/month), n (%) |                     |                       |                           | 0.066    |
| <2000                     | 147 (5.6)           | 35 (4.8)              | 112 (6.0)                 |          |
| 2000~3000                 | 794 (30.5)          | 202 (27.8)            | 592 (31.5)                |          |
| ≥3000                     | 1664 (63.9)         | 489 (67.4)            | 1175 (62.5)               |          |
| Smoking status, n (%)     |                     |                       |                           | <0.001   |
| Never                     | 1916 (73.6)         | 448 (61.7)            | 1468 (78.1)               |          |
| Former                    | 113 (4.3)           | 45 (6.2)              | 68 (3.6)                  |          |
| Current                   | 576 (22.1)          | 233 (32.1)            | 343 (18.3)                |          |
| Drinking status, n (%)    |                     |                       |                           | <0.001   |
| Never                     | 1624 (62.3)         | 389 (53.6)            | 1235 (65.7)               |          |

|                                |             |            |             |        |
|--------------------------------|-------------|------------|-------------|--------|
| Former                         | 42 (1.6)    | 15 (2.1)   | 27 (1.4)    |        |
| Current                        | 939 (36.1)  | 322 (44.4) | 617 (32.8)  |        |
| Tea drinking status, n (%)     |             |            |             | <0.001 |
| Never                          | 1052 (40.4) | 205 (28.2) | 847 (45.1)  |        |
| Former                         | 8 (0.3)     | 3 (0.4)    | 5 (0.3)     |        |
| Current                        | 1545 (59.3) | 518 (71.3) | 1027 (54.7) |        |
| History of diabetes, n (%)     |             |            |             | <0.001 |
| No                             | 2459 (94.4) | 650 (89.5) | 1809 (96.3) |        |
| Yes                            | 146 (5.6)   | 76 (10.5)  | 70 (3.7)    |        |
| History of hypertension, n (%) |             |            |             | <0.001 |
| No                             | 1666 (64.0) | 294 (40.5) | 1372 (73.0) |        |
| Yes                            | 939 (36.1)  | 432 (59.5) | 507 (27.0)  |        |

Data are presented as median with the interquartile range [M (P25, P75)]. \* Comparison of the differences between the groups calculated by Mann-Whitney U test or chi-square test.

For peer review only

**Supplementary Table 2** Evaluation of biochemical indices

| Variables                       | Overall<br>(n=2605)  | With MAFLD<br>(n=726) | Without MAFLD<br>(n=1879) | P-value* |
|---------------------------------|----------------------|-----------------------|---------------------------|----------|
| BMI(kg/m <sup>2</sup> ), M(IQR) | 22.9 (20.8, 25.1)    | 25.4 (23.9, 27.0)     | 22.0 (20.3, 23.8)         | <0.001   |
| SBP (mmHg), M(IQR)              | 118 (110, 128)       | 125 (118, 136)        | 115 (107, 123)            | <0.001   |
| DBP (mmHg), M(IQR)              | 80 (72, 86)          | 85 (80, 90)           | 78 (70, 82)               | <0.001   |
| TG(mg/dL), M (IQR)              | 109.7 (79.7, 163.8)  | 169.0 (118.6, 243.4)  | 94.7 (73.5, 131.9)        | <0.001   |
| FPG(mg/dL), M (IQR)             | 93.1 (88.4, 99.7)    | 96.7 (91.1, 106.4)    | 92.2 (87.7, 97.2)         | <0.001   |
| TC(mmol/L), M (IQR)             | 5.0 (4.5, 5.6)       | 5.2 (4.7, 5.9)        | 5.0 (4.4, 5.5)            | 0.007    |
| GGT(U/L), M (IQR)               | 23 (16, 36)          | 34 (24, 52)           | 20 (15, 29)               | <0.001   |
| HDL(mmol/L), M (IQR)            | 1.3 (1.1, 1.5)       | 1.2 (1.0, 1.3)        | 1.4 (1.2, 1.5)            | <0.001   |
| WC(cm), M(IQR)                  | 82 (75, 89)          | 90 (85, 95)           | 78 (70, 85)               | <0.001   |
| WHR, M (IQR)                    | 0.9 (0.8, 0.9)       | 0.9 (0.9, 0.9)        | 0.84 (0.8, 0.9)           | <0.001   |
| FLI, M (IQR)                    | 0.3 (0.1, 1.1)       | 1.4 (0.6, 3.4)        | 0.2 (0.1, 0.5)            | <0.001   |
| HSI, M (IQR)                    | 31.6 (28.5, 34.8)    | 35.5 (32.9, 38.6)     | 30.2 (27.7, 32.9)         | <0.001   |
| TyG, M (IQR)                    | 8.6 (8.2, 9.0)       | 9.0 (8.7, 9.4)        | 8.4 (8.1, 8.7)            | <0.001   |
| TyG-WC, M (IQR)                 | 703.1 (623.9, 790.6) | 814.6 (759.2, 875.4)  | 660.9 (600.3, 730.5)      | <0.001   |
| TyG-BMI, M (IQR)                | 197.0 (174.2, 222.6) | 228.8 (211.0, 248.9)  | 184.3 (167.4, 205.1)      | <0.001   |
| TyG-WHR, M (IQR)                | 7.4 (6.7, 8.1)       | 8.2 (7.7, 8.7)        | 7.1 (6.5, 7.7)            | <0.001   |

Data are presented as median with the interquartile range [M (P25, P75)]. \* Comparison of the differences between the groups calculated by Mann-Whitney U test.

Supplement Table 3 NRI and IDI analyses

| Variables               | NRI (95%CI)             | P-value | IDI (95%CI)             | P-value |
|-------------------------|-------------------------|---------|-------------------------|---------|
| TyG                     | Reference               | <0.001  | Reference               | <0.001  |
| TC(mmol/L)              | -0.437 (-0.479, -0.395) | <0.001  | -0.199 (-0.216, -0.182) | <0.001  |
| GGT(mmol/L)             | -0.249 (-0.298, -0.195) | <0.001  | -0.110 (-0.127, -0.092) | <0.001  |
| HDL(mmol/L)             | -0.169 (-0.214, -0.121) | <0.001  | -0.119 (-0.136, -0.101) | <0.001  |
| TG(mg/dL)               | -0.200 (-0.231, -0.169) | <0.001  | -0.053 (-0.059, -0.046) | <0.001  |
| FPG(mg/dL)              | -0.661 (-0.695, -0.626) | <0.001  | -0.208 (-0.226, -0.191) | <0.001  |
| WC(cm)                  | 0.150 (0.097, 0.202)    | <0.001  | 0.091 (0.067, 0.115)    | <0.001  |
| BMI(kg/m <sup>2</sup> ) | 0.113 (0.061, 0.167)    | <0.001  | 0.051 (0.027, 0.076)    | <0.001  |
| FLI                     | 0.112 (0.060, 0.165)    | <0.001  | 0.033 (0.015, 0.051)    | <0.001  |
| HSI                     | 0.059 (-0.005, 0.123)   | 0.068   | 0.048 (0.024, 0.072)    | <0.001  |
| TyG-WC                  | 0.264 (0.212, 0.316)    | <0.001  | 0.148 (0.129, 0.160)    | <0.001  |
| TyG-BMI                 | 0.187 (0.122, 0.258)    | <0.001  | 0.125 (0.107, 0.143)    | <0.001  |
| TyG-WHR                 | 0.125 (0.087, 0.167)    | <0.001  | 0.071 (0.059, 0.083)    | <0.001  |

STROBE Statement—Checklist of items that should be included in reports of *cross-sectional studies*

|                           | Item No | Recommendation                                                                                                                                                                                               | Page No |
|---------------------------|---------|--------------------------------------------------------------------------------------------------------------------------------------------------------------------------------------------------------------|---------|
| <b>Title and abstract</b> | 1       | (a) Indicate the study's design with a commonly used term in the title or the abstract                                                                                                                       | 1       |
|                           |         | (b) Provide in the abstract an informative and balanced summary of what was done and what was found                                                                                                          | 1       |
| <b>Introduction</b>       |         |                                                                                                                                                                                                              |         |
| Background/rationale      | 2       | Explain the scientific background and rationale for the investigation being reported                                                                                                                         | 3       |
| Objectives                | 3       | State specific objectives, including any prespecified hypotheses                                                                                                                                             | 5       |
| <b>Methods</b>            |         |                                                                                                                                                                                                              |         |
| Study design              | 4       | Present key elements of study design early in the paper                                                                                                                                                      | 5       |
| Setting                   | 5       | Describe the setting, locations, and relevant dates, including periods of recruitment, exposure, follow-up, and data collection                                                                              | 5       |
| Participants              | 6       | (a) Give the eligibility criteria, and the sources and methods of selection of participants                                                                                                                  | 5       |
| Variables                 | 7       | Clearly define all outcomes, exposures, predictors, potential confounders, and effect modifiers. Give diagnostic criteria, if applicable                                                                     | 6       |
| Data sources/measurement  | 8*      | For each variable of interest, give sources of data and details of methods of assessment (measurement). Describe comparability of assessment methods if there is more than one group                         | 6       |
| Bias                      | 9       | Describe any efforts to address potential sources of bias                                                                                                                                                    | 11      |
| Study size                | 10      | Explain how the study size was arrived at                                                                                                                                                                    | 5       |
| Quantitative variables    | 11      | Explain how quantitative variables were handled in the analyses. If applicable, describe which groupings were chosen and why                                                                                 | 6       |
| Statistical methods       | 12      | (a) Describe all statistical methods, including those used to control for confounding                                                                                                                        | 77      |
|                           |         | (b) Describe any methods used to examine subgroups and interactions                                                                                                                                          | 7       |
|                           |         | (c) Explain how missing data were addressed                                                                                                                                                                  | 7       |
|                           |         | (d) If applicable, describe analytical methods taking account of sampling strategy                                                                                                                           | 7       |
|                           |         | (e) Describe any sensitivity analyses                                                                                                                                                                        | 7       |
| <b>Results</b>            |         |                                                                                                                                                                                                              |         |
| Participants              | 13*     | (a) Report numbers of individuals at each stage of study—eg numbers potentially eligible, examined for eligibility, confirmed eligible, included in the study, completing follow-up, and analysed            | 8       |
|                           |         | (b) Give reasons for non-participation at each stage                                                                                                                                                         | 8       |
|                           |         | (c) Consider use of a flow diagram                                                                                                                                                                           | 8       |
| Descriptive data          | 14*     | (a) Give characteristics of study participants (eg demographic, clinical, social) and information on exposures and potential confounders                                                                     | 8       |
|                           |         | (b) Indicate number of participants with missing data for each variable of interest                                                                                                                          | 8       |
| Outcome data              | 15*     | Report numbers of outcome events or summary measures                                                                                                                                                         | 8       |
| Main results              | 16      | (a) Give unadjusted estimates and, if applicable, confounder-adjusted estimates and their precision (eg, 95% confidence interval). Make clear which confounders were adjusted for and why they were included | 8       |



|                          |    |                                                                                                                                                                            |    |
|--------------------------|----|----------------------------------------------------------------------------------------------------------------------------------------------------------------------------|----|
|                          |    | (b) Report category boundaries when continuous variables were categorized                                                                                                  | 8  |
|                          |    | (c) If relevant, consider translating estimates of relative risk into absolute risk for a meaningful time period                                                           | 8  |
| Other analyses           | 17 | Report other analyses done—eg analyses of subgroups and interactions, and sensitivity analyses                                                                             | 8  |
| <b>Discussion</b>        |    |                                                                                                                                                                            |    |
| Key results              | 18 | Summarise key results with reference to study objectives                                                                                                                   | 9  |
| Limitations              | 19 | Discuss limitations of the study, taking into account sources of potential bias or imprecision. Discuss both direction and magnitude of any potential bias                 | 11 |
| Interpretation           | 20 | Give a cautious overall interpretation of results considering objectives, limitations, multiplicity of analyses, results from similar studies, and other relevant evidence | 10 |
| Generalisability         | 21 | Discuss the generalisability (external validity) of the study results                                                                                                      | 9  |
| <b>Other information</b> |    |                                                                                                                                                                            |    |
| Funding                  | 22 | Give the source of funding and the role of the funders for the present study and, if applicable, for the original study on which the present article is based              | 12 |

\*Give information separately for exposed and unexposed groups.

**Note:** An Explanation and Elaboration article discusses each checklist item and gives methodological background and published examples of transparent reporting. The STROBE checklist is best used in conjunction with this article (freely available on the Web sites of PLoS Medicine at <http://www.plosmedicine.org/>, Annals of Internal Medicine at <http://www.annals.org/>, and Epidemiology at <http://www.epidem.com/>). Information on the STROBE Initiative is available at [www.strobe-statement.org](http://www.strobe-statement.org).

# BMJ Open

## The Diagnostic Value of Triglyceride-Glucose Index and Related Parameters in Metabolism-associated Fatty Liver Disease in a Chinese Population

|                                 |                                                                                                                                                                                                                                                                                                                                                                                                                                                                                                                                                                                                                                                                                                                                                                                                         |
|---------------------------------|---------------------------------------------------------------------------------------------------------------------------------------------------------------------------------------------------------------------------------------------------------------------------------------------------------------------------------------------------------------------------------------------------------------------------------------------------------------------------------------------------------------------------------------------------------------------------------------------------------------------------------------------------------------------------------------------------------------------------------------------------------------------------------------------------------|
| Journal:                        | <i>BMJ Open</i>                                                                                                                                                                                                                                                                                                                                                                                                                                                                                                                                                                                                                                                                                                                                                                                         |
| Manuscript ID                   | bmjopen-2023-075413.R1                                                                                                                                                                                                                                                                                                                                                                                                                                                                                                                                                                                                                                                                                                                                                                                  |
| Article Type:                   | Original research                                                                                                                                                                                                                                                                                                                                                                                                                                                                                                                                                                                                                                                                                                                                                                                       |
| Date Submitted by the Author:   | 07-Aug-2023                                                                                                                                                                                                                                                                                                                                                                                                                                                                                                                                                                                                                                                                                                                                                                                             |
| Complete List of Authors:       | Yu, Rong; Fujian Medical University, Department of Epidemiology and Health Statistics<br>Xie, Weijiang; Fujian Medical University, Department of Epidemiology and Health Statistics<br>Peng, Hewei; Fujian Medical University, Department of Epidemiology and Health Statistics<br>Lu, Lili; General Administration of Customs of the People's Republic of China, Xiamen Customs, People's Republic of China<br>Yin, Shuo; Fujian Medical University, Department of Epidemiology and Health Statistics<br>xu, shanghua; Department of Cardiology, Affiliated Nanping First Hospital, Fujian Medical University<br>Hu, Zhijian; Fujian Medical University, Department of Epidemiology and Health Statistics<br>Peng, Xian-E; Fujian Medical University, Department of Epidemiology and Health Statistics |
| <b>Primary Subject Heading</b>: | Public health                                                                                                                                                                                                                                                                                                                                                                                                                                                                                                                                                                                                                                                                                                                                                                                           |
| Secondary Subject Heading:      | Epidemiology                                                                                                                                                                                                                                                                                                                                                                                                                                                                                                                                                                                                                                                                                                                                                                                            |
| Keywords:                       | EPIDEMIOLOGY, Hepatology < INTERNAL MEDICINE, Lipid disorders < DIABETES & ENDOCRINOLOGY                                                                                                                                                                                                                                                                                                                                                                                                                                                                                                                                                                                                                                                                                                                |
|                                 |                                                                                                                                                                                                                                                                                                                                                                                                                                                                                                                                                                                                                                                                                                                                                                                                         |

SCHOLARONE™  
Manuscripts



I, the Submitting Author has the right to grant and does grant on behalf of all authors of the Work (as defined in the below author licence), an exclusive licence and/or a non-exclusive licence for contributions from authors who are: i) UK Crown employees; ii) where BMJ has agreed a CC-BY licence shall apply, and/or iii) in accordance with the terms applicable for US Federal Government officers or employees acting as part of their official duties; on a worldwide, perpetual, irrevocable, royalty-free basis to BMJ Publishing Group Ltd ("BMJ") its licensees and where the relevant Journal is co-owned by BMJ to the co-owners of the Journal, to publish the Work in this journal and any other BMJ products and to exploit all rights, as set out in our [licence](#).

The Submitting Author accepts and understands that any supply made under these terms is made by BMJ to the Submitting Author unless you are acting as an employee on behalf of your employer or a postgraduate student of an affiliated institution which is paying any applicable article publishing charge ("APC") for Open Access articles. Where the Submitting Author wishes to make the Work available on an Open Access basis (and intends to pay the relevant APC), the terms of reuse of such Open Access shall be governed by a Creative Commons licence – details of these licences and which [Creative Commons](#) licence will apply to this Work are set out in our licence referred to above.

Other than as permitted in any relevant BMJ Author's Self Archiving Policies, I confirm this Work has not been accepted for publication elsewhere, is not being considered for publication elsewhere and does not duplicate material already published. I confirm all authors consent to publication of this Work and authorise the granting of this licence.

1  
2  
3 **1 The Diagnostic Value of Triglyceride-Glucose Index and Related**  
4  
5  
6 **2 Parameters in Metabolism-associated Fatty Liver Disease in a Chinese**  
7  
8  
9 **3 Population**

10  
11 4 Rong Yu<sup>1†</sup>, Weijiang Xie<sup>1†</sup>, Hewei Peng<sup>1†</sup>, Lili Lu<sup>2</sup>, Shuo Yin<sup>1</sup> Shanghua Xu<sup>4</sup>, Zhijian  
12  
13  
14 5 Hu<sup>1</sup>, and Xian-E Peng<sup>1,3\*</sup>

15  
16 6 \* Corresponding author

17  
18 7 Xian-E Peng

19  
20 8 Mail address: Department of Epidemiology and Health Statistics, Xuefu North Road  
21  
22 9 1st, Shangjie Town, Minhou Country, Fuzhou, Fujian, 350108, China.

23  
24  
25 10 Tel and Fax: +86-591-22862648

26  
27  
28 11 Email: [fmuxe@163.com](mailto:fmuxe@163.com)

29  
30 12 1 Department of Epidemiology and Health Statistics, Fujian Provincial Key Laboratory  
31  
32 13 of Environment Factors and Cancer, School of Public Health, Fujian Medical  
33  
34 14 University, Fuzhou, 350122, People's Republic of China

35  
36  
37 15 2 Xiamen Customs, People's Republic of China, Xiamen 361006, People's Republic of  
38  
39 16 China

40  
41 17 3 Key Laboratory of Ministry of Education for Gastrointestinal Cancer, Fujian Medical  
42  
43 18 University, Fuzhou 350108, People's Republic of China

44  
45  
46 19 4 Department of Cardiology, Affiliated Nanping First Hospital, Fujian Medical  
47  
48 20 University, Nanping, China, 353000, People's Republic of China

49  
50  
51 21

52  
53 22 † These authors contributed equally to this work

54  
55  
56 23

57  
58 24 Word count: 2825

## 25 Abstract

26 **Objective** To explore the diagnostic value of Triglyceride-Glucose (TyG) and its  
27 related parameters in metabolism-associated fatty liver disease (MAFLD).

28 **Design** A cross-sectional study of local residents who attended medical checkups at the  
29 First Hospital of Nanping City, Fujian Medical University, between 2015 and 2017.

30 **Setting** One participation center.

31 **Participants** 2605 subjects met the inclusion-exclusion criteria. Subjects were grouped  
32 according to whether they had MAFLD or not.

33 **Results** The TyG index and its associated parameters are positively associated with the  
34 risk of developing MAFLD ( $P < 0.001$ ). Restriction cube spline (RCS) analysis showed  
35 a significant dose-response relationship between the TyG index and MAFLD. The risk  
36 of developing MAFLD increases significantly with increasing levels of TyG. After  
37 adjusting for confounders, this relationship remains ( $OR: 4.89, 95\%CI: 3.98-6.00$ ). The  
38 areas under the receiver operating characteristic curves (AUROC) of the TyG index for  
39 MAFLD detection were 0.793 (0.774-0.812). The areas under curve (AUC) of TyG-  
40 related parameters were improved, among which TyG-waist circumference (TyG-WC)  
41 showed the largest AUC for MAFLD detection (0.873, 95%CI: 0.860-0.887). In  
42 addition, the best cut-off value of the TyG-WC was 716.743 with a sensitivity and  
43 specificity of 88.7% and 71.4%, respectively.

44 **Conclusion** The TyG index is effective in identifying MAFLD, and the TyG-related  
45 parameters improved the identification and diagnosis of MAFLD, suggesting that TyG-  
46 related parameters, especially TyG-WC may be a useful marker for identifying  
47 MAFLD.

48 **Keywords:** Metabolic-associated Fatty Liver Disease; Triglyceride-Glucose; TyG  
49 Related Parameters

## 50 **Strengths and limitations of this study**

- 51 ● We combined metabolic-related indices with TyG index to diagnose MFALD with  
52 a comprehensive index.
- 53 ● In this study, the latest diagnostic criteria were used to define MAFLD.
- 54 ● The strengths of this study are the large sample size and the rigorous screening of  
55 subjects. And more comprehensive confounding variables are considered.
- 56 ● Measurement error in self-reported dietary habits and other data in this study is  
57 unavoidable.

## 58 **Introduction**

59 Non-alcoholic fatty liver disease (NAFLD), with hepatic steatosis as the main  
60 pathological manifestation, can progress to cirrhosis and hepatocellular  
61 carcinoma(HCC)(1, 2), affecting approximately one-quarter of the adult population  
62 worldwide(3). In recent years, there has been increasing recognition of the inherent  
63 flaws in the term "non-alcoholic". It overemphasizes the presence or absence of alcohol  
64 use disorders and ignores the importance of metabolic risk for NAFLD progression. As  
65 such, an international panel of experts renamed NAFLD to metabolism-associated fatty  
66 liver disease (MAFLD) in 2020(4). MAFLD is used as a more appropriate disease  
67 designation to describe liver diseases associated with metabolic dysfunction(5). Due to  
68 its high global prevalence, it poses a serious threat to human health and a huge economic  
69 burden to society(6). Steatosis is a reversible condition in its early stages and can be  
70 addressed through behavioral changes(7, 8). For example, increasing physical activity  
71 and controlling energy intake are particularly effective interventions in the early stages  
72 of the disease(9, 10). However, the aggressive form of steatohepatitis can progress to  
73 fibrosis and eventually cirrhosis, which is irreversible damage(11). Due to the high  
74 prevalence of MAFLD and its progressive nature, the early detection of MAFLD is of

1  
2  
3 75 great significance to enable the provision of early intervention, thus avoiding the  
4  
5 76 progression of MAFLD(12).  
6

7  
8 77 Although the gold standard for identifying fatty liver disease (FLD) is still liver  
9  
10 78 biopsy, it is unsuitable for large-scale epidemiological surveys because of its  
11  
12 79 invasiveness, poor acceptability, cost, and sampling variability(12). Thus, it is  
13  
14 80 necessary to develop a simple tool to identify MAFLD. Significant progress has been  
15  
16 81 made in the noninvasive assessment of FLD in recent years, including fatty liver index  
17  
18 82 (FLI) and hepatic steatosis index (HSI)(13). The FLI is a prevalent biomarker panel  
19  
20 83 consisting of body mass index (BMI), waist circumference, triglycerides, and gamma-  
21  
22 84 glutamyl transferase (14). The HSI is a biomarker panel consisting of BMI, diabetes,  
23  
24 85 and the alanine transaminase(ALT)/aspartate transaminase(AST) ratio (15). However,  
25  
26 86 the calculation process of both indices is more complicated and involves more traits  
27  
28 87 and indicators. An ideal non-invasive test should be simple, easily accessible, cost-  
29  
30 88 effective, and efficient, and allow easy visualization to detect and identify people at  
31  
32 89 high risk of MAFLD(16). With such a test, large-scale population-wide screening and  
33  
34 90 preventive programs in large populations would be possible. Prior studies have  
35  
36 91 confirmed that insulin resistance (IR) is an important pathogenic mechanism in  
37  
38 92 MAFLD(17). Homeostasis model assessment of insulin resistance (HOMA-IR) is the  
39  
40 93 gold standard diagnostic method of IR and has an excellent diagnostic effect on  
41  
42 94 MAFLD(18). However, HOMA-IR is costly, time-consuming, and complex, which  
43  
44 95 limits its widespread implementation in large epidemiological investigations(19). TyG,  
45  
46 96 a non-invasive index, calculated from fasting glucose and triglycerides, has been  
47  
48 97 proposed as a reliable marker for IR in clinical practice(20). Since MAFLD is  
49  
50 98 associated with IR and dyslipidemia, the TyG index is also considered a useful  
51  
52 99 predictive marker for MAFLD(21). However, the results from epidemiological studies  
53  
54  
55  
56  
57  
58  
59  
60

1  
2  
3 100 remained controversial(22). The longitudinal association between baseline TyG index  
4  
5 101 and the risk of MAFLD was assessed in a cohort study conducted in Jiangsu, China,  
6  
7 102 which included 2056 subjects(21). The results showed that the TyG index was  
8  
9 103 independently associated with the risk of developing MAFLD (*HR*: 1.784, 95%*CI*:  
10  
11 104 1.383-2.302, *P*< 0.001)(21). A cross-sectional study in US adults also showed a positive  
12  
13 105 association between the TyG index and the risk of MAFLD/NAFLD, as for MAFLD,  
14  
15 106 TyG-WC presented the highest *OR* (*OR*: 28.435, 95%*CI*: 12.121-66.705)(23). However,  
16  
17 107 the sample sizes of these studies were small, and more large prospective studies are  
18  
19 108 needed to further validate the association between the two. Nanping city is located in  
20  
21 109 the north of Fujian Province. Our previous study reported the prevalence of NAFLD  
22  
23 110 (32.8%) in the population with physical examination in Nanping(24), which is higher  
24  
25 111 than other city of Fujian province(25). The present study aimed to investigate the  
26  
27 112 association of the TyG index and its related parameters with MAFLD in Nanping and  
28  
29 113 to assess their diagnostic efficacy for MAFLD.

## 114 **Material and Methods**

### 115 **Study subjects and design**

116 This cross-sectional study included 2605 subjects who underwent a physical  
117 examination and completed an abdominal ultrasound examination at Nanping First  
118 Hospital, Fujian Medical University (Nanping, China) between April 2015 and August  
119 2017. The study protocol conformed to the ethical guidelines of the 1,975 Declaration  
120 of Helsinki (6th revision, 2008) and was approved by the Ethics Committee of Fujian  
121 Medical University(ethical approval number 2014096). All the participants provided  
122 their informed consent before the study started.

123 The inclusion criteria for participants in the current study were permanent  
124 residency in Nanping and age between 18 and 75 years and completed ultrasonography



1  
2  
3 125 examination. The diagnosis of FLD in this study was primarily based on  
4  
5 126 ultrasonographic findings rather than a liver biopsy(26). This is because recent  
6  
7 127 standardized criteria have significantly improved the diagnostic accuracy of  
8  
9 128 ultrasonography so that even minor degrees of steatosis can be detected. Subjects with  
10  
11 129 malignant tumors, incomplete data, or pregnant or lactating women were excluded.

### 130 **Data collection and measure**

131 Data on MAFLD risk factors were obtained through direct interviews with the help  
132 of a structured medical questionnaire. The risk factors included were age, gender,  
133 marital status, income, educational level, smoking, drinking, lifestyle, dietary habits,  
134 medical history, and family history of MAFLD. All subjects underwent a complete  
135 physical examination in the morning after an overnight fast. The clinical variables  
136 collected were height (m<sup>2</sup>), weight (kg), waist circumference (WC, cm), hip  
137 circumference (HC, cm), Waist-to-Hip Ratio (WHR), diastolic blood pressure (DBP,  
138 mmHg), and systolic blood pressure (SBP, mmHg), serum triglyceride (TG, mg/dL),  
139 total cholesterol (TC, mmol/L), low-density lipoprotein (LDL, mmol/L), and high-  
140 density lipoprotein (HDL, mmol/L), fasting plasma glucose (FPG, mg/dL), Gamma-  
141 glutamyltransferase (GGT, U/L) alanine transaminase(ALT, U/L), and aspartate  
142 aminotransferase (AST, U/L). All these variables were assessed using standard  
143 procedures (TG: 1mmol/L=88.5mg/dL; FPG: 1mmol/L=18mg/dL). Body mass index  
144 (BMI) was calculated as body weight/(height)<sup>2</sup>. Food consumption was assessed with  
145 the help of a food frequency questionnaire, and total consumption was calculated by  
146 multiplying the frequency of food consumption by the amount of food consumed each  
147 time. Hypertension was defined as systolic blood pressure  $\geq$ 140 mmHg and/or diastolic  
148 blood pressure  $\geq$ 90 mmHg, or the current use of anti-hypertensive medication(27).  
149 Diabetes was defined as fasting plasma glucose  $\geq$ 7.0 mmol/L or the current use of

150 hypoglycemic agents(28).

### 151 **Triglyceride-Glucose Index and Related Parameters**

152 The TyG index and its related parameters were calculated according to the  
153 previous studies(20, 26). The specific calculation formulas were as follows:

154 (1)  $TyG = \ln [\text{fasting triglyceride (mg/dl)} \times \text{fasting plasma glucose (mg/dl)} / 2]$ ;

155 (2)  $TyG-WC = TyG \times WC$ ;

156 (3)  $TyG-BMI = TyG \times BMI$ ;

157 (4)  $TyG-WHR = TyG \times WHR$ ;

### 158 **Diagnostic of FLD**

159 Liver ultrasonography is used to diagnose fatty liver. The presence of criteria (i)  
160 and any of criteria (ii) through (iv) indicates the presence of fatty liver: (i) Diffuse  
161 enhancement of the near-field echoes of the liver and gradual attenuation of the far-  
162 field echoes of the liver; (ii) Mild to moderate hepatomegaly with rounded obtuse  
163 borders; (iii) unclear structure of intrahepatic ducts; (iv) Reduced hepatic blood flow  
164 signal.

### 165 **Diagnosis of MAFLD**

166 MAFLD is diagnosed by ultrasound showing hepatic steatosis and having one of  
167 the following three criteria(3): (1) overweight or obesity ( $BMI \geq 23.0 \text{ kg/m}^2$  for Asians);  
168 (2) type 2 diabetes mellitus (T2DM); and (3) metabolic dysregulation among non-  
169 overweight individuals ( $BMI < 23.0 \text{ kg/m}^2$ ). Metabolic disorder was defined as the  
170 presence of at least two of the following metabolic risk abnormalities: (1)  $WC \geq 90$   
171 cm for Asian men and 80 cm for Asian women; (2)  $BP \geq 130/85$  mmHg or specific  
172 drug treatment; (3)  $TG \geq 1.70$  mmol/L or specific drug treatment; (4)  $HDL-c < 1.0$

1  
2  
3  
4 173 mmol/L for men and  $< 1.3$  mmol/L for women; (5) prediabetes; (6) HOMA-IR  $\geq 2.5$ ;  
5  
6  
7 174 and (7) C-reactive protein (CRP)  $> 2$  mg/L. Non-overweight individuals meeting any  
8  
9 175 two and more of the metabolic disorders are diagnosed as MAFLD.

## 11 176 **Statistical Analyses**

13 177 The baseline characteristics of subjects were analyzed using the Nonparametric  
14  
15  
16 178 Kruskal-Wallis test for non-normal continuous variables and the Chi-Square test for  
17  
18 179 nominal variables. Continuous variables were expressed as median (interquartile range,  
19  
20 180 IQR). Univariate and multivariate logistic regression methods were used to analyze the  
21  
22  
23 181 association of TyG and its related parameters with MAFLD risk. The restricted cubic  
24  
25 182 spline (RCS) was used to explore the dose-response relationship between TyG and its  
26  
27 183 related parameters and the risk of MAFLD. The predictive value of TyG and related  
28  
29 184 parameters were compared using the area under receiver operating characteristic  
30  
31  
32 185 (AUROC). The Net Reclassification Index (NRI) and the Integrated Discrimination  
33  
34 186 Improvement Index (IDI) were used to reflect the overall improvement of the diagnostic  
35  
36 187 model. All analyses were performed in R (version 4.2.1, R Foundation) software or  
37  
38  
39 188 Statistical Product and Service Solutions (SPSS) 26.0 software. All *P* values were based  
40  
41 189 on the two-sided test, and  $P < 0.05$  was considered statistically significant.

## 43 190 **Patient and Public Involvement**

45 191 Patients and public will not be involved in the development of the research  
46  
47  
48 192 question or in the design of the study. Subjects will receive oral and written information  
49  
50 193 about this study. However, they will not be involved in the recruitment and conduct of  
51  
52  
53 194 the study. After signing informed consent, the participants will be assessed for  
54  
55 195 eligibility and data collection will begin. Eligible subjects will be interviewed face to  
56  
57 196 face by investigators to collect data. In addition, all methods were performed in

1  
2  
3 197 accordance with the relevant guidelines and regulations.  
4

## 5 198 **Results**

### 6 199 **Baseline characteristics**

10 200 Demographic and lifestyle habits and clinical characteristics were detailed in  
11  
12 201 Table 1 and Table 2. Of the 2605 participants, 747 had FLD, with a FLD prevalence of  
13  
14 202 28.68%; 726 were MAFLD patients, and the prevalence of MAFLD was 27.9%. The  
15  
16 203 mean age of the participants was 45 years, and 56.5% of the subjects were male.  
17  
18 204 Compared to those without MAFLD, subjects with MAFLD were more likely to be  
19  
20 205 male, older, married, smokers, drinkers, tea drinkers, and have a history of diabetes or  
21  
22 206 hypertension (all  $P<0.05$ ). In addition, the subjects in both groups were different in  
23  
24 207 terms of clinical detection indicators (SBP, DBP, TG, FPG, TC, GGT, HDL, BMI, WC,  
25  
26 208 WHR, FLI, and HSI) (all  $P<0.001$ ).  
27  
28  
29

### 30 209 **Association of MAFLD with TyG and its related parameters**

31 210 The associations between MAFLD and TyG and its related parameters were  
32  
33 211 mainly analyzed using the logistic regression model. In the crude model, TyG and its  
34  
35 212 related parameters were positively correlated with MAFLD risk (Table 3). The positive  
36  
37 213 correlations of TyG and its related parameters with MAFLD remained unchanged after  
38  
39 214 adjusting for gender, age, marital status, and educational level in model 1 (each  
40  
41 215  $P<0.001$ ). Model 2 further adjusted for variables such as smoking, drinking, and tea  
42  
43 216 drinking based on model 1. The results remained unchanged (each  $P<0.001$ ). Adding  
44  
45 217 adjustments to some disease history indicators in model 3, the results remained similar.  
46  
47  
48  
49

50 218 The restricted cubic spline analyses were applied to interpret the dose-response  
51  
52 219 relationships of TyG and its related parameters with MAFLD risk (Figure 1). The *ORs*  
53  
54 220 of MAFLD increased with increasing TyG levels. the *ORs* of MAFLD also rose with  
55  
56 221 the increasing TyG-BMI, TyG-WC, and TyG-WHR.  
57  
58  
59  
60

1  
2  
3 222 **Assessment of the accuracy of TyG and its related parameters for the diagnosis of**  
4  
5 223 **MAFLD**

6  
7 224 The ROC curve for the ability of TyG and its related parameters and traditional  
8  
9 225 indicators to predict the risk of MAFLD were shown in Figure 2. And the performance  
10  
11 226 of these models was detailed in Table 4. The AUROCs of TyG and its related  
12  
13 227 parameters were greater than that of traditional indicators, including the HSI. The TyG-  
14  
15 228 WC performed the highest AUROC (0.873, 95%CI: 0.860-0.887,  $P<0.001$ ), compared  
16  
17 229 with TyG-BMI (0.862, 95%CI: 0.847-0.876,  $P<0.001$ ), TyG-WHR (0.836, 95%CI:  
18  
19 230 0.820-0.852,  $P<0.001$ ). Based on the results of NRI, it can be seen that the accuracy of  
20  
21 231 TyG-WC, TyG-BMI and TyG-WHR were improved by 26.4%, 18.7% and 12.5%,  
22  
23 232 respectively, compared with TyG (all  $P<0.001$ ). Moreover, the IDI values of TyG-WC,  
24  
25 233 TyG-BMI, and TyG-WHR were 0.148, 0.125, and 0.071, respectively, which were all  
26  
27 234 greater than 0, indicating that the diagnostic ability of the TyG-related parameters  
28  
29 235 improved compared with the TyG index alone. Specific results are shown in  
30  
31 236 Supplementary Table 1.

32  
33  
34  
35  
36  
37 237 **Discussion**

38  
39 238 In this cross-sectional study, different parameters were tested to predict the  
40  
41 239 presence of MAFLD. The results showed that the TyG index and its associated  
42  
43 240 parameters were independent predictors of MAFLD. Advanced results of ROC curve  
44  
45 241 analysis showed that TyG-BMI, TyG-WC, and TyG-WHR, especially TyG-WC, had  
46  
47 242 better diagnostic values than TyG index alone in diagnosing MAFLD.

48  
49 243 Previous studies have shown that factors such as obesity and metabolic disorders  
50  
51 244 contribute to the onset and progression of MAFLD(29). Simple measures such as BMI,  
52  
53 245 WC, and FLI have been independently correlated with MAFLD(30-32). These findings  
54  
55 246 were validated in the present study. BMI, WC, and FLI were better predictors of  
56  
57  
58  
59  
60

1  
2  
3 247 MAFLD than TC, TG, and FPG. The TyG index is a combination of FPG and TG.  
4  
5 248 Some studies have reported that this index can be used as a surrogate marker for IR and  
6  
7 249 effectively identify MAFLD(21), which is further confirmed by our finding. The  
8  
9 250 present study's analysis revealed that the AUC of TyG index for predicting MAFLD  
10  
11 251 was up to 0.793. It has been well-documented that TyG index is a reliable indicator of  
12  
13 252 IR(33). IR induces an imbalance in glucose metabolism, leading to hyperglycemia,  
14  
15 253 which triggers inflammation and oxidative stress(34). It has been proven that oxidative  
16  
17 254 stress and chronic inflammation are associated with the development of MAFLD(35).  
18  
19 255 In addition, previous studies have shown that IR leads to high intrahepatic triglycerides  
20  
21 256 by stimulating hepatic de novo lipogenesis (DNL) and hepatic gluconeogenesis, among  
22  
23 257 others, activated hepatic gluconeogenesis also increases blood glucose levels(36). High  
24  
25 258 intrahepatic triglycerides and fasting blood glucose are the distinguishing features of  
26  
27 259 diagnostic MAFLD pairs. Therefore, it is logical to use the TyG index as a valid  
28  
29 260 predictor of MAFLD.  
30  
31  
32  
33  
34

35 261 The TyG index-related parameter is a combination parameter of TyG index with  
36  
37 262 WC, BMI, and WHR. It has been shown that TyG index-related parameters are the best  
38  
39 263 predictors of IR compared with visceral obesity indicators and adipokines(37). This is  
40  
41 264 consistent with the results of the present study. Previous studies have shown that FLI  
42  
43 265 and HSI have strong diagnostic abilities for MAFLD(38). In the present study, the area  
44  
45 266 under the ROC curve of TyG-WC index for diagnosing MAFLD was greater than that  
46  
47 267 of FLI and HSI, and it was more effective in diagnosing MAFLD. The ideal  
48  
49 268 noninvasive test should be simple, easy to use, economical, efficient, and convenient  
50  
51 269 for detecting and identifying people at risk for MAFLD. Although the TyG index and  
52  
53 270 its associated parameters do not differ significantly from the diagnostic performance of  
54  
55 271 the FLI. However, TyG index and its related parameters well balance the above  
56  
57  
58  
59  
60

1  
2  
3 272 requirements. Also, among the TyG-related parameters, TyG-WC had a stronger  
4  
5 273 diagnostic performance than TyG-BMI, TyG-WC, and TyG-WHR. The most probable  
6  
7 274 explanation for the appearance of this phenomenon is that hepatic steatosis correlates  
8  
9 275 with body mass index, but correlates more strongly with visceral fat (as measured by  
10  
11 276 WC) because the lipid activity of visceral adipose tissue (VAT) is higher than that of  
12  
13 277 subcutaneous fat, on a per unit weight basis(39). The findings of Khamseh et al. are  
14  
15 278 consistent with ours(40). The AUROC for TyG index, TyG-BMI, and TyG-WC were  
16  
17 279 0.676, 0.675, and 0.693, respectively, which were lower than those derived in the  
18  
19 280 present study. This discrepancy may be attributed to the small number of  
20  
21 281 overweight/obese participants in their study. TyG and its related parameters were found  
22  
23 282 to be effective in diagnosing MAFLD in a cross-sectional study utilizing the NHANES  
24  
25 283 database to include 1727 adults, and the diagnostic value was superior to other  
26  
27 284 predictors of MAFLD(41). 28

28 285 The strengths of this study are the large sample size and the rigorous screening  
29  
30 286 criteria and the application of the most recent standardized diagnostic criteria for  
31  
32 287 defining MAFLD. However, there are some drawbacks to this study. First, this was a  
33  
34 288 cross-sectional study and causality could not be established. Second, self-reported  
35  
36 289 dietary habits and other data are inevitably subject to measurement error. However,  
37  
38 290 because all participants and researchers in this study were blinded to the results of  
39  
40 291 abdominal ultrasonography and blood tests, the absence of differential reporting bias  
41  
42 292 may simply have weakened the associations we observed. Third, although we  
43  
44 293 considered a full set of confounders, as an observational study, the presence of  
45  
46 294 unmeasured confounders is also possible. In addition, our sample was limited to  
47  
48 295 Chinese adults, and it is unclear whether the findings apply to other populations.

## 296 **Conclusions**

1  
2  
3 297 Our study demonstrated that the TyG index is effective in identifying MAFLD,  
4  
5 298 and the TyG-related parameters improved the identification and diagnosis of MAFLD.  
6  
7  
8 299 As an inexpensive and convenient index, TyG and its related parameters, especially  
9  
10 300 TyG-WC may be a useful marker for identifying MAFLD.  
11  
12  
13  
14  
15  
16  
17  
18  
19  
20  
21  
22  
23  
24  
25  
26  
27  
28  
29  
30  
31  
32  
33  
34  
35  
36  
37  
38  
39  
40  
41  
42  
43  
44  
45  
46  
47  
48  
49  
50  
51  
52  
53  
54  
55  
56  
57  
58  
59  
60

For peer review only



1  
2  
3 301 **Acknowledgements**  
4

5 302 We would like to express their gratitude to all participants for their cooperation and to  
6  
7 303 all staffs for recruiting subjects and their technical assistance.  
8  
9

10 304 **Author Contributions**  
11

12 305 PXE designed the study. YR, XWJ, PHW, LLL, and YS collected the data. YR  
13  
14 306 analyzed the data. YR, XWJ, PHW, and LLL contributed to the interpretation of results.  
15  
16 307 YR, XWJ, and PHW drafted the manuscript. PXE, XSH, and HZJ revised the  
17  
18 308 manuscript. All authors have discussed the results and commented on the manuscript.  
19  
20 309 All authors read and approved the final manuscript.  
21  
22

23 310 **Funding**  
24

25 311 This work was supported by the National Natural Science Foundation of China (No.  
26  
27 312 81473047), the Natural Science Foundation of Fujian Province (No. 2019J01316), and  
28  
29 313 the Natural Science Foundation of Fujian Province (No. 2023J01628) .  
30  
31

32 314 **Abbreviations**  
33

34 315 NAFLD: Non-alcoholic fatty liver disease; MAFLD: metabolism-associated fatty liver  
35  
36 316 disease; FLI fatty: liver index; HSI: hepatic steatosis index; BMI: body mass index;  
37  
38 317 ALT: alanine transaminase; AST: aspartate transaminase; IR: insulin resistance;  
39  
40 318 HOMA-IR: Homeostasis model assessment of insulin resistance; TyG: Triglyceride  
41  
42 319 glucose index; TG: triglyceride; TC: total cholesterol; LDL-C: low-density lipoprotein  
43  
44 320 cholesterol; HDL-C: high-density lipoprotein cholesterol; FPG: fasting plasma-glucose;  
45  
46 321 WC: Waist circumference; IQR: interquartile range; RCS: restricted cubic spline; AUC:  
47  
48 322 Area under curve; AUROC: area under receiver operating characteristic; NRI: Net  
49  
50 323 Reclassification Index; IDI: Integrated Discrimination Improvement; UA: uric acid;  
51  
52 324 VAT: visceral adipose tissue  
53  
54  
55  
56  
57

58 325 **Data sharing statement**  
59  
60

1  
2  
3 326 Data are stored in Department of Epidemiology and Health Statistics, Fujian Provincial  
4  
5 327 Key Laboratory of Environment Factors and Cancer, School of Public Health, Fujian  
6  
7  
8 328 Medical University, Fujian, China. Data are available upon request from Xian-E Peng;  
9  
10 329 Email address: [fmuxe@163.com](mailto:fmuxe@163.com).

### 12 330 **Ethics approval and consent to participate**

14 331 The current study was carried out in compliance with the Declaration of Helsinki, and  
15  
16 332 the Ethics Committee of Fujian Medical University approved the study protocol (ethics  
17  
18 333 number 2014096). All subjects provided their informed consent prior to participating  
19  
20  
21 334 in this study.

### 24 335 **Competing interests**

26 336 The authors declare that they have no competing interests.

### 28 337 **Consent for publication**

30 338 Not applicable.

## 339 **References**

- 340 1. Eslam M, Valenti L, Romeo S. Genetics and epigenetics of NAFLD and NASH: Clinical  
341 impact. *J Hepatol.* 2018;68(2):268-79.
- 342 2. Papatheodoridi M, Cholongitas E. Diagnosis of Non-alcoholic Fatty Liver Disease (NAFLD):  
343 Current Concepts. *Curr Pharm Des.* 2018;24(38):4574-86.
- 344 3. Eslam M, Newsome PN, Sarin SK, Anstee QM, Targher G, Romero-Gomez M, et al. A  
345 new definition for metabolic dysfunction-associated fatty liver disease: An international expert  
346 consensus statement. *J Hepatol.* 2020;73(1):202-9.
- 347 4. Liao X, Ma Q, Wu T, Shao C, Lin Y, Sun Y, et al. Lipid-Lowering Responses to  
348 Dyslipidemia Determine the Efficacy on Liver Enzymes in Metabolic Dysfunction-Associated  
349 Fatty Liver Disease with Hepatic Injuries: A Prospective Cohort Study. *Diabetes Metab Syndr*  
350 *Obes.* 2022;15:1173-84.
- 351 5. Su W, Chen M, Xiao L, Du S, Xue L, Feng R, et al. Association of metabolic dysfunction-  
352 associated fatty liver disease, type 2 diabetes mellitus, and metabolic goal achievement with  
353 risk of chronic kidney disease. *Front Public Health.* 2022;10:1047794.
- 354 6. Wang X, Liu X, He P, Guan K, Yang Y, Lei Y, et al. The Imbalance of Mitochondrial  
355 Homeostasis of Peripheral Blood-Derived Macrophages Mediated by MAFLD May Impair the  
356 Walking Ability of Elderly Patients with Osteopenia. *Oxid Med Cell Longev.* 2022;2022:5210870.
- 357 7. Foghsgaard S, Andreasen C, Vedtofte L, Andersen ES, Bahne E, Strandberg C, et al.  
358 Nonalcoholic Fatty Liver Disease Is Prevalent in Women With Prior Gestational Diabetes  
359 Mellitus and Independently Associated With Insulin Resistance and Waist Circumference.  
360 *Diabetes Care.* 2017;40(1):109-16.

- 1  
2  
3  
4 361 8. Sasso M, Miette V, Sandrin L, Beaugrand M. The controlled attenuation parameter (CAP):  
5  
6 362 a novel tool for the non-invasive evaluation of steatosis using Fibroscan. Clin Res Hepatol  
7  
8  
9 363 Gastroenterol. 2012;36(1):13-20.  
10  
11 364 9. Rinella ME, Sanyal AJ. Management of NAFLD: a stage-based approach. Nat Rev  
12  
13 365 Gastroenterol Hepatol. 2016;13(4):196-205.  
14  
15  
16 366 10. El-Agroudy NN, Kurzbach A, Rodionov RN, O'Sullivan J, Roden M, Birkenfeld AL, et al.  
17  
18 367 Are Lifestyle Therapies Effective for NAFLD Treatment? Trends Endocrinol Metab.  
19  
20 368 2019;30(10):701-9.  
21  
22  
23 369 11. Yong HY, Larrouy-Maumus G, Zloh M, Smyth R, Ataya R, Benton CM, et al. Early detection  
24  
25 370 of metabolic changes in drug-induced steatosis using metabolomics approaches. RSC Adv.  
26  
27 371 2020;10(67):41047-57.  
28  
29  
30 372 12. Castera L, Friedrich-Rust M, Loomba R. Noninvasive Assessment of Liver Disease in  
31  
32 373 Patients With Nonalcoholic Fatty Liver Disease. Gastroenterology. 2019;156(5):1264-81.e4.  
33  
34  
35 374 13. Zhou JH, Cai JJ, She ZG, Li HL. Noninvasive evaluation of nonalcoholic fatty liver disease:  
36  
37 375 Current evidence and practice. World J Gastroenterol. 2019;25(11):1307-26.  
38  
39  
40 376 14. Wang J, Qi Y, Xin Z, Huo Y, Wan Q, Qin Y, et al. Isotemporal substitution of different  
41  
42 377 behaviour patterns with the presence of MAFLD in Chinese adults. Liver Int. 2022;42(12):2683-  
43  
44 378 95.  
45  
46  
47 379 15. Li H, Zhang Y, Luo H, Lin R. The lipid accumulation product is a powerful tool to diagnose  
48  
49 380 metabolic dysfunction-associated fatty liver disease in the United States adults. Front  
50  
51 381 Endocrinol (Lausanne). 2022;13:977625.  
52  
53  
54 382 16. Pan X, Xie X, Peng H, Cai X, Li H, Hong Q, et al. Risk Prediction for Non-alcoholic Fatty  
55  
56  
57  
58  
59  
60

- 1  
2  
3  
4 383 Liver Disease Based on Biochemical and Dietary Variables in a Chinese Han Population. *Front*  
5  
6 384 *Public Health*. 2020;8:220.  
7  
8  
9 385 17. Ding YS, Guo SX, Ma RL, Li SG, Guo H, Zhang JY, et al. Association of Metabolic  
10  
11 386 Syndrome with the Adiponectin to Homeostasis Model Assessment of Insulin Resistance Ratio.  
12  
13 387 *Mediators Inflamm*. 2015;2015:607364.  
14  
15  
16  
17 388 18. Han M, Wang H, Yang S, Zhu S, Zhao G, Shi H, et al. Triglyceride glucose index and  
18  
19 389 Atherogenic index of plasma for predicting colorectal neoplasms in patients without  
20  
21 390 cardiovascular diseases. *Front Oncol*. 2022;12:1031259.  
22  
23  
24  
25 391 19. Luo E, Wang D, Yan G, Qiao Y, Liu B, Hou J, et al. High triglyceride-glucose index is  
26  
27 392 associated with poor prognosis in patients with acute ST-elevation myocardial infarction after  
28  
29 393 percutaneous coronary intervention. *Cardiovasc Diabetol*. 2019;18(1):150.  
30  
31  
32 394 20. Alizargar J, Bai CH, Hsieh NC, Wu SV. Use of the triglyceride-glucose index (TyG) in  
33  
34 395 cardiovascular disease patients. *Cardiovasc Diabetol*. 2020;19(1):8.  
35  
36  
37  
38 396 21. Zhang R, Guan Q, Zhang M, Ding Y, Tang Z, Wang H, et al. Association Between  
39  
40 397 Triglyceride-Glucose Index and Risk of Metabolic Dysfunction-Associated Fatty Liver Disease:  
41  
42 398 A Cohort Study. *Diabetes Metab Syndr Obes*. 2022;15:3167-79.  
43  
44  
45  
46 399 22. Wang J, Yan S, Cui Y, Chen F, Piao M, Cui W. The Diagnostic and Prognostic Value of  
47  
48 400 the Triglyceride-Glucose Index in Metabolic Dysfunction-Associated Fatty Liver Disease  
49  
50 401 (MAFLD): A Systematic Review and Meta-Analysis. *Nutrients*. 2022;14(23).  
51  
52  
53  
54 402 23. Peng H, Pan L, Ran S, Wang M, Huang S, Zhao M, et al. Prediction of MAFLD and NAFLD  
55  
56 403 using different screening indexes: A cross-sectional study in U.S. adults. *Front Endocrinol*  
57  
58 404 (Lausanne). 2023;14:1083032.  
59  
60

- 1  
2  
3  
4 405 24. Peng H, Xie X, Pan X, Zheng J, Zeng Y, Cai X, et al. Association of meat consumption  
5  
6 406 with NAFLD risk and liver-related biochemical indexes in older Chinese: a cross-sectional study.  
7  
8  
9 407 BMC Gastroenterol. 2021;21(1):221.  
10  
11 408 25. Xiane Peng ZH, Jianyin Lin, Qingqing Lu, Jun Lin, Xu Lin. Analysis of the prevalence and  
12  
13 409 influencing factors of non-alcoholic fatty liver disease in staff. China Public Health.  
14  
15 410 2009;25(10):1235-7.  
16  
17 411 26. Er LK, Wu S, Chou HH, Hsu LA, Teng MS, Sun YC, et al. Triglyceride Glucose-Body Mass  
18  
19 412 Index Is a Simple and Clinically Useful Surrogate Marker for Insulin Resistance in Nondiabetic  
20  
21 413 Individuals. PLoS One. 2016;11(3):e0149731.  
22  
23 414 27. Koh SM, Chung SH, Yum YJ, Park SJ, Joo HJ, Kim YH, et al. Comparison of the effects  
24  
25 415 of triglyceride variability and exposure estimate on clinical prognosis in diabetic patients.  
26  
27 416 Cardiovasc Diabetol. 2022;21(1):245.  
28  
29 417 28. Mei YX, Zhang ZX, Wu H, Hou J, Liu XT, Sang SX, et al. Health-Related Quality of Life  
30  
31 418 and Its Related Factors in Survivors of Stroke in Rural China: A Large-Scale Cross-Sectional  
32  
33 419 Study. Front Public Health. 2022;10:810185.  
34  
35 420 29. Ijuin S, Oda K, Mawatari S, Taniyama O, Toyodome A, Sakae H, et al. Serine  
36  
37 421 palmitoyltransferase long chain subunit 3 is associated with hepatocellular carcinoma in  
38  
39 422 patients with NAFLD. Mol Clin Oncol. 2022;16(2):55.  
40  
41 423 30. Li H, Guo M, An Z, Meng J, Jiang J, Song J, et al. Prevalence and Risk Factors of Metabolic  
42  
43 424 Associated Fatty Liver Disease in Xinxiang, China. Int J Environ Res Public Health. 2020;17(6).  
44  
45 425 31. Wang H, Zhang Y, Liu Y, Li H, Xu R, Fu H, et al. Comparison between traditional and new  
46  
47 426 obesity measurement index for screening metabolic associated fatty liver disease. Front  
48  
49  
50  
51  
52  
53  
54  
55  
56  
57  
58  
59  
60

- 1  
2  
3  
4 427 Endocrinol (Lausanne). 2023;14:1163682.  
5  
6 428 32. Qu J, Dou J, Wang A, Liu Y, Lin L, Chen K, et al. Fatty liver index for hyperuricemia  
7  
8 429 diagnosis: a community-based cohort study. BMC Endocr Disord. 2022;22(1):114.  
9  
10  
11 430 33. Li T, Yang C, Yang J, Jing J, Ma C. Elevated triglyceride-glucose index predicts mortality  
12  
13 431 following endovascular abdominal aortic aneurysm repair. Front Nutr. 2023;10:1116425.  
14  
15  
16 432 34. Tao LC, Xu JN, Wang TT, Hua F, Li JJ. Triglyceride-glucose index as a marker in  
17  
18 433 cardiovascular diseases: landscape and limitations. Cardiovasc Diabetol. 2022;21(1):68.  
19  
20  
21 434 35. Xing Y, Chen J, Liu J, Ma H. Associations Between GGT/HDL and MAFLD: A Cross-  
22  
23 435 Sectional Study. Diabetes Metab Syndr Obes. 2022;15:383-94.  
24  
25  
26 436 36. van Son KC, Verschuren L, Hanemaaijer R, Reeves H, Takkenberg RB, Drenth JPH, et  
27  
28 437 al. Non-Parenchymal Cells and the Extracellular Matrix in Hepatocellular Carcinoma in Non-  
29  
30 438 Alcoholic Fatty Liver Disease. Cancers (Basel). 2023;15(4).  
31  
32  
33 439 37. Sheng G, Lu S, Xie Q, Peng N, Kuang M, Zou Y. The usefulness of obesity and lipid-  
34  
35 440 related indices to predict the presence of Non-alcoholic fatty liver disease. Lipids Health Dis.  
36  
37 441 2021;20(1):134.  
38  
39  
40 442 38. Okada A, Yamada G, Kimura T, Hagiwara Y, Yamaguchi S, Kurakawa KI, et al. Diagnostic  
41  
42 443 ability using fatty liver and metabolic markers for metabolic-associated fatty liver disease  
43  
44 444 stratified by metabolic/glycemic abnormalities. J Diabetes Investig. 2023;14(3):463-78.  
45  
46  
47 445 39. Gruzdeva O, Borodkina D, Uchasova E, Dyleva Y, Barbarash O. Localization of fat depots  
48  
49 446 and cardiovascular risk. Lipids Health Dis. 2018;17(1):218.  
50  
51  
52 447 40. Khamseh ME, Malek M, Abbasi R, Taheri H, Lahouti M, Alaei-Shahmiri F. Triglyceride  
53  
54 448 Glucose Index and Related Parameters (Triglyceride Glucose-Body Mass Index and  
55  
56  
57  
58  
59  
60

- 1  
2  
3  
4 449 Triglyceride Glucose-Waist Circumference) Identify Nonalcoholic Fatty Liver and Liver Fibrosis  
5  
6  
7 450 in Individuals with Overweight/Obesity. *Metab Syndr Relat Disord*. 2021;19(3):167-73.  
8  
9 451 41. Xue Y, Xu J, Li M, Gao Y. Potential screening indicators for early diagnosis of  
10  
11 452 NAFLD/MAFLD and liver fibrosis: Triglyceride glucose index-related parameters. *Front*  
12  
13  
14 453 *Endocrinol (Lausanne)*. 2022;13:951689.  
15  
16 454

For peer review only



1  
2  
3 455 **Figure legends**  
4

5 456 **Figure 1** Restrictive cubic spline modeling of the association between NAFLD and  
6  
7  
8 457 TyG and its related parameters. Red area, 95% confidence interval. Each model was  
9  
10 458 adjusted for gender, age, marital status, educational level, smoking, drinking, tea  
11  
12 459 drinking, history of diabetes, and history of hypertension  
13

14 460 **Figure 2** ROC curves of TyG and its related parameters and biochemical indexes  
15  
16  
17  
18  
19  
20  
21  
22  
23  
24  
25  
26  
27  
28  
29  
30  
31  
32  
33  
34  
35  
36  
37  
38  
39  
40  
41  
42  
43  
44  
45  
46  
47  
48  
49  
50  
51  
52  
53  
54  
55  
56  
57  
58  
59  
60

For peer review only

**Table 1 Comparison of general characteristics**

| Variables                 | Overall<br>(n=2605) | With MAFLD<br>(n=726) | Without MAFLD<br>(n=1879) | P-value* |
|---------------------------|---------------------|-----------------------|---------------------------|----------|
| Age(years), M (IQR)       | 45 (33, 52)         | 43 (31, 51)           | 48 (38, 54)               | <0.001   |
| Gender, n (%)             |                     |                       |                           | <0.001   |
| Males                     | 1471 (56.5)         | 584 (80.4)            | 887 (47.2)                |          |
| Females                   | 1134 (43.5)         | 142 (19.6)            | 992 (52.8)                |          |
| Marital Status, n (%)     |                     |                       |                           | <0.001   |
| Single                    | 378 (14.5)          | 68 (9.4)              | 310 (16.5)                |          |
| Married                   | 2209 (84.8)         | 652 (89.8)            | 1557 (82.9)               |          |
| Divorced                  | 9 (0.4)             | 2 (0.3)               | 7 (0.4)                   |          |
| Widowed                   | 9 (0.4)             | 4 (0.6)               | 5 (0.3)                   |          |
| Educational level, n (%)  |                     |                       |                           | 0.032    |
| Bachelor degree or above  | 913 (35.1)          | 228 (31.4)            | 685 (36.5)                |          |
| Junior college            | 603 (23.2)          | 172 (23.7)            | 431 (22.9)                |          |
| Senior high school        | 593 (22.8)          | 189 (26.0)            | 404 (21.5)                |          |
| Junior high school        | 319 (12.3)          | 87 (12.0)             | 232 (12.3)                |          |
| Primary school            | 140 (5.4)           | 35 (4.8)              | 105 (5.6)                 |          |
| Illiteracy                | 37 (1.4)            | 15 (2.1)              | 22 (1.2)                  |          |
| Income(yuan/month), n (%) |                     |                       |                           | 0.066    |
| <2000                     | 147 (5.6)           | 35 (4.8)              | 112 (6.0)                 |          |
| 2000~3000                 | 794 (30.5)          | 202 (27.8)            | 592 (31.5)                |          |
| ≥3000                     | 1664 (63.9)         | 489 (67.4)            | 1175 (62.5)               |          |
| Smoking status, n (%)     |                     |                       |                           | <0.001   |
| Never                     | 1916 (73.6)         | 448 (61.7)            | 1468 (78.1)               |          |
| Former                    | 113 (4.3)           | 45 (6.2)              | 68 (3.6)                  |          |
| Current                   | 576 (22.1)          | 233 (32.1)            | 343 (18.3)                |          |
| Drinking status, n (%)    |                     |                       |                           | <0.001   |

|    |                                |             |            |             |        |
|----|--------------------------------|-------------|------------|-------------|--------|
| 1  |                                |             |            |             |        |
| 2  |                                |             |            |             |        |
| 3  |                                |             |            |             |        |
| 4  |                                |             |            |             |        |
| 5  | Never                          | 1624 (62.3) | 389 (53.6) | 1235 (65.7) |        |
| 6  | Former                         | 42 (1.6)    | 15 (2.1)   | 27 (1.4)    |        |
| 7  | Current                        | 939 (36.1)  | 322 (44.4) | 617 (32.8)  |        |
| 8  | Tea drinking status, n (%)     |             |            |             | <0.001 |
| 9  | Never                          | 1052 (40.4) | 205 (28.2) | 847 (45.1)  |        |
| 10 | Former                         | 8 (0.3)     | 3 (0.4)    | 5 (0.3)     |        |
| 11 | Current                        | 1545 (59.3) | 518 (71.3) | 1027 (54.7) |        |
| 12 | History of diabetes, n (%)     |             |            |             | <0.001 |
| 13 | No                             | 2459 (94.4) | 650 (89.5) | 1809 (96.3) |        |
| 14 | Yes                            | 146 (5.6)   | 76 (10.5)  | 70 (3.7)    |        |
| 15 | History of hypertension, n (%) |             |            |             | <0.001 |
| 16 | No                             | 1666 (64.0) | 294 (40.5) | 1372 (73.0) |        |
| 17 | Yes                            | 939 (36.1)  | 432 (59.5) | 507 (27.0)  |        |

Data are presented as median with the interquartile range [M (P25, P75)]. \* Comparison of the differences between the groups calculated by Mann-Whitney U test or chi-square test.

**Table 2 Evaluation of biochemical indices**

| Variables                       | Overall<br>(n=2605)  | With MAFLD<br>(n=726) | Without MAFLD<br>(n=1879) | P-value* |
|---------------------------------|----------------------|-----------------------|---------------------------|----------|
| BMI(kg/m <sup>2</sup> ), M(IQR) | 22.9 (20.8, 25.1)    | 25.4 (23.9, 27.0)     | 22.0 (20.3, 23.8)         | <0.001   |
| SBP (mmHg), M(IQR)              | 118 (110, 128)       | 125 (118, 136)        | 115 (107, 123)            | <0.001   |
| DBP (mmHg), M(IQR)              | 80 (72, 86)          | 85 (80, 90)           | 78 (70, 82)               | <0.001   |
| TG(mg/dL), M (IQR)              | 109.7 (79.7, 163.8)  | 169.0 (118.6, 243.4)  | 94.7 (73.5, 131.9)        | <0.001   |
| FPG(mg/dL), M (IQR)             | 93.1 (88.4, 99.7)    | 96.7 (91.1, 106.4)    | 92.2 (87.7, 97.2)         | <0.001   |
| TC(mmol/L), M (IQR)             | 5.0 (4.5, 5.6)       | 5.2 (4.7, 5.9)        | 5.0 (4.4, 5.5)            | 0.007    |
| GGT(U/L), M (IQR)               | 23 (16, 36)          | 34 (24, 52)           | 20 (15, 29)               | <0.001   |
| HDL(mmol/L), M (IQR)            | 1.3 (1.1, 1.5)       | 1.2 (1.0, 1.3)        | 1.4 (1.2, 1.5)            | <0.001   |
| WC(cm), M(IQR)                  | 82 (75, 89)          | 90 (85, 95)           | 78 (70, 85)               | <0.001   |
| WHR, M (IQR)                    | 0.9 (0.8, 0.9)       | 0.9 (0.9, 0.9)        | 0.84 (0.8, 0.9)           | <0.001   |
| FLI, M (IQR)                    | 0.3 (0.1, 1.1)       | 1.4 (0.6, 3.4)        | 0.2 (0.1, 0.5)            | <0.001   |
| HSI, M (IQR)                    | 31.6 (28.5, 34.8)    | 35.5 (32.9, 38.6)     | 30.2 (27.7, 32.9)         | <0.001   |
| TyG, M (IQR)                    | 8.6 (8.2, 9.0)       | 9.0 (8.7, 9.4)        | 8.4 (8.1, 8.7)            | <0.001   |
| TyG-WC, M (IQR)                 | 703.1 (623.9, 790.6) | 814.6 (759.2, 875.4)  | 660.9 (600.3, 730.5)      | <0.001   |
| TyG-BMI, M (IQR)                | 197.0 (174.2, 222.6) | 228.8 (211.0, 248.9)  | 184.3 (167.4, 205.1)      | <0.001   |
| TyG-WHR, M (IQR)                | 7.4 (6.7, 8.1)       | 8.2 (7.7, 8.7)        | 7.1 (6.5, 7.7)            | <0.001   |

Data are presented as median with the interquartile range [M (P25, P75)]. \* Comparison of the differences between the groups calculated by Mann-Whitney U test. BMI, body mass index; SBP, systolic blood pressure; DBP, diastolic blood pressure; TG, serum triglyceride; FPG,

1  
2  
3  
4  
5 fasting plasma glucose; TC, total cholesterol; GGT, Gamma-glutamyltransferase; HDL, high-density lipoprotein; WC, waist  
6 circumference; WHR, waist-to-hip ratio; FLI, fatty liver index; HIS, hepatic steatosis index; TyG, triglyceride-glucose; TyG-WC,  
7 triglyceride-glucose-waist circumference; TyG-BMI, triglyceride-glucose-body mass index; TyG-WHR, triglyceride-glucose- waist-to-  
8 hip ratio.  
9  
10  
11  
12  
13  
14  
15  
16  
17  
18  
19  
20  
21  
22  
23  
24  
25  
26  
27  
28  
29  
30  
31  
32  
33  
34  
35  
36  
37  
38  
39  
40  
41  
42  
43  
44  
45  
46

For peer review only

**Table 3** Univariate and multivariate logistic analysis of TyG and related parameters and MAFLD

| Variables | Crude model                |                 | Model 1 <sup>a</sup>       |                 | Model 2 <sup>b</sup>       |                 | Model 3 <sup>c</sup>       |                 |
|-----------|----------------------------|-----------------|----------------------------|-----------------|----------------------------|-----------------|----------------------------|-----------------|
|           | <i>OR</i> (95% <i>CI</i> ) | <i>P</i> -value |
| TyG       | 6.33 (5.27, 7.60)          | <0.001          | 4.96 (4.09, 6.01)          | <0.001          | 5.15 (4.23, 6.27)          | <0.001          | 4.89 (3.98, 6.00)          | <0.001          |
| TyG-WC    | 1.02 (1.01, 1.02)          | <0.001          | 1.01 (1.01, 1.02)          | <0.001          | 1.02 (1.01, 1.02)          | <0.001          | 1.01 (1.01, 1.02)          | <0.001          |
| TyG-BMI   | 1.05 (1.05, 1.05)          | <0.001          | 1.05 (1.04, 1.05)          | <0.001          | 1.05 (1.04, 1.05)          | <0.001          | 1.05 (1.04, 1.05)          | <0.001          |
| TyG-WHR   | 4.44 (3.89, 5.08)          | <0.001          | 4.18 (3.60, 4.87)          | <0.001          | 4.32 (3.70, 5.04)          | <0.001          | 4.08 (3.48, 4.78)          | <0.001          |

<sup>a</sup>: Adjusted for gender, age, marital status, and educational level;

<sup>b</sup>: Adjusted for gender, age, marital status, educational level, smoking, drinking, and tea drinking;

<sup>c</sup>: Adjusted for gender, age, marital status, educational level, smoking, drinking, tea drinking, history of diabetes, and history of hypertension.

TyG, triglyceride-glucose; TyG-WC, triglyceride-glucose-waist circumference; TyG-BMI, triglyceride-glucose-body mass index; TyG-WHR, triglyceride-glucose- waist-to-hip ratio.

**Table 4** Area under curve (AUC) analysis

| Variables               | AUC (95%CI)          | AIC    | Sensitivity% | Specificity% | optimal cut-off | P -value |
|-------------------------|----------------------|--------|--------------|--------------|-----------------|----------|
| TC(mmol/L)              | 0.588 (0.564, 0.613) | 3206.9 | 58.3%        | 58.6%        | 5.045           | <0.001   |
| GGT(U/L)                | 0.761 (0.742, 0.781) | 2982.7 | 74.8%        | 65.6%        | 24.500          | <0.001   |
| HDL(mmol/L)             | 0.711 (0.689, 0.732) | 3214.3 | 69.1%        | 63.4%        | 1.285           | 1.000    |
| TG(mg/dL)               | 0.784 (0.764, 0.803) | 3057.6 | 68.2%        | 78.0%        | 137.618         | <0.001   |
| FPG(mg/dL)              | 0.653 (0.629, 0.677) | 3085.7 | 55.1%        | 69.7%        | 95.67           | <0.001   |
| WC(cm)                  | 0.846 (0.830, 0.861) | 2378.3 | 80.2%        | 74.9%        | 84.500          | <0.001   |
| BMI(kg/m <sup>2</sup> ) | 0.822 (0.804, 0.839) | 2486.4 | 78.9%        | 72.5%        | 23.525          | <0.001   |
| FLI                     | 0.872 (0.859, 0.886) | 2809.1 | 87.5%        | 72.1%        | 0.419           | <0.001   |
| HSI                     | 0.821 (0.803, 0.838) | 2554.0 | 77.1%        | 73.3%        | 32.715          | <0.001   |
| TyG                     | 0.793 (0.774, 0.812) | 2676.8 | 72.2%        | 75.0%        | 8.738           | <0.001   |
| TyG-WC                  | 0.873 (0.860, 0.887) | 2199.6 | 88.7%        | 71.4%        | 716.743         | <0.001   |
| TyG-BMI                 | 0.862 (0.847, 0.876) | 2239.1 | 85.3%        | 73.3%        | 203.154         | <0.001   |
| TyG-WHR                 | 0.836 (0.820, 0.852) | 2448.0 | 84.6%        | 67.7%        | 7.444           | <0.001   |

AIC, Akaike information criterion; TC, total cholesterol; GGT, Gamma-glutamyltransferase; HDL, high-density lipoprotein; TG, serum triglyceride; FPG, fasting plasma glucose; WC, waist circumference; BMI, body mass index; FLI, fatty liver index; HIS, hepatic steatosis index; TyG, triglyceride-glucose; TyG-WC, triglyceride-glucose-waist circumference; TyG-BMI, triglyceride-glucose-body mass index; TyG-WHR, triglyceride-glucose- waist-to-hip ratio.

1  
2  
3  
4  
5  
6  
7  
8  
9  
10  
11  
12  
13  
14  
15  
16  
17  
18  
19  
20  
21  
22  
23  
24  
25  
26  
27  
28  
29  
30  
31  
32  
33  
34  
35  
36  
37  
38  
39  
40  
41  
42  
43  
44  
45  
46

For peer review only



1  
2  
3  
4  
5  
6  
7  
8  
9  
10  
11  
12  
13  
14  
15  
16  
17  
18  
19  
20  
21  
22  
23  
24  
25  
26  
27  
28  
29  
30  
31  
32  
33  
34  
35  
36  
37  
38  
39  
40  
41  
42  
43  
44  
45  
46  
47  
48  
49  
50  
51  
52  
53  
54  
55  
56  
57  
58  
59  
60

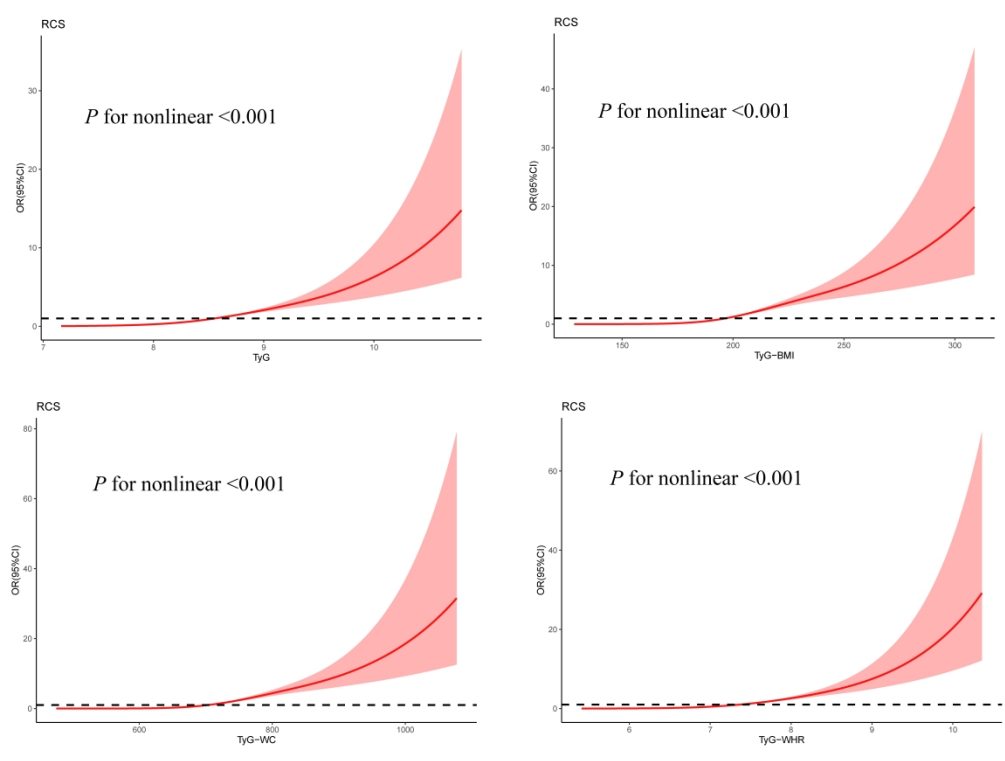

Figure 1 Restrictive cubic spline modeling of the association between NAFLD and TyG and its related parameters. Red area, 95% confidence interval. Each model was adjusted for gender, age, marital status, educational level, smoking, drinking, tea drinking, history of diabetes, and history of hypertension

400x294mm (300 x 300 DPI)

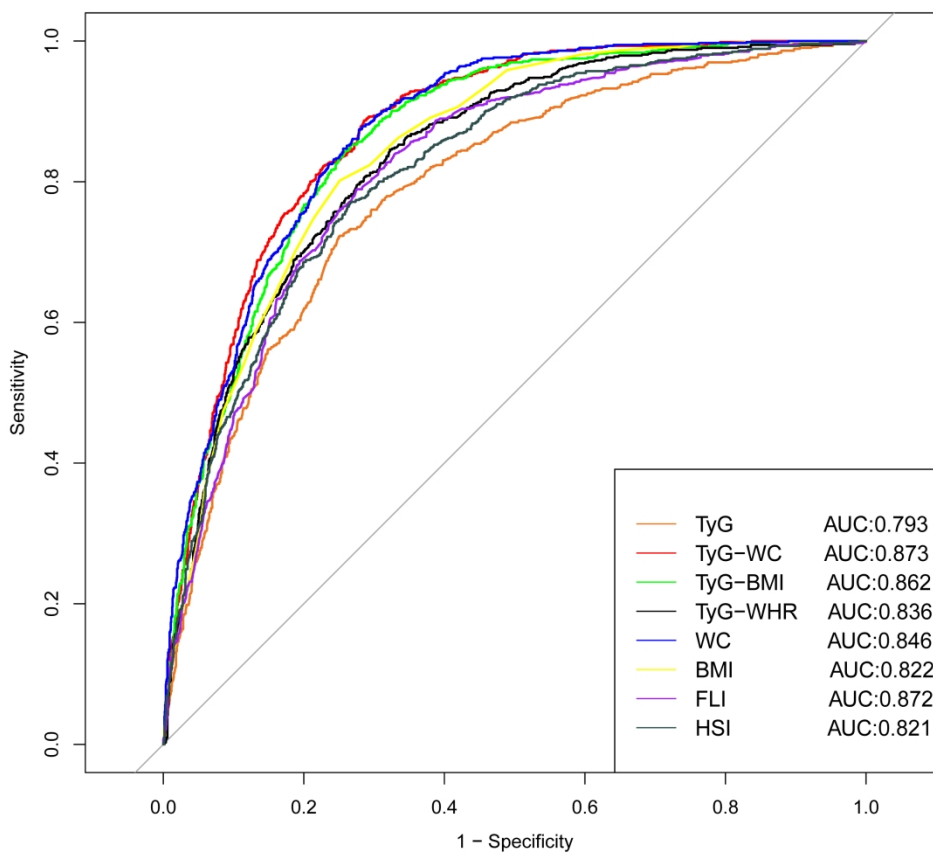

ROC curves of TyG and its related parameters and biochemical indexes

223x200mm (300 x 300 DPI)

Supplement Table 1 NRI and IDI analyses

| Variables               | NRI (95% CI)            | P-value | IDI (95% CI)            | P-value |
|-------------------------|-------------------------|---------|-------------------------|---------|
| TyG                     | Reference               | <0.001  | Reference               | <0.001  |
| TC(mmol/L)              | -0.437 (-0.479, -0.395) | <0.001  | -0.199 (-0.216, -0.182) | <0.001  |
| GGT(mmol/L)             | -0.249 (-0.298, -0.195) | <0.001  | -0.110 (-0.127, -0.092) | <0.001  |
| HDL(mmol/L)             | -0.169 (-0.214, -0.121) | <0.001  | -0.119 (-0.136, -0.101) | <0.001  |
| TG(mg/dL)               | -0.200 (-0.231, -0.169) | <0.001  | -0.053 (-0.059, -0.046) | <0.001  |
| FPG(mg/dL)              | -0.661 (-0.695, -0.626) | <0.001  | -0.208 (-0.226, -0.191) | <0.001  |
| WC(cm)                  | 0.150 (0.097, 0.202)    | <0.001  | 0.091 (0.067, 0.115)    | <0.001  |
| BMI(kg/m <sup>2</sup> ) | 0.113 (0.061, 0.167)    | <0.001  | 0.051 (0.027, 0.076)    | <0.001  |
| FLI                     | 0.112 (0.060, 0.165)    | <0.001  | 0.033 (0.015, 0.051)    | <0.001  |
| HSI                     | 0.059 (-0.005, 0.123)   | 0.068   | 0.048 (0.024, 0.072)    | <0.001  |
| TyG-WC                  | 0.264 (0.212, 0.316)    | <0.001  | 0.148 (0.129, 0.160)    | <0.001  |
| TyG-BMI                 | 0.187 (0.122, 0.258)    | <0.001  | 0.125 (0.107, 0.143)    | <0.001  |
| TyG-WHR                 | 0.125 (0.087, 0.167)    | <0.001  | 0.071 (0.059, 0.083)    | <0.001  |

TyG, triglyceride-glucose; TC, total cholesterol; GGT, Gamma-glutamyltransferase; HDL, high-density lipoprotein; TG, serum triglyceride; FPG, fasting plasma glucose; WC, waist circumference; BMI, body mass index; FLI, fatty liver index; HIS, hepatic steatosis index; TyG-WC, triglyceride-glucose-waist circumference; TyG-BMI, triglyceride-glucose-body mass index; TyG-WHR, triglyceride-glucose- waist-to-hip ratio.

STROBE Statement—Checklist of items that should be included in reports of *cross-sectional studies*

|                              | Item No | Recommendation                                                                                                                                                                                               | Page No |
|------------------------------|---------|--------------------------------------------------------------------------------------------------------------------------------------------------------------------------------------------------------------|---------|
| <b>Title and abstract</b>    | 1       | (a) Indicate the study's design with a commonly used term in the title or the abstract                                                                                                                       | 1       |
|                              |         | (b) Provide in the abstract an informative and balanced summary of what was done and what was found                                                                                                          | 1       |
| <b>Introduction</b>          |         |                                                                                                                                                                                                              |         |
| Background/rationale         | 2       | Explain the scientific background and rationale for the investigation being reported                                                                                                                         | 3       |
| Objectives                   | 3       | State specific objectives, including any prespecified hypotheses                                                                                                                                             | 5       |
| <b>Methods</b>               |         |                                                                                                                                                                                                              |         |
| Study design                 | 4       | Present key elements of study design early in the paper                                                                                                                                                      | 5       |
| Setting                      | 5       | Describe the setting, locations, and relevant dates, including periods of recruitment, exposure, follow-up, and data collection                                                                              | 5       |
| Participants                 | 6       | (a) Give the eligibility criteria, and the sources and methods of selection of participants                                                                                                                  | 5       |
| Variables                    | 7       | Clearly define all outcomes, exposures, predictors, potential confounders, and effect modifiers. Give diagnostic criteria, if applicable                                                                     | 6       |
| Data sources/<br>measurement | 8*      | For each variable of interest, give sources of data and details of methods of assessment (measurement). Describe comparability of assessment methods if there is more than one group                         | 6       |
| Bias                         | 9       | Describe any efforts to address potential sources of bias                                                                                                                                                    | 11      |
| Study size                   | 10      | Explain how the study size was arrived at                                                                                                                                                                    | 5       |
| Quantitative variables       | 11      | Explain how quantitative variables were handled in the analyses. If applicable, describe which groupings were chosen and why                                                                                 | 6       |
| Statistical methods          | 12      | (a) Describe all statistical methods, including those used to control for confounding                                                                                                                        | 77      |
|                              |         | (b) Describe any methods used to examine subgroups and interactions                                                                                                                                          | 7       |
|                              |         | (c) Explain how missing data were addressed                                                                                                                                                                  | 7       |
|                              |         | (d) If applicable, describe analytical methods taking account of sampling strategy                                                                                                                           | 7       |
|                              |         | (e) Describe any sensitivity analyses                                                                                                                                                                        | 7       |
| <b>Results</b>               |         |                                                                                                                                                                                                              |         |
| Participants                 | 13*     | (a) Report numbers of individuals at each stage of study—eg numbers potentially eligible, examined for eligibility, confirmed eligible, included in the study, completing follow-up, and analysed            | 8       |
|                              |         | (b) Give reasons for non-participation at each stage                                                                                                                                                         | 8       |
|                              |         | (c) Consider use of a flow diagram                                                                                                                                                                           | 8       |
| Descriptive data             | 14*     | (a) Give characteristics of study participants (eg demographic, clinical, social) and information on exposures and potential confounders                                                                     | 8       |
|                              |         | (b) Indicate number of participants with missing data for each variable of interest                                                                                                                          | 8       |
| Outcome data                 | 15*     | Report numbers of outcome events or summary measures                                                                                                                                                         | 8       |
| Main results                 | 16      | (a) Give unadjusted estimates and, if applicable, confounder-adjusted estimates and their precision (eg, 95% confidence interval). Make clear which confounders were adjusted for and why they were included | 8       |

|                          |    |                                                                                                                                                                            |    |
|--------------------------|----|----------------------------------------------------------------------------------------------------------------------------------------------------------------------------|----|
|                          |    | (b) Report category boundaries when continuous variables were categorized                                                                                                  | 8  |
|                          |    | (c) If relevant, consider translating estimates of relative risk into absolute risk for a meaningful time period                                                           | 8  |
| Other analyses           | 17 | Report other analyses done—eg analyses of subgroups and interactions, and sensitivity analyses                                                                             | 8  |
| <b>Discussion</b>        |    |                                                                                                                                                                            |    |
| Key results              | 18 | Summarise key results with reference to study objectives                                                                                                                   | 9  |
| Limitations              | 19 | Discuss limitations of the study, taking into account sources of potential bias or imprecision. Discuss both direction and magnitude of any potential bias                 | 11 |
| Interpretation           | 20 | Give a cautious overall interpretation of results considering objectives, limitations, multiplicity of analyses, results from similar studies, and other relevant evidence | 10 |
| Generalisability         | 21 | Discuss the generalisability (external validity) of the study results                                                                                                      | 9  |
| <b>Other information</b> |    |                                                                                                                                                                            |    |
| Funding                  | 22 | Give the source of funding and the role of the funders for the present study and, if applicable, for the original study on which the present article is based              | 12 |

\*Give information separately for exposed and unexposed groups.

**Note:** An Explanation and Elaboration article discusses each checklist item and gives methodological background and published examples of transparent reporting. The STROBE checklist is best used in conjunction with this article (freely available on the Web sites of PLoS Medicine at <http://www.plosmedicine.org/>, Annals of Internal Medicine at <http://www.annals.org/>, and Epidemiology at <http://www.epidem.com/>). Information on the STROBE Initiative is available at [www.strobe-statement.org](http://www.strobe-statement.org).

# BMJ Open

## The Diagnostic Value of Triglyceride-Glucose Index and Related Parameters in Metabolism-associated Fatty Liver Disease in a Chinese Population: A cross-sectional study

|                                 |                                                                                                                                                                                                                                                                                                                                                                                                                                                                                                                                                                                                                                                                                                                                                                                                         |
|---------------------------------|---------------------------------------------------------------------------------------------------------------------------------------------------------------------------------------------------------------------------------------------------------------------------------------------------------------------------------------------------------------------------------------------------------------------------------------------------------------------------------------------------------------------------------------------------------------------------------------------------------------------------------------------------------------------------------------------------------------------------------------------------------------------------------------------------------|
| Journal:                        | <i>BMJ Open</i>                                                                                                                                                                                                                                                                                                                                                                                                                                                                                                                                                                                                                                                                                                                                                                                         |
| Manuscript ID                   | bmjopen-2023-075413.R2                                                                                                                                                                                                                                                                                                                                                                                                                                                                                                                                                                                                                                                                                                                                                                                  |
| Article Type:                   | Original research                                                                                                                                                                                                                                                                                                                                                                                                                                                                                                                                                                                                                                                                                                                                                                                       |
| Date Submitted by the Author:   | 08-Sep-2023                                                                                                                                                                                                                                                                                                                                                                                                                                                                                                                                                                                                                                                                                                                                                                                             |
| Complete List of Authors:       | Yu, Rong; Fujian Medical University, Department of Epidemiology and Health Statistics<br>Xie, Weijiang; Fujian Medical University, Department of Epidemiology and Health Statistics<br>Peng, Hewei; Fujian Medical University, Department of Epidemiology and Health Statistics<br>Lu, Lili; General Administration of Customs of the People's Republic of China, Xiamen Customs, People's Republic of China<br>Yin, Shuo; Fujian Medical University, Department of Epidemiology and Health Statistics<br>xu, shanghua; Department of Cardiology, Affiliated Nanping First Hospital, Fujian Medical University<br>Hu, Zhijian; Fujian Medical University, Department of Epidemiology and Health Statistics<br>Peng, Xian-E; Fujian Medical University, Department of Epidemiology and Health Statistics |
| <b>Primary Subject Heading</b>: | Public health                                                                                                                                                                                                                                                                                                                                                                                                                                                                                                                                                                                                                                                                                                                                                                                           |
| Secondary Subject Heading:      | Epidemiology                                                                                                                                                                                                                                                                                                                                                                                                                                                                                                                                                                                                                                                                                                                                                                                            |
| Keywords:                       | EPIDEMIOLOGY, Hepatology < INTERNAL MEDICINE, Lipid disorders < DIABETES & ENDOCRINOLOGY                                                                                                                                                                                                                                                                                                                                                                                                                                                                                                                                                                                                                                                                                                                |
|                                 |                                                                                                                                                                                                                                                                                                                                                                                                                                                                                                                                                                                                                                                                                                                                                                                                         |

SCHOLARONE™  
Manuscripts



I, the Submitting Author has the right to grant and does grant on behalf of all authors of the Work (as defined in the below author licence), an exclusive licence and/or a non-exclusive licence for contributions from authors who are: i) UK Crown employees; ii) where BMJ has agreed a CC-BY licence shall apply, and/or iii) in accordance with the terms applicable for US Federal Government officers or employees acting as part of their official duties; on a worldwide, perpetual, irrevocable, royalty-free basis to BMJ Publishing Group Ltd ("BMJ") its licensees and where the relevant Journal is co-owned by BMJ to the co-owners of the Journal, to publish the Work in this journal and any other BMJ products and to exploit all rights, as set out in our [licence](#).

The Submitting Author accepts and understands that any supply made under these terms is made by BMJ to the Submitting Author unless you are acting as an employee on behalf of your employer or a postgraduate student of an affiliated institution which is paying any applicable article publishing charge ("APC") for Open Access articles. Where the Submitting Author wishes to make the Work available on an Open Access basis (and intends to pay the relevant APC), the terms of reuse of such Open Access shall be governed by a Creative Commons licence – details of these licences and which [Creative Commons](#) licence will apply to this Work are set out in our licence referred to above.

Other than as permitted in any relevant BMJ Author's Self Archiving Policies, I confirm this Work has not been accepted for publication elsewhere, is not being considered for publication elsewhere and does not duplicate material already published. I confirm all authors consent to publication of this Work and authorise the granting of this licence.

1  
2  
3 **The Diagnostic Value of Triglyceride-Glucose Index and Related**  
4 **Parameters in Metabolism-associated Fatty Liver Disease in a Chinese**  
5  
6 **Population: A cross-sectional study**  
7  
8  
9

10 Rong Yu<sup>1†</sup>, Weijiang Xie<sup>1†</sup>, Hewei Peng<sup>1†</sup>, Lili Lu<sup>2</sup>, Shuo Yin<sup>1</sup> Shanghua Xu<sup>4</sup>, Zhijian  
11 Hu<sup>1</sup>, and Xian-E Peng<sup>1,3\*</sup>  
12  
13

14 \* Corresponding author  
15

16 Xian-E Peng  
17

18 Mail address: Department of Epidemiology and Health Statistics, Xuefu North Road  
19  
20  
21 1st, Shangjie Town, Minhou Country, Fuzhou, Fujian, 350108, China.  
22

23 Tel and Fax: +86-591-22862648  
24

25 Email: [fmuxe@163.com](mailto:fmuxe@163.com)  
26  
27

28  
29  
30 <sup>1</sup> Department of Epidemiology and Health Statistics, Fujian Provincial Key Laboratory  
31 of Environment Factors and Cancer, School of Public Health, Fujian Medical  
32 University, Fuzhou, 350122, People's Republic of China  
33

34  
35  
36 <sup>2</sup> Xiamen Customs, People's Republic of China, Xiamen 361006, People's Republic of  
37  
38 China  
39

40  
41 <sup>3</sup> Key Laboratory of Ministry of Education for Gastrointestinal Cancer, Fujian Medical  
42 University, Fuzhou 350108, People's Republic of China  
43  
44

45  
46 <sup>4</sup> Department of Cardiology, Affiliated Nanping First Hospital, Fujian Medical  
47 University, Nanping, China, 353000, People's Republic of China  
48  
49

50  
51  
52 † These authors contributed equally to this work  
53  
54

55  
56  
57 Word count: 2607  
58  
59  
60



## Abstract

**Objective** Our study aimed to explore the diagnostic value of Triglyceride-Glucose (TyG) and its related parameters in metabolism-associated fatty liver disease (MAFLD).

**Design** A cross-sectional study of residents who attended medical checkups at the First Hospital of Nanping City, Fujian Medical University, between 2015 and 2017.

**Setting** One participation center.

**Participants** 2605 subjects met the inclusion-exclusion criteria and were grouped according to whether they had MAFLD.

**Results** The TyG index and its associated parameters are positively associated with the risk of developing MAFLD ( $P < 0.001$ ). Restriction cube spline (RCS) analysis showed a significant dose-response relationship between the TyG index and MAFLD. The risk of developing MAFLD increases significantly with a higher TyG index. After adjusting for confounders, this relationship remains ( $OR: 4.89, 95\%CI: 3.98-6.00$ ). The areas under the receiver operating characteristic curves (AUROC) of the TyG index for MAFLD detection were 0.793 (0.774-0.812). The areas under the curve (AUC) of TyG-related parameters were improved, among which TyG-waist circumference (TyG-WC) showed the largest AUC for MAFLD detection (0.873, 95%CI: 0.860-0.887). In addition, the best cut-off value of the TyG-WC was 716.743, with a sensitivity and specificity of 88.7% and 71.4%, respectively.

**Conclusion** The TyG index effectively identifies MAFLD, and the TyG-related parameters improved the identification and diagnosis of MAFLD, suggesting that TyG-related parameters, especially TyG-WC, may be a useful marker for diagnosing MAFLD.

**Keywords:** Metabolic-associated Fatty Liver Disease; Triglyceride-Glucose; TyG Related Parameters.

### Strengths and limitations of this study

- We combined metabolic-related indices with the TyG index to diagnose MFALD with a comprehensive index.
- This study used the latest diagnostic criteria to define MAFLD.
- The strengths of this study are the large sample size and the rigorous screening of subjects.
- A more comprehensive range of confounding variables was considered compared to previous studies.
- Measurement error in self-reported dietary habits and other data in this study is unavoidable.

### Introduction

Non-alcoholic fatty liver disease (NAFLD), with hepatic steatosis as the main pathological manifestation, can progress to cirrhosis and hepatocellular carcinoma(HCC)(1,2), affecting approximately one-quarter of the adult population worldwide(3). In recent years, there has been increasing recognition of the inherent flaws in the term "non-alcoholic". It overemphasizes the presence or absence of alcohol use disorders and ignores the importance of metabolic risk for NAFLD progression. As such, an international panel of experts renamed NAFLD to metabolism-associated fatty liver disease (MAFLD) in 2020(4). MAFLD is a more appropriate disease designation for liver diseases associated with metabolic dysfunction(5). Due to its high global prevalence, it poses a serious threat to human health and a huge economic burden to society(6). Steatosis is a reversible condition in its early stages and can be addressed through behavioral changes(7,8). For example, increasing physical activity and controlling energy intake are particularly effective interventions in the early stages of the disease(9,10). However, the aggressive form of steatohepatitis can progress to

1  
2  
3 fibrosis and eventually cirrhosis, which is irreversible damage(11). Due to the high  
4 prevalence of MAFLD and its progressive nature, the early detection of MAFLD is of  
5 great significance to enable the provision of early intervention, thus avoiding the  
6 progression of MAFLD(12).  
7  
8  
9  
10

11  
12 Although the gold standard for identifying fatty liver disease (FLD) is still liver  
13 biopsy, it is unsuitable for large-scale epidemiological surveys because of its  
14 invasiveness, poor acceptability, cost, and sampling variability(12). Thus, it is  
15 necessary to develop a simple tool to identify MAFLD. Significant progress has been  
16 made in the noninvasive assessment of FLD in recent years, including fatty liver index  
17 (FLI) and hepatic steatosis index (HSI)(13). The FLI is a prevalent biomarker panel  
18 consisting of body mass index (BMI), waist circumference, triglycerides, and gamma-  
19 glutamyl transferase(14). The HSI is a biomarker panel consisting of BMI, diabetes,  
20 and the alanine transaminase(ALT)/aspartate transaminase(AST) ratio(15). However,  
21 the calculation process of both indices is more complicated and involves more traits  
22 and indicators. An ideal noninvasive test should be simple, easily accessible, cost-  
23 effective, and efficient and allow easy visualization to detect and identify people at high  
24 risk of MAFLD(16). With such a test, large-scale population-wide screening and  
25 preventive programs in large populations would be possible. Prior studies have  
26 confirmed that insulin resistance (IR) is an important pathogenic mechanism in  
27 MAFLD(17). Homeostasis model assessment of insulin resistance (HOMA-IR) is the  
28 gold standard diagnostic method of IR and has an excellent diagnostic effect on  
29 MAFLD(18). However, HOMA-IR is costly, time-consuming, and complex, which  
30 limits its widespread implementation in large epidemiological investigations(19). TyG,  
31 a noninvasive index calculated from fasting glucose and triglycerides, has been  
32 proposed as a reliable marker for IR in clinical practice(20). Since MAFLD is  
33  
34  
35  
36  
37  
38  
39  
40  
41  
42  
43  
44  
45  
46  
47  
48  
49  
50  
51  
52  
53  
54  
55  
56  
57  
58  
59  
60

1  
2  
3 associated with IR and dyslipidemia, the TyG index is also considered a useful  
4  
5 predictive marker for MAFLD(21). However, the results from epidemiological studies  
6  
7 remain controversial(22). The longitudinal association between baseline TyG index and  
8  
9 the risk of MAFLD was assessed in a cohort study conducted in Jiangsu, China, which  
10  
11 included 2056 subjects(21). The results showed that the TyG index was independently  
12  
13 associated with the risk of developing MAFLD ( $HR: 1.784, 95\%CI: 1.383-2.302, P <$   
14  
15  $0.001$ )(21). A cross-sectional study in US adults also showed a positive association  
16  
17 between the TyG index and the risk of MAFLD/NAFLD; as for MAFLD, TyG-WC  
18  
19 presented the highest  $OR$  ( $OR: 28.435, 95\%CI: 12.121-66.705$ )(23). However, the  
20  
21 sample sizes of these studies were small, and more large prospective studies are needed  
22  
23 to validate the association between the two further. Nanping City is located in the north  
24  
25 of Fujian Province. Our previous study reported the prevalence of NAFLD (32.8%) in  
26  
27 the population with physical examination in Nanping(24), which is higher than in other  
28  
29 cities in Fujian province(25). The present study aimed to investigate the association of  
30  
31 the TyG index and its related parameters with MAFLD in Nanping and to assess their  
32  
33 diagnostic efficacy for MAFLD.  
34  
35  
36  
37  
38

## 39 **Material and Methods**

### 40 **Study subjects and design**

41  
42  
43 This cross-sectional study included 2605 subjects who underwent a physical  
44  
45 examination and completed an abdominal ultrasound examination at Nanping First  
46  
47 Hospital, Fujian Medical University (Nanping, China) between April 2015 and August  
48  
49 2017. The study protocol conformed to the ethical guidelines of the 1,975 Declaration  
50  
51 of Helsinki (6th revision, 2008) and was approved by the Ethics Committee of Fujian  
52  
53 Medical University(ethical approval number 2014096). All the participants provided  
54  
55 their informed consent before the study started.  
56  
57  
58  
59  
60

1  
2  
3 The inclusion criteria for participants in the current study were permanent  
4 residency in Nanping, aged between 18 and 75 years, and completed ultrasonography  
5 examination. The diagnosis of FLD in this study was primarily based on  
6 ultrasonographic findings rather than a liver biopsy(26) because recent standardized  
7 criteria have significantly improved the diagnostic accuracy of ultrasonography so that  
8 even minor degrees of steatosis can be detected. Subjects with malignant tumors,  
9 incomplete data, or pregnant or lactating women were excluded.

### 19 **Data collection and measure**

21 Data on MAFLD risk factors were obtained through direct interviews with the help  
22 of a structured medical questionnaire. The risk factors included were age, gender,  
23 marital status, income, educational level, smoking, drinking, lifestyle, dietary habits,  
24 medical history, and family history of MAFLD. After an overnight fast, all subjects  
25 underwent a physical examination in the morning. The clinical variables collected were  
26 height (m<sup>2</sup>), weight (kg), waist circumference (WC, cm), hip circumference (HC, cm),  
27 Waist-to-Hip Ratio (WHR), diastolic blood pressure (DBP, mmHg), and systolic blood  
28 pressure (SBP, mmHg), serum triglyceride (TG, mg/dL), total cholesterol (TC,  
29 mmol/L), low-density lipoprotein (LDL, mmol/L), and high-density lipoprotein (HDL,  
30 mmol/L), fasting plasma glucose (FPG, mg/dL), Gamma-glutamyltransferase (GGT,  
31 U/L) alanine transaminase(ALT, U/L), and aspartate aminotransferase (AST, U/L). All  
32 these variables were assessed using standard procedures (TG: 1mmol/L=88.5mg/dL;  
33 FPG: 1mmol/L=18mg/dL). Body mass index (BMI) was calculated as body  
34 weight/(height)<sup>2</sup>. Food consumption was assessed with the help of a food frequency  
35 questionnaire, and total consumption was calculated by multiplying the frequency of  
36 food consumption by the amount of food consumed each time. Hypertension was  
37 defined as systolic blood pressure  $\geq 140$  mmHg and/or diastolic blood pressure  $\geq 90$   
38  
39  
40  
41  
42  
43  
44  
45  
46  
47  
48  
49  
50  
51  
52  
53  
54  
55  
56  
57  
58  
59  
60

1  
2  
3 mmHg or the current use of anti-hypertensive medication(27). Diabetes was defined as  
4  
5 fasting plasma glucose  $\geq 7.0$  mmol/L or the current use of hypoglycemic agents(28).  
6  
7

### 8 **Triglyceride-Glucose Index and Related Parameters**

9  
10 The TyG index and its related parameters were calculated according to the  
11  
12 previous studies(20,26). The specific calculation formulas were as follows:  
13

14  
15 (1)  $TyG = \ln [\text{fasting triglyceride (mg/dl)} \times \text{fasting plasma glucose (mg/dl)} / 2]$ ;

16  
17 (2)  $TyG-WC = TyG \times WC$ ;

18  
19 (3)  $TyG-BMI = TyG \times BMI$ ;

20  
21 (4)  $TyG-WHR = TyG \times WHR$ ;

### 22 **Diagnostic of FLD**

23  
24 Liver ultrasonography is used to diagnose fatty liver. The presence of criteria (i)  
25  
26 and any of criteria (ii) through (iv) indicates the presence of fatty liver: (i) Diffuse  
27  
28 enhancement of the near-field echoes of the liver and gradual attenuation of the far-  
29  
30 field echoes of the liver; (ii) Mild to moderate hepatomegaly with rounded obtuse  
31  
32 borders; (iii) unclear structure of intrahepatic ducts; (iv) Reduced hepatic blood flow  
33  
34 signal.  
35  
36  
37  
38  
39

### 40 **Diagnosis of MAFLD**

41  
42 MAFLD is diagnosed by ultrasound showing hepatic steatosis and having one of  
43  
44 the following three criteria(3): (1) overweight or obesity ( $BMI \geq 23.0 \text{ kg/m}^2$  for Asians);  
45  
46 (2) type 2 diabetes mellitus (T2DM); and (3) metabolic dysregulation among non-  
47  
48 overweight individuals ( $BMI < 23.0 \text{ kg/m}^2$ ). The metabolic disorder was defined as the  
49  
50 presence of at least two of the following metabolic risk abnormalities: (1)  $WC \geq 90$  cm  
51  
52 for Asian men and 80 cm for Asian women; (2)  $BP \geq 130/85$  mmHg or specific drug  
53  
54 treatment; (3)  $TG \geq 1.70$  mmol/L or specific drug treatment; (4)  $HDL-c < 1.0$  mmol/L  
55  
56 for men and  $< 1.3$  mmol/L for women; (5) prediabetes; (6)  $HOMA-IR \geq 2.5$ ; and (7) C-  
57  
58  
59  
60

1  
2  
3 reactive protein (CRP) > 2 mg/L. Non-overweight individuals meeting any two or more  
4  
5 metabolic disorders are diagnosed as MAFLD.  
6

### 7 8 **Statistical Analyses**

9  
10 The baseline characteristics of subjects were analyzed using the Nonparametric  
11  
12 Kruskal-Wallis test for non-normal continuous variables and the Chi-Square test for  
13  
14 nominal variables. Continuous variables were expressed as median (interquartile range,  
15  
16 IQR). Univariate and multivariate logistic regression methods were used to analyze the  
17  
18 association of TyG and related parameters with MAFLD risk. The restricted cubic  
19  
20 spline (RCS) was used to explore the dose-response relationship between TyG and its  
21  
22 related parameters and the risk of MAFLD. The predictive value of TyG and related  
23  
24 parameters were compared using the area under receiver operating characteristic  
25  
26 (AUROC). The Net Reclassification Index (NRI) and the Integrated Discrimination  
27  
28 Improvement Index (IDI) were used to reflect the overall improvement of the diagnostic  
29  
30 model. All analyses were performed in R (version 4.2.1, R Foundation) software or  
31  
32 Statistical Product and Service Solutions (SPSS) 26.0 software. All *P* values were based  
33  
34 on the two-sided test, and *P*<0.05 was considered statistically significant.  
35  
36  
37  
38  
39

### 40 **Patient and Public Involvement**

41  
42 Patients or the public were not involved in our research's design, conduct, reporting, or  
43  
44 dissemination plans.  
45

## 46 **Results**

### 47 **Baseline characteristics**

48  
49 Demographic and lifestyle habits and clinical characteristics are detailed in Table  
50  
51 1 and Table 2. Of the 2605 participants, 747 had FLD, with an FLD prevalence of  
52  
53 28.68%; 726 were MAFLD patients, and the prevalence of MAFLD was 27.9%. The  
54  
55 mean age of the participants was 45 years, and 56.5% of the subjects were male.  
56  
57  
58  
59  
60

1  
2  
3 Compared to those without MAFLD, subjects with MAFLD were more likely to be  
4 male, older, married, smokers, drinkers, tea drinkers, and have a history of diabetes or  
5 hypertension (all  $P<0.05$ ). In addition, the subjects in both groups were different in  
6 terms of clinical detection indicators (SBP, DBP, TG, FPG, TC, GGT, HDL, BMI, WC,  
7 WHR, FLI, and HSI) (all  $P<0.001$ ).  
8  
9

### 14 **Association of MAFLD with TyG and its related parameters**

16  
17 The associations between MAFLD and TyG and its related parameters were  
18 mainly analyzed using the logistic regression model. In the crude model, TyG and its  
19 related parameters were positively correlated with MAFLD risk (Table 3). The positive  
20 correlations of TyG and its related parameters with MAFLD remained unchanged after  
21 adjusting for gender, age, marital status, and educational level in model 1 (each  
22  $P<0.001$ ). Model 2 further adjusted for variables such as smoking, drinking, and tea  
23 drinking based on model 1. The results remained unchanged (each  $P<0.001$ ). The  
24 results remained similar after adjusting some disease history indicators in model 3.  
25  
26  
27  
28  
29  
30  
31  
32  
33

34  
35 The restricted cubic spline analyses were applied to interpret the dose-response  
36 relationships of TyG and its related parameters with MAFLD risk (Figure 1). The *ORs*  
37 of MAFLD increased with increasing TyG levels. The *ORs* of MAFLD also rose with  
38 the increasing TyG-BMI, TyG-WC, and TyG-WHR.  
39  
40  
41  
42  
43

### 44 **Assessment of the accuracy of TyG and its related parameters for the diagnosis of** 45 **MAFLD**

46  
47  
48 The ROC curve for the ability of TyG and its related parameters and traditional  
49 indicators to predict the risk of MAFLD is shown in Figure 2. The performance of these  
50 models is detailed in Supplement Table 1. The AUROCs of TyG and related parameters  
51 were greater than traditional indicators, including the HSI. The TyG-WC performed the  
52 highest AUROC (0.873, 95%*CI*: 0.860-0.887,  $P<0.001$ ), compared with TyG-BMI  
53  
54  
55  
56  
57  
58  
59  
60



1  
2  
3 (0.862, 95%CI: 0.847-0.876,  $P<0.001$ ), TyG-WHR (0.836, 95%CI: 0.820-0.852,  
4  
5  $P<0.001$ ). Based on the results of NRI, it can be seen that the accuracy of TyG-WC,  
6  
7 TyG-BMI, and TyG-WHR were improved by 26.4%, 18.7%, and 12.5%, respectively,  
8  
9 compared with TyG (all  $P<0.001$ ). Moreover, the IDI values of TyG-WC, TyG-BMI,  
10  
11 and TyG-WHR were 0.148, 0.125, and 0.071, respectively, which were all greater than  
12  
13 0, indicating that the diagnostic ability of the TyG-related parameters improved  
14  
15 compared with the TyG index alone. The related results are shown in Supplementary  
16  
17 Table 2.  
18  
19  
20  
21

## 22 Discussion

23  
24 In this cross-sectional study, different parameters were tested to predict the  
25  
26 presence of MAFLD. The results showed that the TyG index and its associated  
27  
28 parameters were independent predictors of MAFLD. Advanced results of ROC curve  
29  
30 analysis showed that TyG-BMI, TyG-WC, and TyG-WHR, especially TyG-WC, had  
31  
32 better diagnostic values than the TyG index alone in diagnosing MAFLD.  
33  
34

35  
36 Previous studies have shown that factors such as obesity and metabolic disorders  
37  
38 contribute to the onset and progression of MAFLD(29). Simple measures such as BMI,  
39  
40 WC, and FLI have been independently correlated with MAFLD(30-32). These findings  
41  
42 were validated in the present study. BMI, WC, and FLI were better predictors of  
43  
44 MAFLD than TC, TG, and FPG. The TyG index is a combination of FPG and TG.  
45  
46 Some studies have reported that this index can be used as a surrogate marker for IR and  
47  
48 effectively identify MAFLD(21), further confirmed by our findings. The present study's  
49  
50 analysis revealed that the AUC of the TyG index for predicting MAFLD was up to  
51  
52 0.793. It has been well-documented that the TyG index is a reliable indicator of IR(33).  
53  
54 IR induces an imbalance in glucose metabolism, leading to hyperglycemia, which  
55  
56 triggers inflammation and oxidative stress(34). It has been proven that oxidative stress  
57  
58  
59  
60

1  
2  
3 and chronic inflammation are associated with the development of MAFLD(35). In  
4  
5 addition, previous studies have shown that IR leads to high intrahepatic triglycerides  
6  
7 by stimulating hepatic de novo lipogenesis (DNL) and hepatic gluconeogenesis, among  
8  
9 others. Activated hepatic gluconeogenesis also increases blood glucose levels(36).  
10  
11 High intrahepatic triglycerides and fasting blood glucose are the distinguishing features  
12  
13 of diagnostic MAFLD pairs. Therefore, using the TyG index as a valid diagnostic  
14  
15 indicator of MAFLD is logical.  
16  
17

18  
19 The TyG index-related parameter combines the TyG index with WC, BMI, and  
20  
21 WHR. It has been shown that TyG index-related parameters are the best predictors of  
22  
23 IR compared with visceral obesity indicators and adipokines(37), consistent with the  
24  
25 results of the present study. Previous studies have shown that FLI and HSI have strong  
26  
27 diagnostic abilities for MAFLD(38). In the present study, the area under the ROC curve  
28  
29 of the TyG-WC index for diagnosing MAFLD was greater than that of FLI and HSI,  
30  
31 and it was more effective in diagnosing MAFLD. The ideal noninvasive test should be  
32  
33 simple, easy to use, economical, efficient, and convenient for detecting and identifying  
34  
35 people at risk for MAFLD. Although the TyG index and its associated parameters do  
36  
37 not differ significantly from the diagnostic performance of the FLI, the TyG index and  
38  
39 its related parameters provide a better balance of the above requirements. Also, among  
40  
41 the TyG-related parameters, TyG-WC had a stronger diagnostic performance than  
42  
43 TyG-BMI, TyG-WC, and TyG-WHR. The most probable explanation for the  
44  
45 appearance of this phenomenon is that hepatic steatosis correlates with body mass index  
46  
47 but correlates more strongly with visceral fat (as measured by WC) because the lipid  
48  
49 activity of visceral adipose tissue (VAT) is higher than that of subcutaneous fat, on a  
50  
51 per unit weight basis(39). The findings of Khamseh et al. are consistent with ours(40).  
52  
53 The AUROC for the TyG index, TyG-BMI, and TyG-WC were 0.676, 0.675, and 0.693,  
54  
55  
56  
57  
58  
59  
60

1  
2  
3 respectively, lower than those derived in the present study. This discrepancy may be  
4 attributed to the small number of overweight/obese participants in their study. TyG and  
5 its related parameters were found to be effective in diagnosing MAFLD in a cross-  
6 sectional study utilizing the NHANES database to include 1727 adults, and the  
7 diagnostic value was superior to other predictors of MAFLD(41).  
8  
9

10  
11  
12  
13  
14  
15 The strengths of this study are the large sample size, rigorous screening criteria,  
16 and application of the most recent standardized diagnostic criteria for defining MAFLD.  
17 However, there are some limitations to this study. First, this was a cross-sectional study,  
18 and causality could not be established. Second, self-reported dietary habits and other  
19 data are inevitably subject to measurement error. However, because all participants and  
20 researchers in this study were blinded to the results of abdominal ultrasonography and  
21 blood tests, the absence of differential reporting bias may have weakened our observed  
22 associations. Third, unmeasured confounders are also possible in an observational study,  
23 even if we consider all potential confounders. In addition, our sample was limited to  
24 Chinese adults, and it is unclear whether the findings apply to other populations.  
25  
26  
27  
28  
29  
30  
31  
32  
33  
34  
35  
36

### 37 **Conclusions**

38  
39  
40 Our study demonstrated that the TyG index effectively identifies MAFLD, and the  
41 TyG-related parameters improved the identification and diagnosis of MAFLD. As an  
42 inexpensive and convenient index, TyG and its related parameters, especially TyG-WC,  
43 maybe a useful marker for identifying MAFLD.  
44  
45  
46  
47  
48  
49  
50  
51  
52  
53  
54  
55  
56  
57  
58  
59  
60

## Acknowledgments

We want to express our gratitude to all participants for their cooperation and to all staff for recruiting subjects and their technical assistance.

## Author Contributions

PXE designed the study. YR, XWJ, PHW, LLL, and YS collected the data. YR analyzed the data. YR, XWJ, PHW, and LLL contributed to interpreting the results. YR, XWJ, and PHW drafted the manuscript. PXE, XSH, and HZJ revised the manuscript. All authors have discussed the results and commented on the manuscript. All authors read and approved the final manuscript.

## Funding

This work was supported by the National Natural Science Foundation of China (No. 81473047), the Natural Science Foundation of Fujian Province (No. 2019J01316), and the Natural Science Foundation of Fujian Province (No. 2023J01628).

## Abbreviations

NAFLD: Non-alcoholic fatty liver disease; MAFLD: metabolism-associated fatty liver disease; FLI fatty: liver index; HSI: hepatic steatosis index; BMI: body mass index; ALT: alanine transaminase; AST: aspartate transaminase; IR: insulin resistance; HOMA-IR: Homeostasis model assessment of insulin resistance; TyG: Triglyceride glucose index; TG: triglyceride; TC: total cholesterol; LDL-C: low-density lipoprotein cholesterol; HDL-C: high-density lipoprotein cholesterol; FPG: fasting plasma-glucose; WC: Waist circumference; IQR: interquartile range; RCS: restricted cubic spline; AUC: Area under curve; AUROC: area under receiver operating characteristic; NRI: Net Reclassification Index; IDI: Integrated Discrimination Improvement; UA: uric acid; VAT: visceral adipose tissue

## Data sharing statement

1  
2  
3 Data are stored in the Department of Epidemiology and Health Statistics, Fujian  
4 Provincial Key Laboratory of Environment Factors and Cancer, School of Public  
5 Health, Fujian Medical University, Fujian, China. Data are available upon request from  
6  
7  
8 Xian-E Peng; Email address: fmuxe@163.com.  
9  
10

### 11 **Ethics approval and consent to participate**

12  
13  
14 The current study complied with the Declaration of Helsinki, and the Ethics Committee  
15 of Fujian Medical University approved the study protocol (ethics number 2014096).  
16  
17 All subjects provided their informed consent before participating in this study.  
18  
19

### 20 **Competing interests**

21  
22 The authors declare that they have no competing interests.  
23  
24

### 25 **Consent for publication**

26  
27 Not applicable.  
28  
29  
30  
31  
32  
33  
34  
35  
36  
37  
38  
39  
40  
41  
42  
43  
44  
45  
46  
47  
48  
49  
50  
51  
52  
53  
54  
55  
56  
57  
58  
59  
60

## References

1. Eslam M, Valenti L, Romeo S. Genetics and epigenetics of NAFLD and NASH: Clinical impact. *J Hepatol*. 2018;68(2):268-79.
2. Papatheodoridi M, Cholongitas E. Diagnosis of Non-alcoholic Fatty Liver Disease (NAFLD): Current Concepts. *Curr Pharm Des*. 2018;24(38):4574-86.
3. Eslam M, Newsome PN, Sarin SK, Anstee QM, Targher G, Romero-Gomez M, et al. A new definition for metabolic dysfunction-associated fatty liver disease: An international expert consensus statement. *J Hepatol*. 2020;73(1):202-9.
4. Liao X, Ma Q, Wu T, Shao C, Lin Y, Sun Y, et al. Lipid-Lowering Responses to Dyslipidemia Determine the Efficacy on Liver Enzymes in Metabolic Dysfunction-Associated Fatty Liver Disease with Hepatic Injuries: A Prospective Cohort Study. *Diabetes Metab Syndr Obes*. 2022;15:1173-84.
5. Su W, Chen M, Xiao L, Du S, Xue L, Feng R, et al. Association of metabolic dysfunction-associated fatty liver disease, type 2 diabetes mellitus, and metabolic goal achievement with risk of chronic kidney disease. *Front Public Health*. 2022;10:1047794.
6. Wang X, Liu X, He P, Guan K, Yang Y, Lei Y, et al. The Imbalance of Mitochondrial Homeostasis of Peripheral Blood-Derived Macrophages Mediated by MAFLD May Impair the Walking Ability of Elderly Patients with Osteopenia. *Oxid Med Cell Longev*. 2022;2022:5210870.
7. Foghsgaard S, Andreasen C, Vedtofte L, Andersen ES, Bahne E, Strandberg C, et al. Non-alcoholic Fatty Liver Disease Is Prevalent in Women With Prior Gestational Diabetes Mellitus and Independently Associated With Insulin Resistance and Waist Circumference. *Diabetes Care*. 2017;40(1):109-16.

- 1  
2  
3  
4 8. Sasso M, Miette V, Sandrin L, Beaugrand M. The controlled attenuation parameter (CAP):  
5  
6 a novel tool for the noninvasive evaluation of steatosis using Fibroscan. *Clin Res Hepatol*  
7  
8  
9 *Gastroenterol.* 2012;36(1):13-20.  
10
- 11 9. Rinella ME, Sanyal AJ. Management of NAFLD: a stage-based approach. *Nat Rev*  
12  
13 *Gastroenterol Hepatol.* 2016;13(4):196-205.  
14
- 15 10. El-Agroudy NN, Kurzbach A, Rodionov RN, O'Sullivan J, Roden M, Birkenfeld AL, et al.  
16  
17 Are Lifestyle Therapies Effective for NAFLD Treatment? *Trends Endocrinol Metab.*  
18  
19  
20 2019;30(10):701-9.  
21  
22
- 23 11. Yong HY, Larrouy-Maumus G, Zloh M, Smyth R, Ataya R, Benton CM, et al. Early detection  
24  
25 of metabolic changes in drug-induced steatosis using metabolomics approaches. *RSC Adv.*  
26  
27  
28 2020;10(67):41047-57.  
29  
30
- 31 12. Castera L, Friedrich-Rust M, Loomba R. Noninvasive Assessment of Liver Disease in  
32  
33 Patients With Non-alcoholic Fatty Liver Disease. *Gastroenterology.* 2019;156(5):1264-81.e4.  
34  
35
- 36 13. Zhou JH, Cai JJ, She ZG, Li HL. Noninvasive evaluation of non-alcoholic fatty liver disease:  
37  
38 Current evidence and practice. *World J Gastroenterol.* 2019;25(11):1307-26.  
39  
40
- 41 14. Wang J, Qi Y, Xin Z, Huo Y, Wan Q, Qin Y, et al. Isotemporal substitution of different  
42  
43 behaviour patterns with the presence of MAFLD in Chinese adults. *Liver Int.* 2022;42(12):2683-  
44  
45  
46 95.  
47  
48
- 49 15. Li H, Zhang Y, Luo H, Lin R. The lipid accumulation product is a powerful tool to diagnose  
50  
51 metabolic dysfunction-associated fatty liver disease in the United States adults. *Front*  
52  
53 *Endocrinol (Lausanne).* 2022;13:977625.  
54  
55
- 56 16. Pan X, Xie X, Peng H, Cai X, Li H, Hong Q, et al. Risk Prediction for Non-alcoholic Fatty  
57  
58  
59

1  
2  
3  
4 Liver Disease Based on Biochemical and Dietary Variables in a Chinese Han Population. *Front*  
5  
6  
7 *Public Health*. 2020;8:220.

8  
9 17. Ding YS, Guo SX, Ma RL, Li SG, Guo H, Zhang JY, et al. Association of Metabolic  
10  
11  
12  
13  
14  
15  
16  
17  
18  
19  
20  
21  
22  
23  
24  
25  
26  
27  
28  
29  
30  
31  
32  
33  
34  
35  
36  
37  
38  
39  
40  
41  
42  
43  
44  
45  
46  
47  
48  
49  
50  
51  
52  
53  
54  
55  
56  
57  
58  
59  
60

17. Ding YS, Guo SX, Ma RL, Li SG, Guo H, Zhang JY, et al. Association of Metabolic  
Syndrome with the Adiponectin to Homeostasis Model Assessment of Insulin Resistance Ratio.  
*Mediators Inflamm*. 2015;2015:607364.

18. Han M, Wang H, Yang S, Zhu S, Zhao G, Shi H, et al. Triglyceride glucose index and  
Atherogenic index of plasma for predicting colorectal neoplasms in patients without  
cardiovascular diseases. *Front Oncol*. 2022;12:1031259.

19. Luo E, Wang D, Yan G, Qiao Y, Liu B, Hou J, et al. High triglyceride-glucose index is  
associated with poor prognosis in patients with acute ST-elevation myocardial infarction after  
percutaneous coronary intervention. *Cardiovasc Diabetol*. 2019;18(1):150.

20. Alizargar J, Bai CH, Hsieh NC, Wu SV. Use of the triglyceride-glucose index (TyG) in  
cardiovascular disease patients. *Cardiovasc Diabetol*. 2020;19(1):8.

21. Zhang R, Guan Q, Zhang M, Ding Y, Tang Z, Wang H, et al. Association Between  
Triglyceride-Glucose Index and Risk of Metabolic Dysfunction-Associated Fatty Liver Disease:  
A Cohort Study. *Diabetes Metab Syndr Obes*. 2022;15:3167-79.

22. Wang J, Yan S, Cui Y, Chen F, Piao M, Cui W. The Diagnostic and Prognostic Value of  
the Triglyceride-Glucose Index in Metabolic Dysfunction-Associated Fatty Liver Disease  
(MAFLD): A Systematic Review and Meta-Analysis. *Nutrients*. 2022;14(23).

23. Peng H, Pan L, Ran S, Wang M, Huang S, Zhao M, et al. Prediction of MAFLD and NAFLD  
using different screening indexes: A cross-sectional study in U.S. adults. *Front Endocrinol*  
(Lausanne). 2023;14:1083032.



- 1  
2  
3  
4 24. Peng H, Xie X, Pan X, Zheng J, Zeng Y, Cai X, et al. Association of meat consumption  
5  
6 with NAFLD risk and liver-related biochemical indexes in older Chinese: a cross-sectional study.  
7  
8  
9 BMC Gastroenterol. 2021;21(1):221.  
10  
11  
12 25. Xiane Peng ZH, Jianyin Lin, Qingqing Lu, Jun Lin, Xu Lin. Analysis of the prevalence and  
13  
14 influencing factors of non-alcoholic fatty liver disease in staff. China Public Health.  
15  
16 2009;25(10):1235-7.  
17  
18  
19 26. Er LK, Wu S, Chou HH, Hsu LA, Teng MS, Sun YC, et al. Triglyceride Glucose-Body Mass  
20  
21 Index Is a Simple and Clinically Useful Surrogate Marker for Insulin Resistance in Nondiabetic  
22  
23 Individuals. PLoS One. 2016;11(3):e0149731.  
24  
25  
26  
27 27. Koh SM, Chung SH, Yum YJ, Park SJ, Joo HJ, Kim YH, et al. Comparison of the effects  
28  
29 of triglyceride variability and exposure estimate on clinical prognosis in diabetic patients.  
30  
31 Cardiovasc Diabetol. 2022;21(1):245.  
32  
33  
34  
35 28. Mei YX, Zhang ZX, Wu H, Hou J, Liu XT, Sang SX, et al. Health-Related Quality of Life  
36  
37 and Its Related Factors in Survivors of Stroke in Rural China: A Large-Scale Cross-Sectional  
38  
39 Study. Front Public Health. 2022;10:810185.  
40  
41  
42  
43 29. Ijuin S, Oda K, Mawatari S, Taniyama O, Toyodome A, Sakae H, et al. Serine  
44  
45 palmitoyltransferase long chain subunit 3 is associated with hepatocellular carcinoma in  
46  
47 patients with NAFLD. Mol Clin Oncol. 2022;16(2):55.  
48  
49  
50  
51 30. Li H, Guo M, An Z, Meng J, Jiang J, Song J, et al. Prevalence and Risk Factors of Metabolic  
52  
53 Associated Fatty Liver Disease in Xinxiang, China. Int J Environ Res Public Health. 2020;17(6).  
54  
55  
56 31. Wang H, Zhang Y, Liu Y, Li H, Xu R, Fu H, et al. Comparison between traditional and new  
57  
58 obesity measurement index for screening metabolic associated fatty liver disease. Front  
59  
60

1  
2  
3  
4 Endocrinol (Lausanne). 2023;14:1163682.  
5

6 32. Qu J, Dou J, Wang A, Liu Y, Lin L, Chen K, et al. Fatty liver index for hyperuricemia  
7  
8 diagnosis: a community-based cohort study. BMC Endocr Disord. 2022;22(1):114.  
9

10  
11 33. Li T, Yang C, Yang J, Jing J, Ma C. Elevated triglyceride-glucose index predicts mortality  
12  
13 following endovascular abdominal aortic aneurysm repair. Front Nutr. 2023;10:1116425.  
14

15  
16 34. Tao LC, Xu JN, Wang TT, Hua F, Li JJ. Triglyceride-glucose index as a marker in  
17  
18 cardiovascular diseases: landscape and limitations. Cardiovasc Diabetol. 2022;21(1):68.  
19

20  
21 35. Xing Y, Chen J, Liu J, Ma H. Associations Between GGT/HDL and MAFLD: A Cross-  
22  
23 Sectional Study. Diabetes Metab Syndr Obes. 2022;15:383-94.  
24

25  
26 36. van Son KC, Verschuren L, Hanemaaijer R, Reeves H, Takkenberg RB, Drenth JPH, et  
27  
28 al. Non-Parenchymal Cells and the Extracellular Matrix in Hepatocellular Carcinoma in Non-  
29  
30 Alcoholic Fatty Liver Disease. Cancers (Basel). 2023;15(4).  
31  
32

33  
34 37. Sheng G, Lu S, Xie Q, Peng N, Kuang M, Zou Y. The usefulness of obesity and lipid-  
35  
36 related indices to predict the presence of Non-alcoholic fatty liver disease. Lipids Health Dis.  
37  
38 2021;20(1):134.  
39  
40

41  
42 38. Okada A, Yamada G, Kimura T, Hagiwara Y, Yamaguchi S, Kurakawa KI, et al. Diagnostic  
43  
44 ability using fatty liver and metabolic markers for metabolic-associated fatty liver disease  
45  
46 stratified by metabolic/glycemic abnormalities. J Diabetes Investig. 2023;14(3):463-78.  
47  
48

49  
50 39. Gruzdeva O, Borodkina D, Uchasova E, Dyleva Y, Barbarash O. Localization of fat depots  
51  
52 and cardiovascular risk. Lipids Health Dis. 2018;17(1):218.  
53

54  
55 40. Khamseh ME, Malek M, Abbasi R, Taheri H, Lahouti M, Alaei-Shahmiri F. Triglyceride  
56  
57 Glucose Index and Related Parameters (Triglyceride Glucose-Body Mass Index and  
58  
59

1  
2  
3  
4 Triglyceride Glucose-Waist Circumference) Identify Non-alcoholic Fatty Liver and Liver Fibrosis

5  
6 in Individuals with Overweight/Obesity. *Metab Syndr Relat Disord*. 2021;19(3):167-73.

7  
8  
9 41. Xue Y, Xu J, Li M, Gao Y. Potential screening indicators for early diagnosis of

10  
11 NAFLD/MAFLD and liver fibrosis: Triglyceride glucose index-related parameters. *Front*

12  
13  
14  
15  
16  
17  
18  
19  
20  
21  
22  
23  
24  
25  
26  
27  
28  
29  
30  
31  
32  
33  
34  
35  
36  
37  
38  
39  
40  
41  
42  
43  
44  
45  
46  
47  
48  
49  
50  
51  
52  
53  
54  
55  
56  
57  
58  
59  
60  
Endocrinol (Lausanne). 2022;13:951689.

For peer review only

**Figure legends**

**Figure 1.** Restrictive cubic spline modeling of the association between NAFLD and TyG and its related parameters. Red area, 95% confidence interval. Each model was adjusted for gender, age, marital status, educational level, smoking, drinking, tea drinking, history of diabetes, and history of hypertension.

**Figure 2.** ROC curves of TyG and its related parameters and biochemical indexes.

For peer review only

**Table 1. Comparison of general characteristics.**

| Variables                  | Overall<br>(n=2605) | With MAFLD<br>(n=726) | Without MAFLD<br>(n=1879) | P-value* |
|----------------------------|---------------------|-----------------------|---------------------------|----------|
| Age(years), M (IQR)        | 45 (33, 52)         | 43 (31, 51)           | 48 (38, 54)               | <0.001   |
| Gender, n (%)              |                     |                       |                           | <0.001   |
| Males                      | 1471 (56.5)         | 584 (80.4)            | 887 (47.2)                |          |
| Females                    | 1134 (43.5)         | 142 (19.6)            | 992 (52.8)                |          |
| Marital Status, n (%)      |                     |                       |                           | <0.001   |
| Single                     | 378 (14.5)          | 68 (9.4)              | 310 (16.5)                |          |
| Married                    | 2209 (84.8)         | 652 (89.8)            | 1557 (82.9)               |          |
| Divorced                   | 9 (0.4)             | 2 (0.3)               | 7 (0.4)                   |          |
| Widowed                    | 9 (0.4)             | 4 (0.6)               | 5 (0.3)                   |          |
| Educational level, n (%)   |                     |                       |                           | 0.032    |
| Bachelor's degree or above | 913 (35.1)          | 228 (31.4)            | 685 (36.5)                |          |
| Junior college             | 603 (23.2)          | 172 (23.7)            | 431 (22.9)                |          |
| Senior high school         | 593 (22.8)          | 189 (26.0)            | 404 (21.5)                |          |
| Junior high school         | 319 (12.3)          | 87 (12.0)             | 232 (12.3)                |          |
| Primary school             | 140 (5.4)           | 35 (4.8)              | 105 (5.6)                 |          |
| Illiteracy                 | 37 (1.4)            | 15 (2.1)              | 22 (1.2)                  |          |
| Income(yuan/month), n (%)  |                     |                       |                           | 0.066    |
| <2000                      | 147 (5.6)           | 35 (4.8)              | 112 (6.0)                 |          |
| 2000~3000                  | 794 (30.5)          | 202 (27.8)            | 592 (31.5)                |          |
| ≥3000                      | 1664 (63.9)         | 489 (67.4)            | 1175 (62.5)               |          |
| Smoking status, n (%)      |                     |                       |                           | <0.001   |
| Never                      | 1916 (73.6)         | 448 (61.7)            | 1468 (78.1)               |          |
| Former                     | 113 (4.3)           | 45 (6.2)              | 68 (3.6)                  |          |
| Current                    | 576 (22.1)          | 233 (32.1)            | 343 (18.3)                |          |
| Drinking status, n (%)     |                     |                       |                           | <0.001   |

|                                |             |            |             |        |
|--------------------------------|-------------|------------|-------------|--------|
| Never                          | 1624 (62.3) | 389 (53.6) | 1235 (65.7) |        |
| Former                         | 42 (1.6)    | 15 (2.1)   | 27 (1.4)    |        |
| Current                        | 939 (36.1)  | 322 (44.4) | 617 (32.8)  |        |
| Tea drinking status, n (%)     |             |            |             | <0.001 |
| Never                          | 1052 (40.4) | 205 (28.2) | 847 (45.1)  |        |
| Former                         | 8 (0.3)     | 3 (0.4)    | 5 (0.3)     |        |
| Current                        | 1545 (59.3) | 518 (71.3) | 1027 (54.7) |        |
| History of diabetes, n (%)     |             |            |             | <0.001 |
| No                             | 2459 (94.4) | 650 (89.5) | 1809 (96.3) |        |
| Yes                            | 146 (5.6)   | 76 (10.5)  | 70 (3.7)    |        |
| History of hypertension, n (%) |             |            |             | <0.001 |
| No                             | 1666 (64.0) | 294 (40.5) | 1372 (73.0) |        |
| Yes                            | 939 (36.1)  | 432 (59.5) | 507 (27.0)  |        |

Data are presented as median with the interquartile range [M (P25, P75)]. \* Comparison of the differences between the groups calculated by Mann-Whitney U or chi-square tests.

**Table 2. Evaluation of biochemical indices.**

| Variables                       | Overall<br>(n=2605)  | With MAFLD<br>(n=726) | Without MAFLD<br>(n=1879) | P-value* |
|---------------------------------|----------------------|-----------------------|---------------------------|----------|
| BMI(kg/m <sup>2</sup> ), M(IQR) | 22.9 (20.8, 25.1)    | 25.4 (23.9, 27.0)     | 22.0 (20.3, 23.8)         | <0.001   |
| SBP (mmHg), M(IQR)              | 118 (110, 128)       | 125 (118, 136)        | 115 (107, 123)            | <0.001   |
| DBP (mmHg), M(IQR)              | 80 (72, 86)          | 85 (80, 90)           | 78 (70, 82)               | <0.001   |
| TG(mg/dL), M (IQR)              | 109.7 (79.7, 163.8)  | 169.0 (118.6, 243.4)  | 94.7 (73.5, 131.9)        | <0.001   |
| FPG(mg/dL), M (IQR)             | 93.1 (88.4, 99.7)    | 96.7 (91.1, 106.4)    | 92.2 (87.7, 97.2)         | <0.001   |
| TC(mmol/L), M (IQR)             | 5.0 (4.5, 5.6)       | 5.2 (4.7, 5.9)        | 5.0 (4.4, 5.5)            | 0.007    |
| GGT(U/L), M (IQR)               | 23 (16, 36)          | 34 (24, 52)           | 20 (15, 29)               | <0.001   |
| HDL(mmol/L), M (IQR)            | 1.3 (1.1, 1.5)       | 1.2 (1.0, 1.3)        | 1.4 (1.2, 1.5)            | <0.001   |
| WC(cm), M(IQR)                  | 82 (75, 89)          | 90 (85, 95)           | 78 (70, 85)               | <0.001   |
| WHR, M (IQR)                    | 0.9 (0.8, 0.9)       | 0.9 (0.9, 0.9)        | 0.84 (0.8, 0.9)           | <0.001   |
| FLI, M (IQR)                    | 0.3 (0.1, 1.1)       | 1.4 (0.6, 3.4)        | 0.2 (0.1, 0.5)            | <0.001   |
| HSI, M (IQR)                    | 31.6 (28.5, 34.8)    | 35.5 (32.9, 38.6)     | 30.2 (27.7, 32.9)         | <0.001   |
| TyG, M (IQR)                    | 8.6 (8.2, 9.0)       | 9.0 (8.7, 9.4)        | 8.4 (8.1, 8.7)            | <0.001   |
| TyG-WC, M (IQR)                 | 703.1 (623.9, 790.6) | 814.6 (759.2, 875.4)  | 660.9 (600.3, 730.5)      | <0.001   |
| TyG-BMI, M (IQR)                | 197.0 (174.2, 222.6) | 228.8 (211.0, 248.9)  | 184.3 (167.4, 205.1)      | <0.001   |
| TyG-WHR, M (IQR)                | 7.4 (6.7, 8.1)       | 8.2 (7.7, 8.7)        | 7.1 (6.5, 7.7)            | <0.001   |

Data are presented as median with the interquartile range [M (P25, P75)]. \* Comparison of the differences between the groups calculated by the Mann-Whitney U test. BMI, body mass index; SBP, systolic blood pressure; DBP, diastolic blood pressure; TG, serum triglyceride; FPG, fasting

1  
2  
3  
4  
5 plasma glucose; TC, total cholesterol; GGT, Gamma-glutamyltransferase; HDL, high-density lipoprotein; WC, waist circumference; WHR, waist-  
6 to-hip ratio; FLI, fatty liver index; HIS, hepatic steatosis index; TyG, triglyceride-glucose; TyG-WC, triglyceride-glucose-waist circumference;  
7 TyG-BMI, triglyceride-glucose-body mass index; TyG-WHR, triglyceride-glucose- waist-to-hip ratio.  
8  
9  
10  
11  
12  
13  
14  
15  
16  
17  
18  
19  
20  
21  
22  
23  
24  
25  
26  
27  
28  
29  
30  
31  
32  
33  
34  
35  
36  
37  
38  
39  
40  
41  
42  
43  
44  
45  
46

For peer review only



**Table 3. Univariate and multivariate logistic analysis of TyG and related parameters and MAFLD.**

| Variables | Crude model       |                | Model 1 <sup>a</sup> |                | Model 2 <sup>b</sup> |                | Model 3 <sup>c</sup> |                |
|-----------|-------------------|----------------|----------------------|----------------|----------------------|----------------|----------------------|----------------|
|           | <i>OR (95%CI)</i> | <i>P-value</i> | <i>OR (95%CI)</i>    | <i>P-value</i> | <i>OR (95%CI)</i>    | <i>P-value</i> | <i>OR (95%CI)</i>    | <i>P-value</i> |
| TyG       | 6.33 (5.27, 7.60) | <0.001         | 4.96 (4.09, 6.01)    | <0.001         | 5.15 (4.23, 6.27)    | <0.001         | 4.89 (3.98, 6.00)    | <0.001         |
| TyG-WC    | 1.02 (1.01, 1.02) | <0.001         | 1.01 (1.01, 1.02)    | <0.001         | 1.02 (1.01, 1.02)    | <0.001         | 1.01 (1.01, 1.02)    | <0.001         |
| TyG-BMI   | 1.05 (1.05, 1.05) | <0.001         | 1.05 (1.04, 1.05)    | <0.001         | 1.05 (1.04, 1.05)    | <0.001         | 1.05 (1.04, 1.05)    | <0.001         |
| TyG-WHR   | 4.44 (3.89, 5.08) | <0.001         | 4.18 (3.60, 4.87)    | <0.001         | 4.32 (3.70, 5.04)    | <0.001         | 4.08 (3.48, 4.78)    | <0.001         |

<sup>a</sup>: Adjusted for gender, age, marital status, and educational level;

<sup>b</sup>: Adjusted for gender, age, marital status, educational level, smoking, drinking, and tea drinking;

<sup>c</sup>: Adjusted for gender, age, marital status, educational level, smoking, drinking, tea drinking, history of diabetes, and history of hypertension.

TyG, triglyceride-glucose; TyG-WC, triglyceride-glucose-waist circumference; TyG-BMI, triglyceride-glucose-body mass index; TyG-WHR, triglyceride-glucose- waist-to-hip ratio.



Figure 1 Restrictive cubic spline modeling of the association between NAFLD and TyG and its related parameters. Red area, 95% confidence interval. Each model was adjusted for gender, age, marital status, educational level, smoking, drinking, tea drinking, history of diabetes, and history of hypertension

400x294mm (300 x 300 DPI)

1  
2  
3  
4  
5  
6  
7  
8  
9  
10  
11  
12  
13  
14  
15  
16  
17  
18  
19  
20  
21  
22  
23  
24  
25  
26  
27  
28  
29  
30  
31  
32  
33  
34  
35  
36  
37  
38  
39  
40  
41  
42  
43  
44  
45  
46  
47  
48  
49  
50  
51  
52  
53  
54  
55  
56  
57  
58  
59  
60

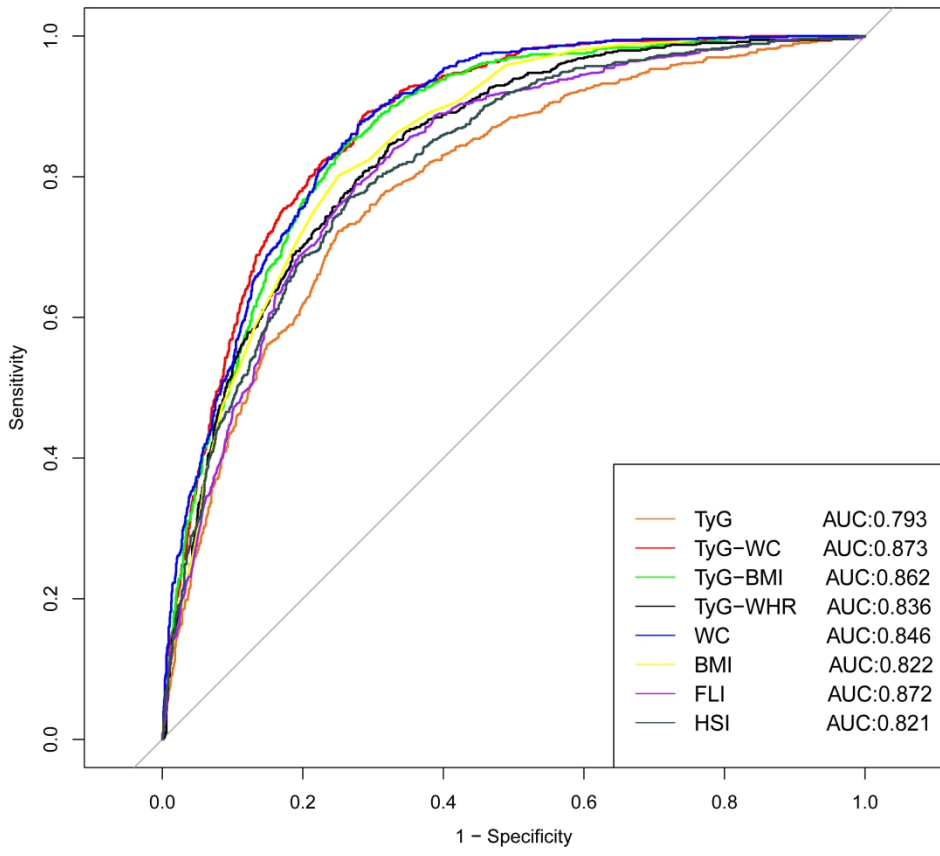

ROC curves of TyG and its related parameters and biochemical indexes  
223x200mm (300 x 300 DPI)

**Supplement Table 1. Area under curve (AUC) analysis.**

| Variables               | AUC (95% CI)         | AIC    | Sensitivity% | Specificity% | optimal cut-off | P -value |
|-------------------------|----------------------|--------|--------------|--------------|-----------------|----------|
| TC(mmol/L)              | 0.588 (0.564, 0.613) | 3206.9 | 58.3%        | 58.6%        | 5.045           | <0.001   |
| GGT(U/L)                | 0.761 (0.742, 0.781) | 2982.7 | 74.8%        | 65.6%        | 24.500          | <0.001   |
| HDL(mmol/L)             | 0.711 (0.689, 0.732) | 3214.3 | 69.1%        | 63.4%        | 1.285           | 1.000    |
| TG(mg/dL)               | 0.784 (0.764, 0.803) | 3057.6 | 68.2%        | 78.0%        | 137.618         | <0.001   |
| FPG(mg/dL)              | 0.653 (0.629, 0.677) | 3085.7 | 55.1%        | 69.7%        | 95.67           | <0.001   |
| WC(cm)                  | 0.846 (0.830, 0.861) | 2378.3 | 80.2%        | 74.9%        | 84.500          | <0.001   |
| BMI(kg/m <sup>2</sup> ) | 0.822 (0.804, 0.839) | 2486.4 | 78.9%        | 72.5%        | 23.525          | <0.001   |
| FLI                     | 0.872 (0.859, 0.886) | 2809.1 | 87.5%        | 72.1%        | 0.419           | <0.001   |
| HSI                     | 0.821 (0.803, 0.838) | 2554.0 | 77.1%        | 73.3%        | 32.715          | <0.001   |
| TyG                     | 0.793 (0.774, 0.812) | 2676.8 | 72.2%        | 75.0%        | 8.738           | <0.001   |
| TyG-WC                  | 0.873 (0.860, 0.887) | 2199.6 | 88.7%        | 71.4%        | 716.743         | <0.001   |
| TyG-BMI                 | 0.862 (0.847, 0.876) | 2239.1 | 85.3%        | 73.3%        | 203.154         | <0.001   |
| TyG-WHR                 | 0.836 (0.820, 0.852) | 2448.0 | 84.6%        | 67.7%        | 7.444           | <0.001   |

AIC, Akaike information criterion; TC, total cholesterol; GGT, Gamma-glutamyltransferase; HDL, high-density lipoprotein; TG, serum triglyceride; FPG, fasting plasma glucose; WC, waist circumference; BMI, body mass index; FLI, fatty liver index; HIS, hepatic steatosis index; TyG, triglyceride-glucose; TyG-WC, triglyceride-glucose-waist circumference; TyG-BMI, triglyceride-glucose-body mass index; TyG-WHR, triglyceride-glucose- waist-to-hip ratio.

Supplement Table 2 NRI and IDI analyses

| Variables               | NRI (95% CI)            | P-value | IDI (95% CI)            | P-value |
|-------------------------|-------------------------|---------|-------------------------|---------|
| TyG                     | Reference               | <0.001  | Reference               | <0.001  |
| TC(mmol/L)              | -0.437 (-0.479, -0.395) | <0.001  | -0.199 (-0.216, -0.182) | <0.001  |
| GGT(mmol/L)             | -0.249 (-0.298, -0.195) | <0.001  | -0.110 (-0.127, -0.092) | <0.001  |
| HDL(mmol/L)             | -0.169 (-0.214, -0.121) | <0.001  | -0.119 (-0.136, -0.101) | <0.001  |
| TG(mg/dL)               | -0.200 (-0.231, -0.169) | <0.001  | -0.053 (-0.059, -0.046) | <0.001  |
| FPG(mg/dL)              | -0.661 (-0.695, -0.626) | <0.001  | -0.208 (-0.226, -0.191) | <0.001  |
| WC(cm)                  | 0.150 (0.097, 0.202)    | <0.001  | 0.091 (0.067, 0.115)    | <0.001  |
| BMI(kg/m <sup>2</sup> ) | 0.113 (0.061, 0.167)    | <0.001  | 0.051 (0.027, 0.076)    | <0.001  |
| FLI                     | 0.112 (0.060, 0.165)    | <0.001  | 0.033 (0.015, 0.051)    | <0.001  |
| HSI                     | 0.059 (-0.005, 0.123)   | 0.068   | 0.048 (0.024, 0.072)    | <0.001  |
| TyG-WC                  | 0.264 (0.212, 0.316)    | <0.001  | 0.148 (0.129, 0.160)    | <0.001  |
| TyG-BMI                 | 0.187 (0.122, 0.258)    | <0.001  | 0.125 (0.107, 0.143)    | <0.001  |
| TyG-WHR                 | 0.125 (0.087, 0.167)    | <0.001  | 0.071 (0.059, 0.083)    | <0.001  |

TyG, triglyceride-glucose; TC, total cholesterol; GGT, Gamma-glutamyltransferase; HDL, high-density lipoprotein; TG, serum triglyceride; FPG, fasting plasma glucose; WC, waist circumference; BMI, body mass index; FLI, fatty liver index; HIS, hepatic steatosis index; TyG-WC, triglyceride-glucose-waist circumference; TyG-BMI, triglyceride-glucose-body mass index; TyG-WHR, triglyceride-glucose- waist-to-hip ratio.

STROBE Statement—Checklist of items that should be included in reports of *cross-sectional studies*

|                              | Item No | Recommendation                                                                                                                                                                                               | Page No |
|------------------------------|---------|--------------------------------------------------------------------------------------------------------------------------------------------------------------------------------------------------------------|---------|
| <b>Title and abstract</b>    | 1       | (a) Indicate the study's design with a commonly used term in the title or the abstract                                                                                                                       | 1       |
|                              |         | (b) Provide in the abstract an informative and balanced summary of what was done and what was found                                                                                                          | 1       |
| <b>Introduction</b>          |         |                                                                                                                                                                                                              |         |
| Background/rationale         | 2       | Explain the scientific background and rationale for the investigation being reported                                                                                                                         | 3       |
| Objectives                   | 3       | State specific objectives, including any prespecified hypotheses                                                                                                                                             | 5       |
| <b>Methods</b>               |         |                                                                                                                                                                                                              |         |
| Study design                 | 4       | Present key elements of study design early in the paper                                                                                                                                                      | 5       |
| Setting                      | 5       | Describe the setting, locations, and relevant dates, including periods of recruitment, exposure, follow-up, and data collection                                                                              | 5       |
| Participants                 | 6       | (a) Give the eligibility criteria, and the sources and methods of selection of participants                                                                                                                  | 5       |
| Variables                    | 7       | Clearly define all outcomes, exposures, predictors, potential confounders, and effect modifiers. Give diagnostic criteria, if applicable                                                                     | 6       |
| Data sources/<br>measurement | 8*      | For each variable of interest, give sources of data and details of methods of assessment (measurement). Describe comparability of assessment methods if there is more than one group                         | 6       |
| Bias                         | 9       | Describe any efforts to address potential sources of bias                                                                                                                                                    | 11      |
| Study size                   | 10      | Explain how the study size was arrived at                                                                                                                                                                    | 5       |
| Quantitative variables       | 11      | Explain how quantitative variables were handled in the analyses. If applicable, describe which groupings were chosen and why                                                                                 | 6       |
| Statistical methods          | 12      | (a) Describe all statistical methods, including those used to control for confounding                                                                                                                        | 77      |
|                              |         | (b) Describe any methods used to examine subgroups and interactions                                                                                                                                          | 7       |
|                              |         | (c) Explain how missing data were addressed                                                                                                                                                                  | 7       |
|                              |         | (d) If applicable, describe analytical methods taking account of sampling strategy                                                                                                                           | 7       |
|                              |         | (e) Describe any sensitivity analyses                                                                                                                                                                        | 7       |
| <b>Results</b>               |         |                                                                                                                                                                                                              |         |
| Participants                 | 13*     | (a) Report numbers of individuals at each stage of study—eg numbers potentially eligible, examined for eligibility, confirmed eligible, included in the study, completing follow-up, and analysed            | 8       |
|                              |         | (b) Give reasons for non-participation at each stage                                                                                                                                                         | 8       |
|                              |         | (c) Consider use of a flow diagram                                                                                                                                                                           | 8       |
| Descriptive data             | 14*     | (a) Give characteristics of study participants (eg demographic, clinical, social) and information on exposures and potential confounders                                                                     | 8       |
|                              |         | (b) Indicate number of participants with missing data for each variable of interest                                                                                                                          | 8       |
| Outcome data                 | 15*     | Report numbers of outcome events or summary measures                                                                                                                                                         | 8       |
| Main results                 | 16      | (a) Give unadjusted estimates and, if applicable, confounder-adjusted estimates and their precision (eg, 95% confidence interval). Make clear which confounders were adjusted for and why they were included | 8       |

|                          |    |                                                                                                                                                                            |    |
|--------------------------|----|----------------------------------------------------------------------------------------------------------------------------------------------------------------------------|----|
|                          |    | (b) Report category boundaries when continuous variables were categorized                                                                                                  | 8  |
|                          |    | (c) If relevant, consider translating estimates of relative risk into absolute risk for a meaningful time period                                                           | 8  |
| Other analyses           | 17 | Report other analyses done—eg analyses of subgroups and interactions, and sensitivity analyses                                                                             | 8  |
| <b>Discussion</b>        |    |                                                                                                                                                                            |    |
| Key results              | 18 | Summarise key results with reference to study objectives                                                                                                                   | 9  |
| Limitations              | 19 | Discuss limitations of the study, taking into account sources of potential bias or imprecision. Discuss both direction and magnitude of any potential bias                 | 11 |
| Interpretation           | 20 | Give a cautious overall interpretation of results considering objectives, limitations, multiplicity of analyses, results from similar studies, and other relevant evidence | 10 |
| Generalisability         | 21 | Discuss the generalisability (external validity) of the study results                                                                                                      | 9  |
| <b>Other information</b> |    |                                                                                                                                                                            |    |
| Funding                  | 22 | Give the source of funding and the role of the funders for the present study and, if applicable, for the original study on which the present article is based              | 12 |

\*Give information separately for exposed and unexposed groups.

**Note:** An Explanation and Elaboration article discusses each checklist item and gives methodological background and published examples of transparent reporting. The STROBE checklist is best used in conjunction with this article (freely available on the Web sites of PLoS Medicine at <http://www.plosmedicine.org/>, Annals of Internal Medicine at <http://www.annals.org/>, and Epidemiology at <http://www.epidem.com/>). Information on the STROBE Initiative is available at [www.strobe-statement.org](http://www.strobe-statement.org).
