# Supplementary material for: Diagnostic value of triglyceride–glucose index and related parameters in metabolism-associated fatty liver disease in a Chinese population: a cross-sectional study
Source: PubMed Central journal article supplement — BMJ Open. 2023 Sep 29;13(9):e075413. doi: 10.1136/bmjopen-2023-075413 (PMC10546149; doi:10.1136/bmjopen-2023-075413), 2023-09-29
Supplement: bmjopen-2023-075413supp001.pdf [file bmjopen-2023-075413supp001.pdf]

**Supplement Table 1. Area under curve (AUC) analysis.**

| Variables               | AUC (95%CI)          | AIC    | Sensitivity% | Specificity% | optimal cut-off | P -value |
|-------------------------|----------------------|--------|--------------|--------------|-----------------|----------|
| TC(mmol/L)              | 0.588 (0.564, 0.613) | 3206.9 | 58.3%        | 58.6%        | 5.045           | <0.001   |
| GGT(U/L)                | 0.761 (0.742, 0.781) | 2982.7 | 74.8%        | 65.6%        | 24.500          | <0.001   |
| HDL(mmol/L)             | 0.711 (0.689, 0.732) | 3214.3 | 69.1%        | 63.4%        | 1.285           | 1.000    |
| TG(mg/dL)               | 0.784 (0.764, 0.803) | 3057.6 | 68.2%        | 78.0%        | 137.618         | <0.001   |
| FPG(mg/dL)              | 0.653 (0.629, 0.677) | 3085.7 | 55.1%        | 69.7%        | 95.67           | <0.001   |
| WC(cm)                  | 0.846 (0.830, 0.861) | 2378.3 | 80.2%        | 74.9%        | 84.500          | <0.001   |
| BMI(kg/m <sup>2</sup> ) | 0.822 (0.804, 0.839) | 2486.4 | 78.9%        | 72.5%        | 23.525          | <0.001   |
| FLI                     | 0.872 (0.859, 0.886) | 2809.1 | 87.5%        | 72.1%        | 0.419           | <0.001   |
| HSI                     | 0.821 (0.803, 0.838) | 2554.0 | 77.1%        | 73.3%        | 32.715          | <0.001   |
| TyG                     | 0.793 (0.774, 0.812) | 2676.8 | 72.2%        | 75.0%        | 8.738           | <0.001   |
| TyG-WC                  | 0.873 (0.860, 0.887) | 2199.6 | 88.7%        | 71.4%        | 716.743         | <0.001   |
| TyG-BMI                 | 0.862 (0.847, 0.876) | 2239.1 | 85.3%        | 73.3%        | 203.154         | <0.001   |
| TyG-WHR                 | 0.836 (0.820, 0.852) | 2448.0 | 84.6%        | 67.7%        | 7.444           | <0.001   |

AIC, Akaike information criterion; TC, total cholesterol; GGT, Gamma-glutamyltransferase; HDL, high-density lipoprotein; TG, serum triglyceride; FPG, fasting plasma glucose; WC, waist circumference; BMI, body mass index; FLI, fatty liver index; HSI, hepatic steatosis index; TyG, triglyceride-glucose; TyG-WC, triglyceride-glucose-waist circumference; TyG-BMI, triglyceride-glucose-body mass index; TyG-WHR, triglyceride-glucose-waist-to-hip ratio.

**Supplement Table 2** NRI and IDI analyses

| Variables               | NRI (95%CI)             | P-value | IDI (95%CI)             | P-value |
|-------------------------|-------------------------|---------|-------------------------|---------|
| TyG                     | Reference               | <0.001  | Reference               | <0.001  |
| TC(mmol/L)              | -0.437 (-0.479, -0.395) | <0.001  | -0.199 (-0.216, -0.182) | <0.001  |
| GGT(mmol/L)             | -0.249 (-0.298, -0.195) | <0.001  | -0.110 (-0.127, -0.092) | <0.001  |
| HDL(mmol/L)             | -0.169 (-0.214, -0.121) | <0.001  | -0.119 (-0.136, -0.101) | <0.001  |
| TG(mg/dL)               | -0.200 (-0.231, -0.169) | <0.001  | -0.053 (-0.059, -0.046) | <0.001  |
| FPG(mg/dL)              | -0.661 (-0.695, -0.626) | <0.001  | -0.208 (-0.226, -0.191) | <0.001  |
| WC(cm)                  | 0.150 (0.097, 0.202)    | <0.001  | 0.091 (0.067, 0.115)    | <0.001  |
| BMI(kg/m <sup>2</sup> ) | 0.113 (0.061, 0.167)    | <0.001  | 0.051 (0.027, 0.076)    | <0.001  |
| FLI                     | 0.112 (0.060, 0.165)    | <0.001  | 0.033 (0.015, 0.051)    | <0.001  |
| HSI                     | 0.059 (-0.005, 0.123)   | 0.068   | 0.048 (0.024, 0.072)    | <0.001  |
| TyG-WC                  | 0.264 (0.212, 0.316)    | <0.001  | 0.148 (0.129, 0.160)    | <0.001  |
| TyG-BMI                 | 0.187 (0.122, 0.258)    | <0.001  | 0.125 (0.107, 0.143)    | <0.001  |
| TyG-WHR                 | 0.125 (0.087, 0.167)    | <0.001  | 0.071 (0.059, 0.083)    | <0.001  |

TyG, triglyceride-glucose; TC, total cholesterol; GGT, Gamma-glutamyltransferase; HDL, high-density lipoprotein; TG, serum triglyceride; FPG, fasting plasma glucose; WC, waist circumference; BMI, body mass index; FLI, fatty liver index; HIS, hepatic steatosis index; TyG-WC, triglyceride-glucose-waist circumference; TyG-BMI, triglyceride-glucose-body mass index; TyG-WHR, triglyceride-glucose- waist-to-hip ratio.
